# Supplementary material
Source: PubMed Central journal article supplement (PMC3285137)

## Supporting information for

Contribution of Phosphates and Adenine to the Potency of Adenophostins at the IP<sub>3</sub> Receptor: Synthesis of all Possible Bisphosphates of Adenophostin A

*Kana M. Sureshan, Andrew M. Riley, Mark P. Thomas, Stephen C. Tovey, Colin W. Taylor,*

*Barry V. L. Potter\**

### INDEX

|    |                                                                                                          |           |
|----|----------------------------------------------------------------------------------------------------------|-----------|
| 1  | <sup>1</sup> H NMR, COSY, <sup>13</sup> C NMR, DEPT, HMQC of <b>10</b>                                   | S2-S6     |
| 2  | <sup>1</sup> H NMR, COSY, <sup>13</sup> C NMR, DEPT, HMQC of <b>11</b>                                   | S7-S11    |
| 3  | <sup>1</sup> H NMR, COSY, <sup>13</sup> C NMR, DEPT, HMQC of <b>12</b>                                   | S12-S16   |
| 4  | <sup>1</sup> H NMR, COSY, <sup>13</sup> C NMR, DEPT, HMQC of <b>15</b>                                   | S17-S21   |
| 5  | <sup>1</sup> H NMR, COSY, <sup>13</sup> C NMR, DEPT, HMQC of <b>17</b>                                   | S22-S26   |
| 6  | <sup>1</sup> H NMR, COSY, <sup>13</sup> C NMR, DEPT, HMQC of <b>19</b>                                   | S27-S31   |
| 7  | <sup>1</sup> H NMR, COSY, <sup>13</sup> C NMR, DEPT, HMQC of <b>20</b>                                   | S32-S36   |
| 8  | <sup>1</sup> H NMR, COSY, <sup>13</sup> C NMR, DEPT, HMQC of <b>21</b>                                   | S37-S41   |
| 9  | <sup>1</sup> H NMR, COSY, <sup>13</sup> C NMR, DEPT, HMQC, <sup>31</sup> P NMR of <b>4</b>               | S42-S47   |
| 10 | <sup>1</sup> H NMR, COSY, <sup>13</sup> C NMR, DEPT, HMQC of <b>27</b>                                   | S48-S53   |
| 11 | <sup>1</sup> H NMR, COSY, <sup>13</sup> C NMR, DEPT, HMQC of <b>28</b>                                   | S54-S58   |
| 12 | <sup>1</sup> H NMR, COSY, <sup>13</sup> C NMR, DEPT, HMQC of <b>29</b>                                   | S59-S63   |
| 13 | <sup>1</sup> H NMR, COSY, <sup>13</sup> C NMR, DEPT, HMQC, HMBC of <b>30</b>                             | S64-S69   |
| 14 | <sup>1</sup> H NMR, COSY, <sup>13</sup> C NMR, DEPT, HMQC, HMBC, NOESY, <sup>31</sup> P NMR of <b>31</b> | S70-S77   |
| 15 | <sup>1</sup> H NMR, COSY, <sup>13</sup> C NMR, DEPT, HMQC, HMBC, NOESY, <sup>31</sup> P NMR of <b>5</b>  | S78-S85   |
| 16 | <sup>1</sup> H NMR, COSY, <sup>13</sup> C NMR, DEPT, HMQC, HMBC, <sup>31</sup> P NMR of <b>34</b>        | S86-S92   |
| 17 | <sup>1</sup> H NMR, COSY, <sup>13</sup> C NMR, DEPT, HMQC, HMBC, NOESY, <sup>31</sup> P NMR of <b>6</b>  | S93-S100  |
| 18 | <sup>1</sup> H NMR, <sup>13</sup> C NMR, <sup>31</sup> P NMR of <b>38</b>                                | S101-S103 |
| 19 | <sup>1</sup> H NMR, <sup>13</sup> C NMR, <sup>31</sup> P NMR of <b>39</b>                                | S104-S106 |
| 20 | <sup>1</sup> H NMR, <sup>13</sup> C NMR, <sup>31</sup> P NMR of <b>7</b>                                 | S107-S109 |
| 21 | <sup>1</sup> H NMR, <sup>13</sup> C NMR, <sup>31</sup> P NMR of <b>2</b>                                 | S110-S112 |

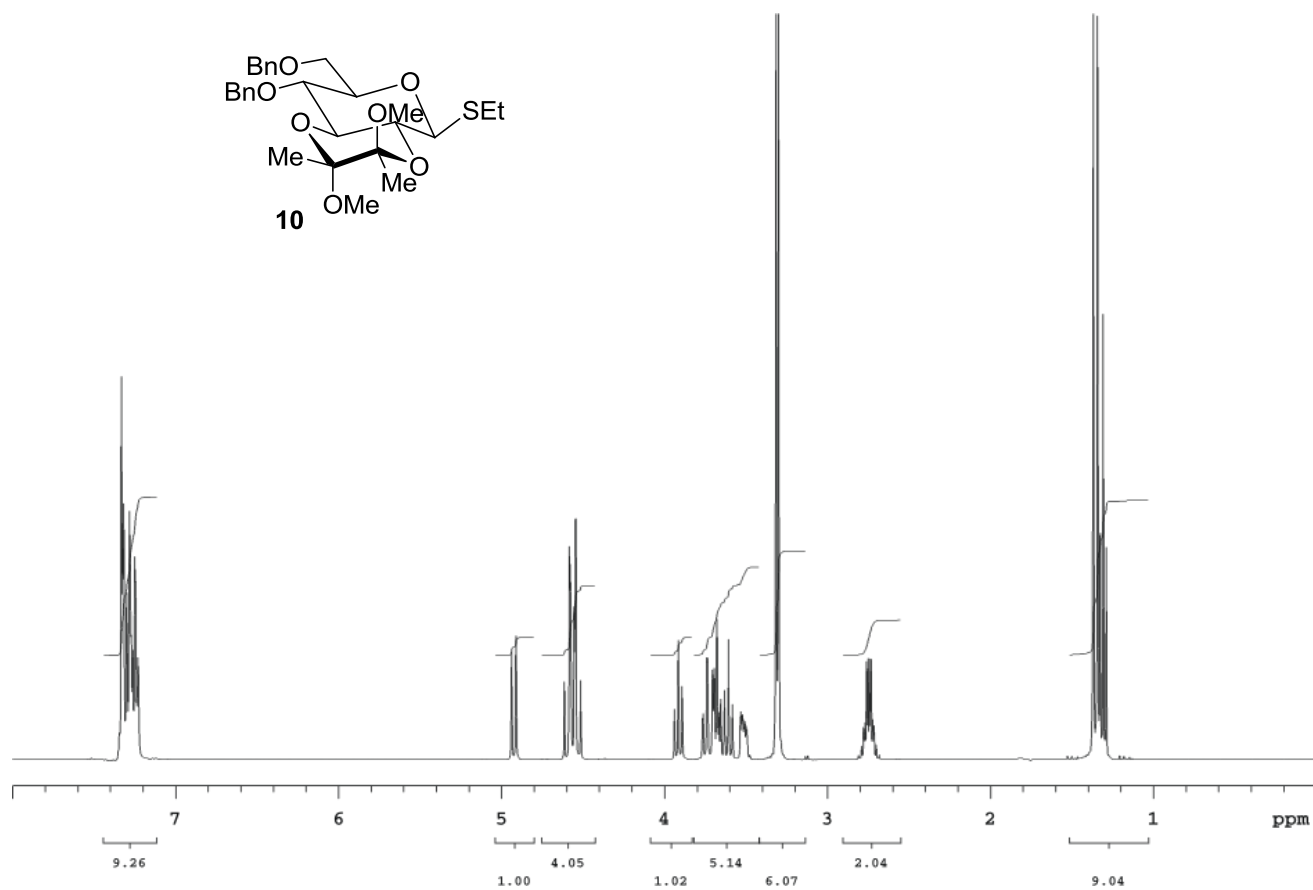

Sample: kms103\_2005-07-14

Filename: gCOSY\_01

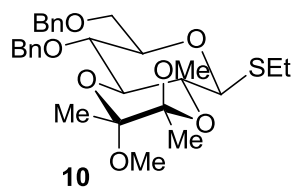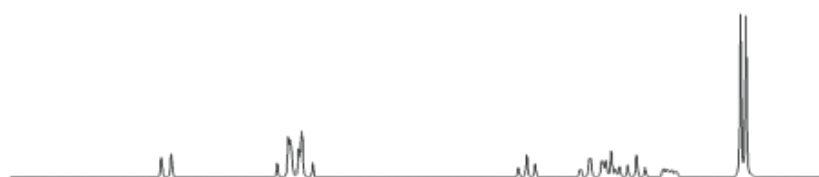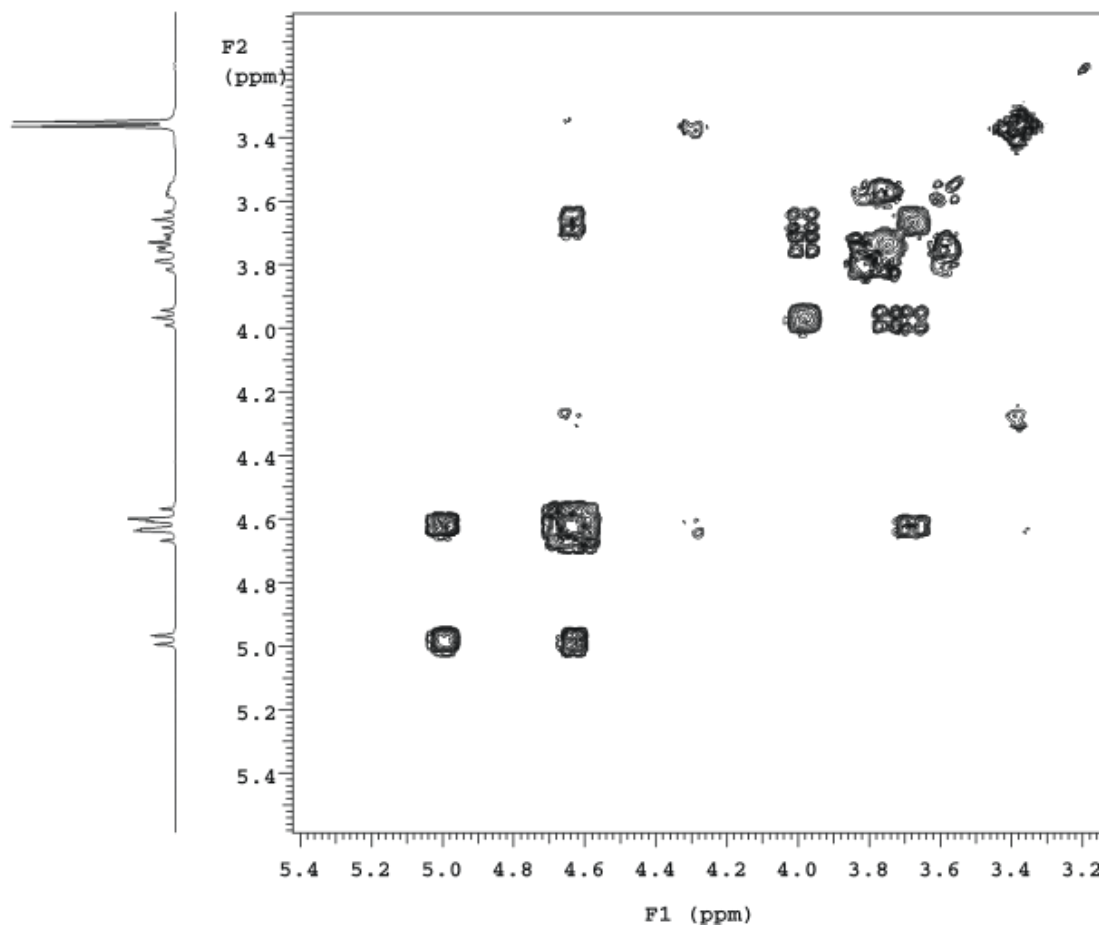

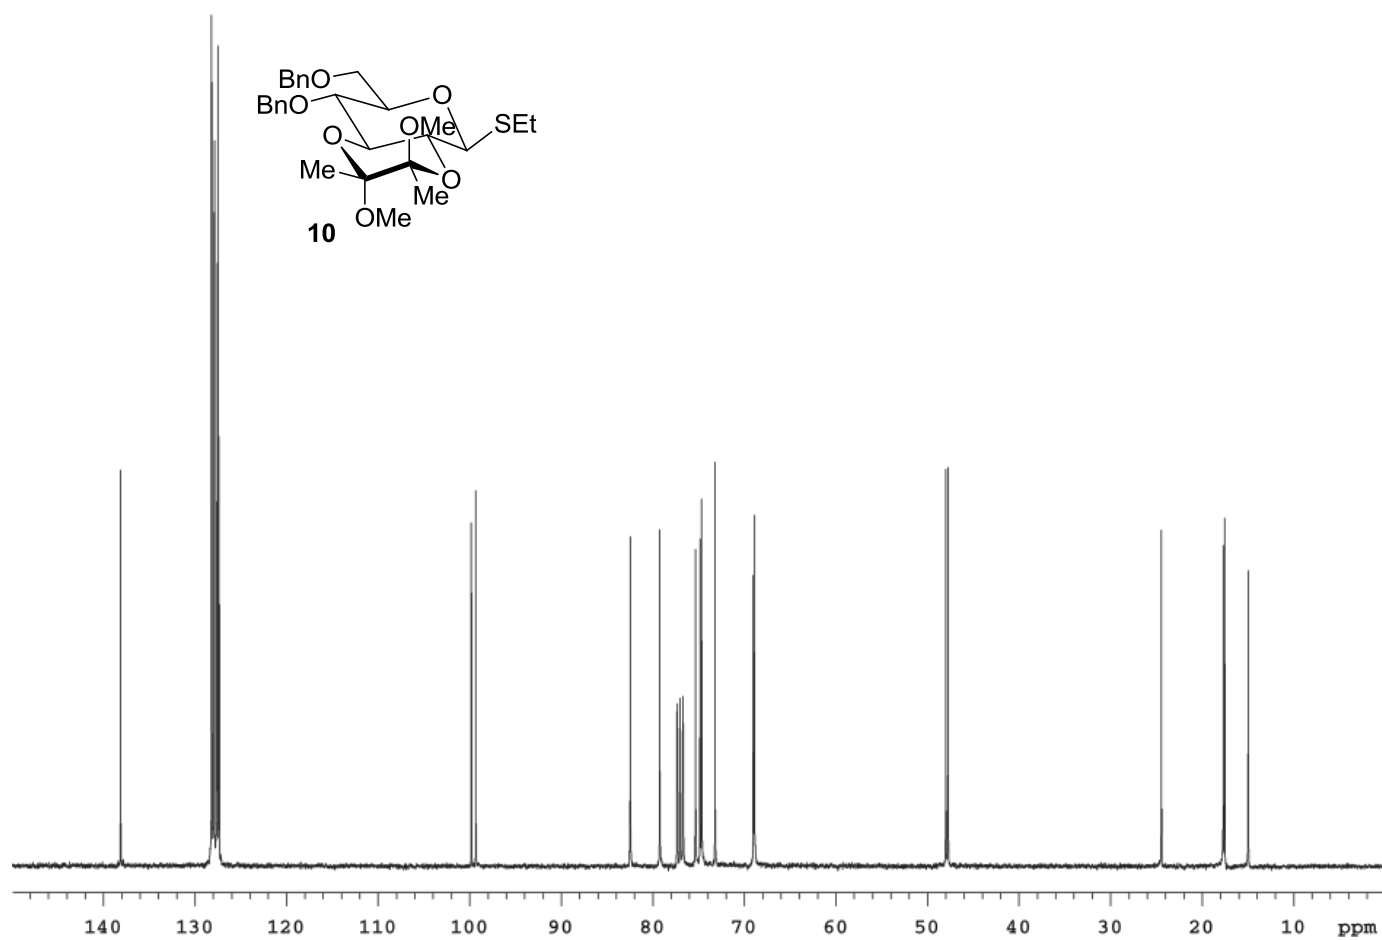

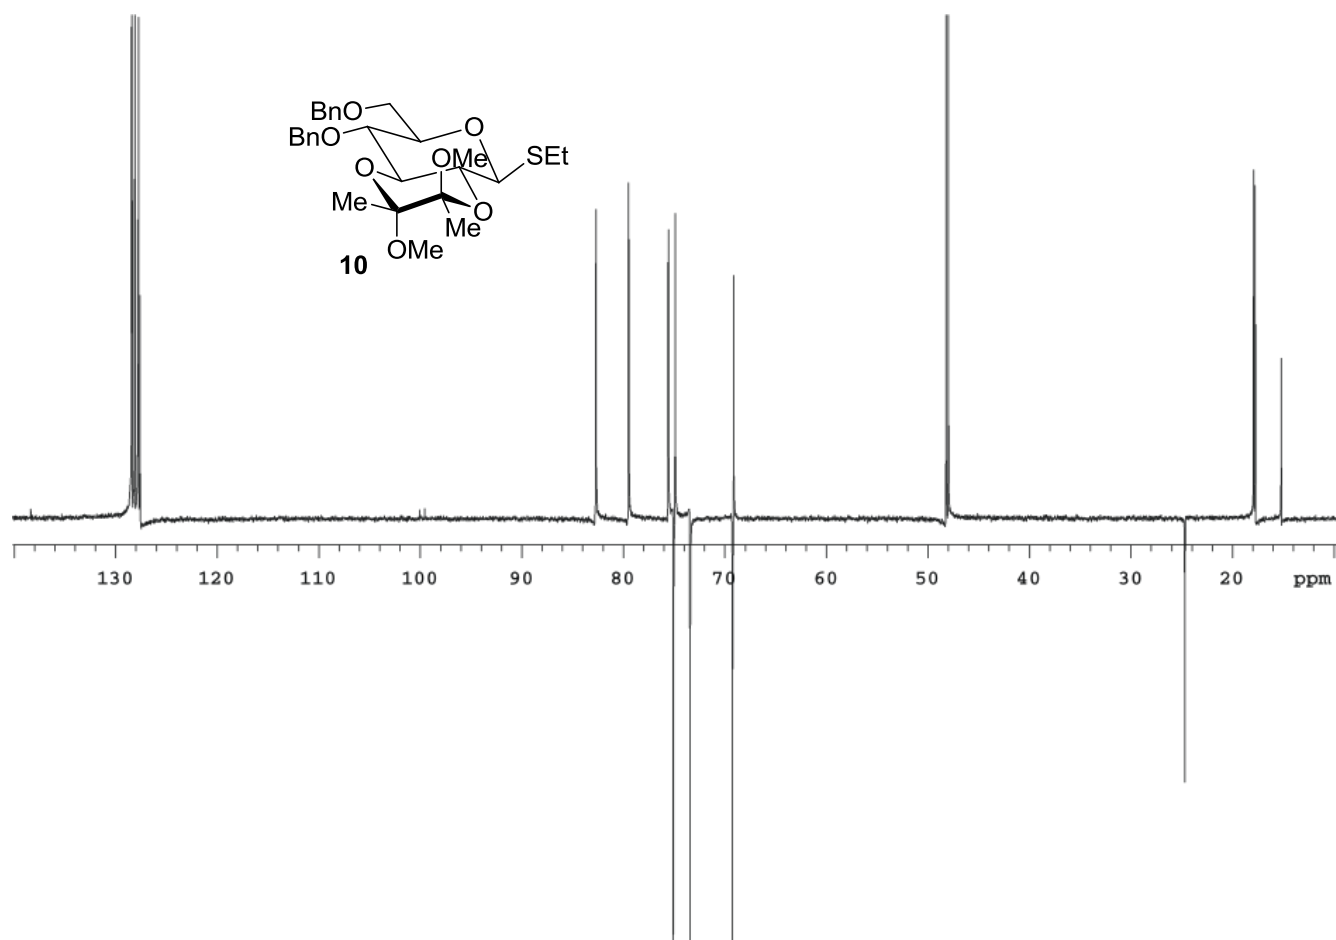

Sample: kms103\_2005-07-14

Filename: gHMQC\_01

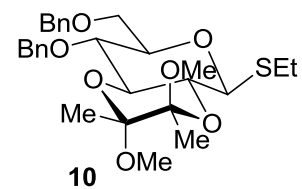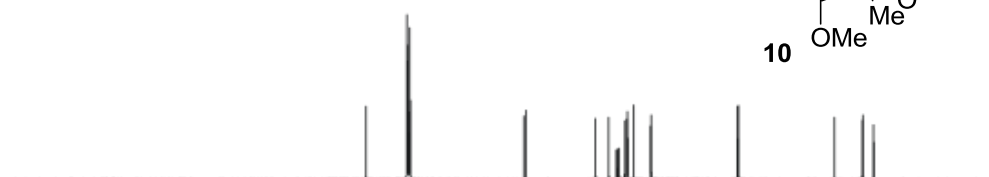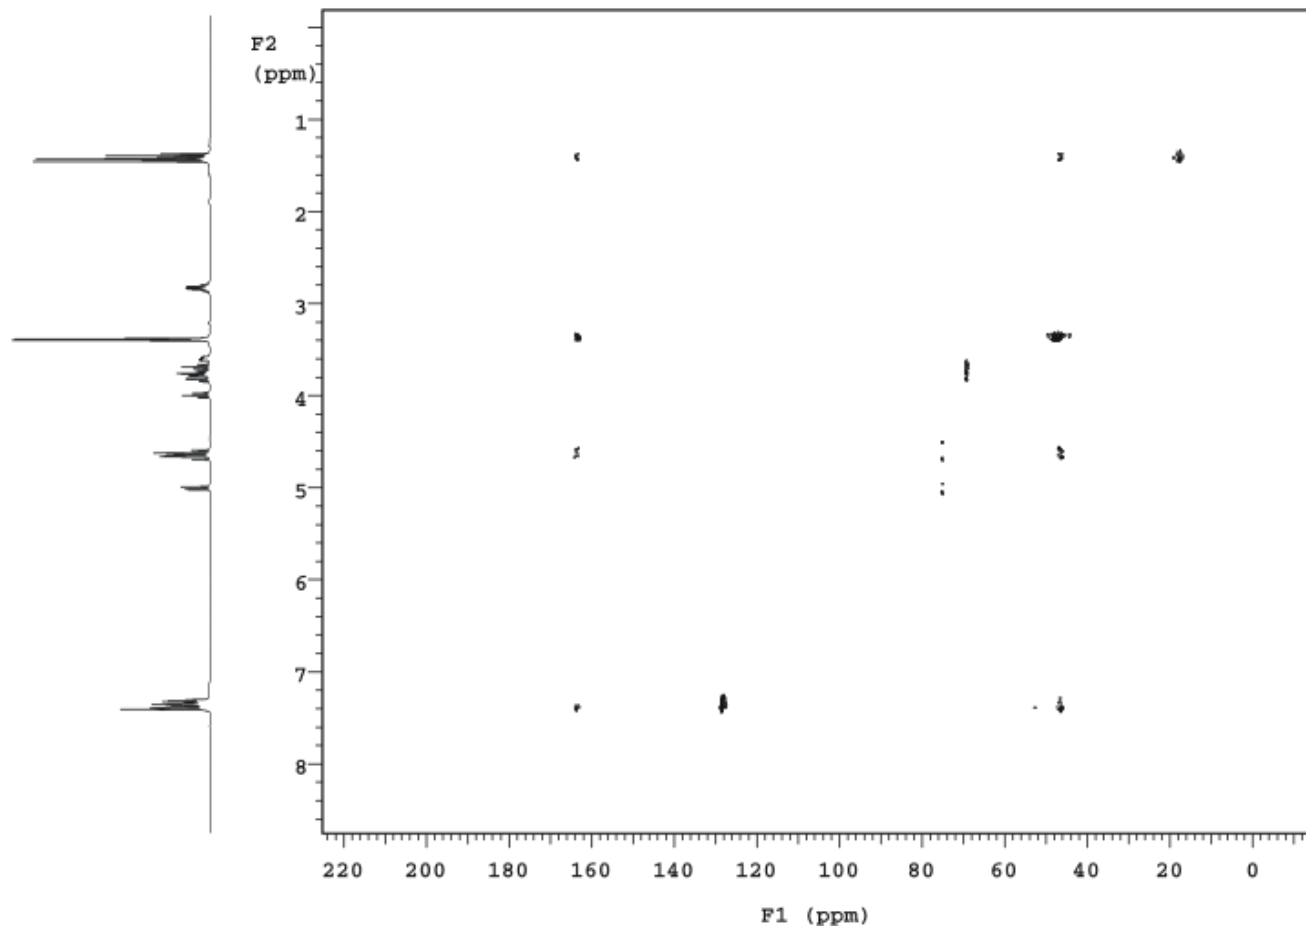

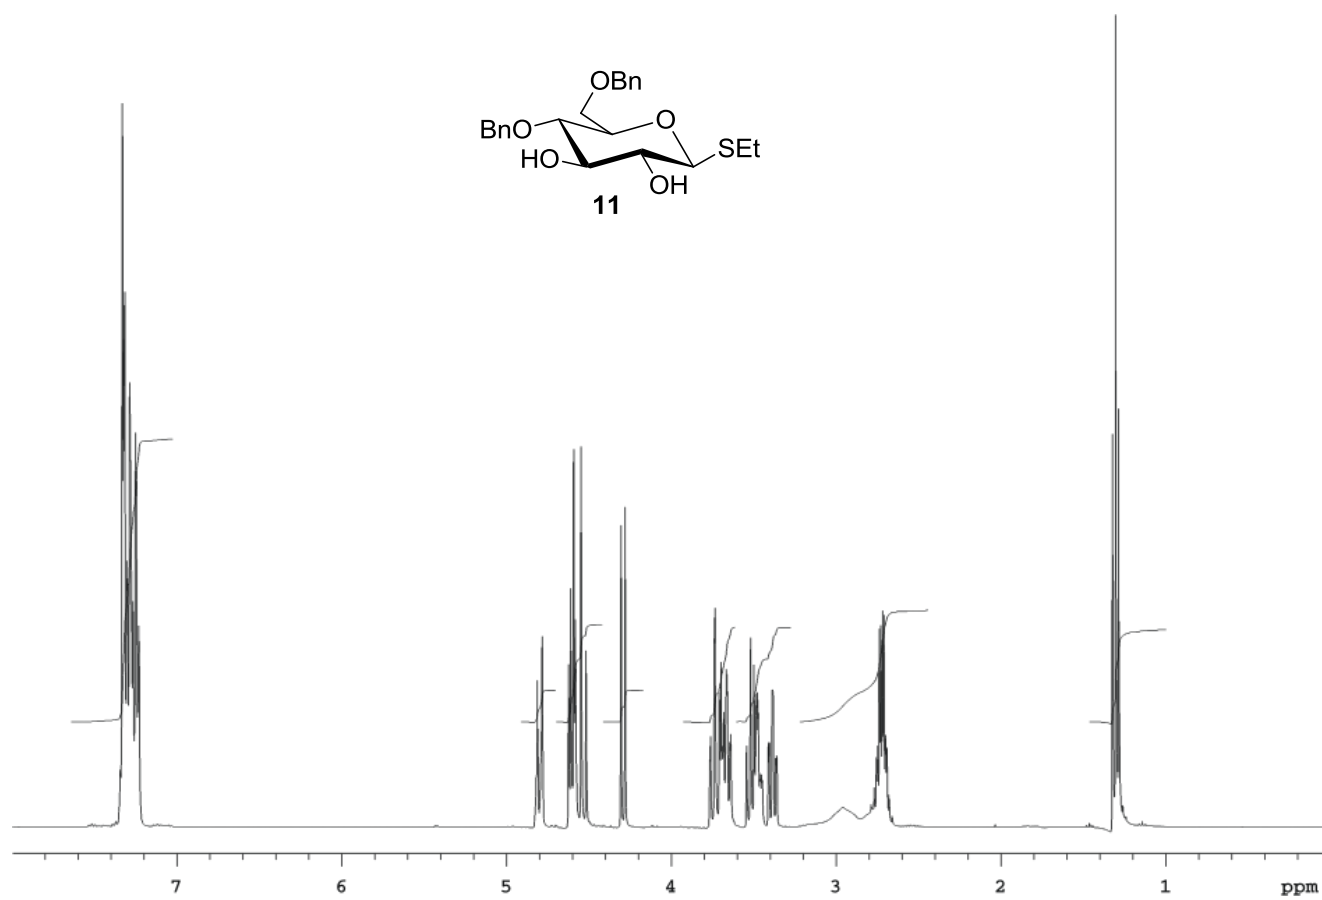

Sample: kms106\_2005-07-25

Filename: gCOSY\_01

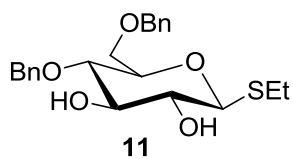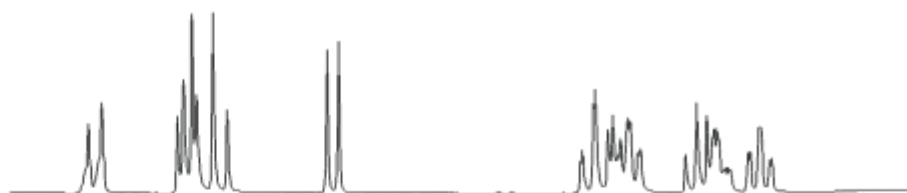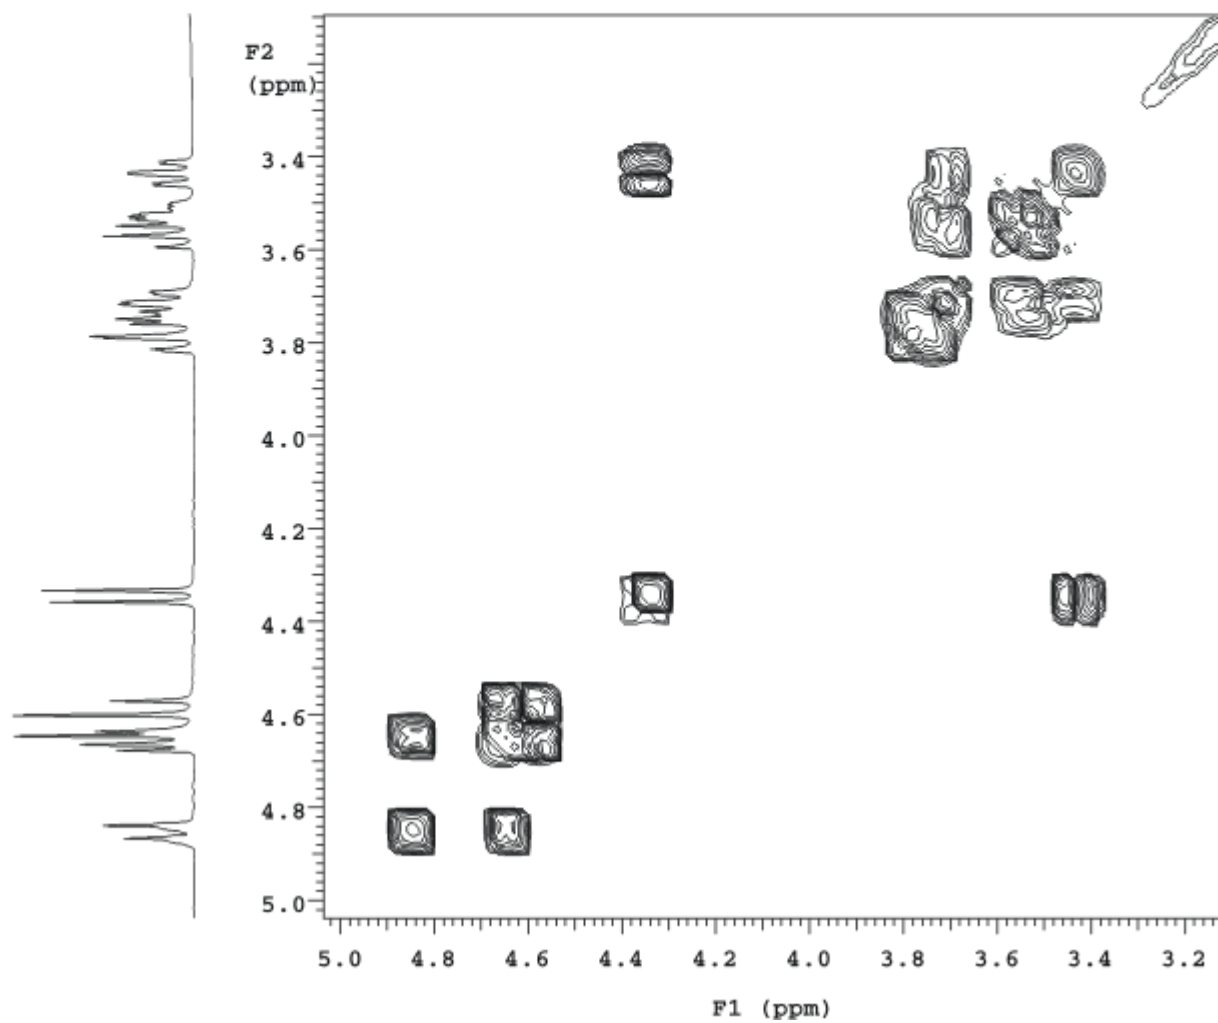



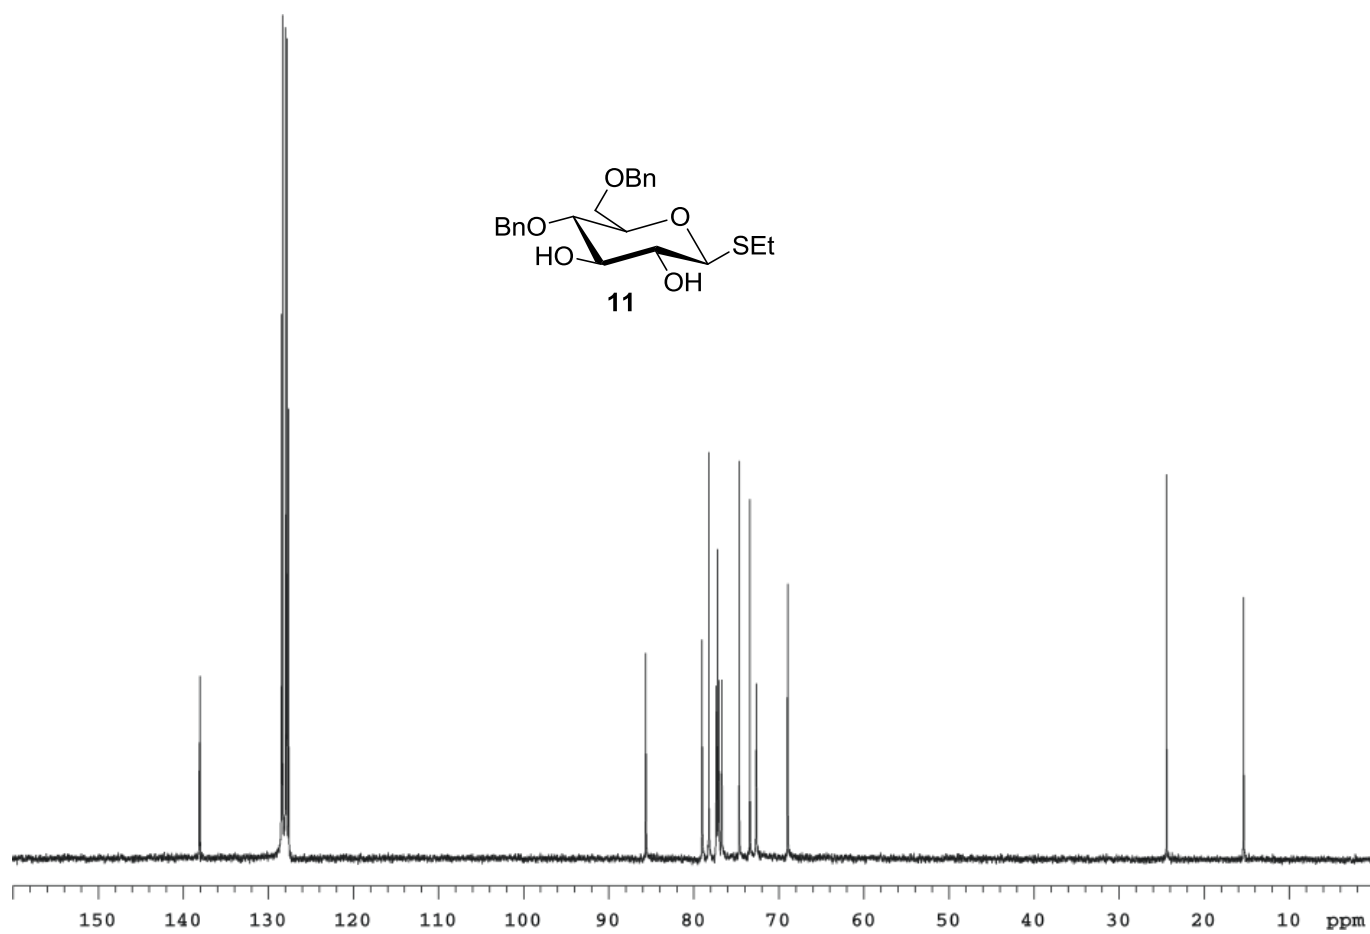

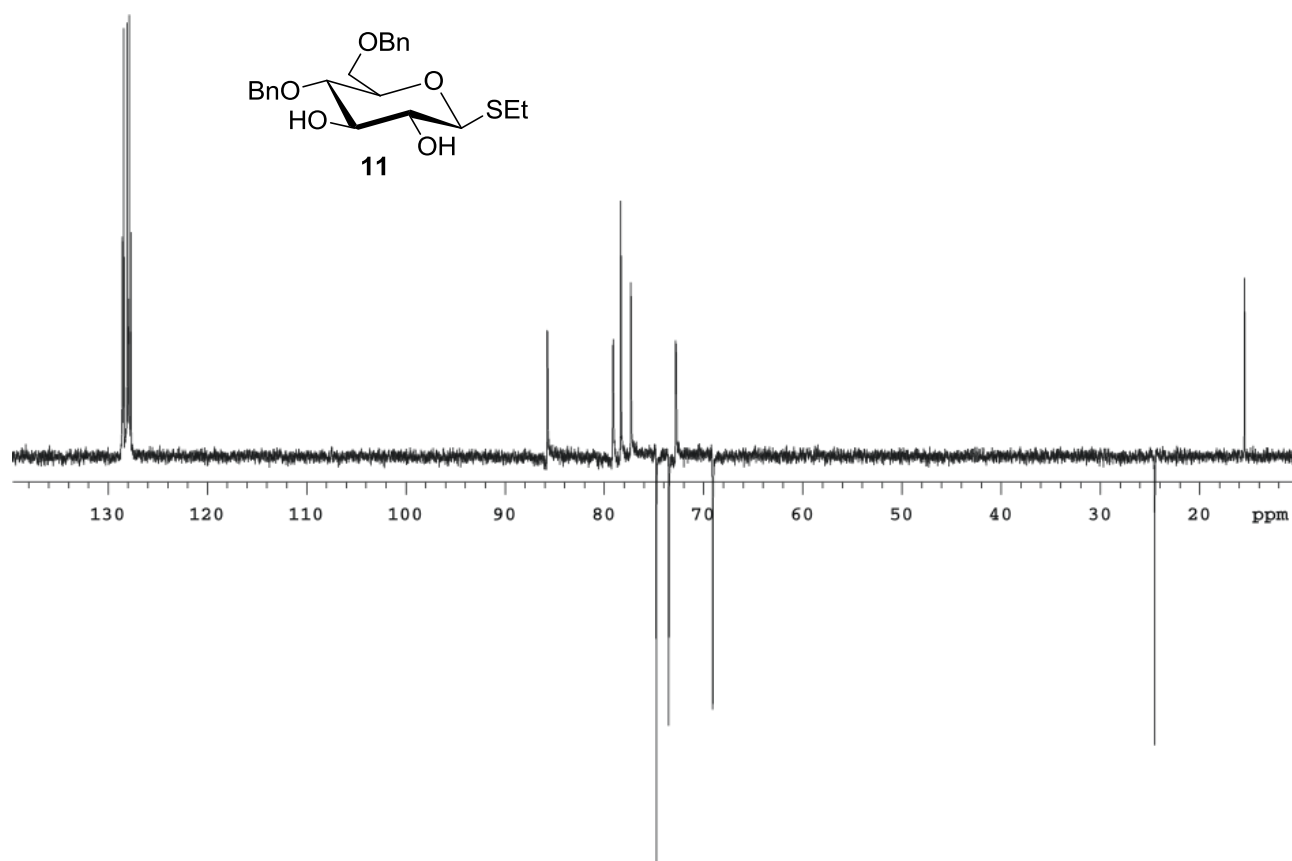

Sample: kms106\_2005-07-25

Filename: gHMQC\_01

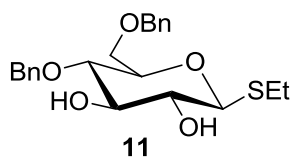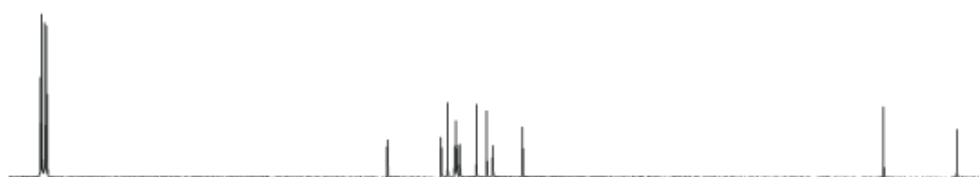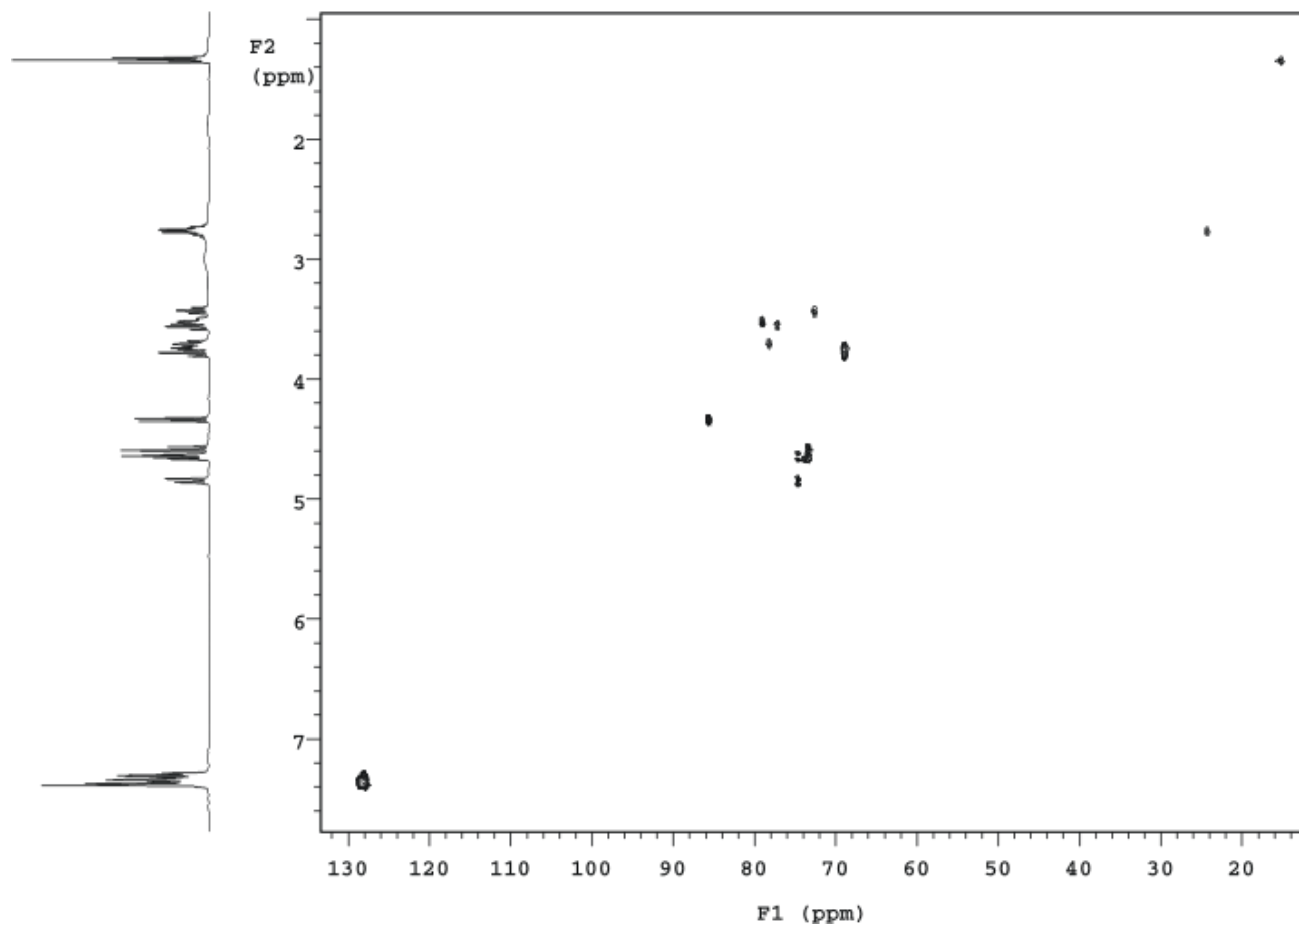

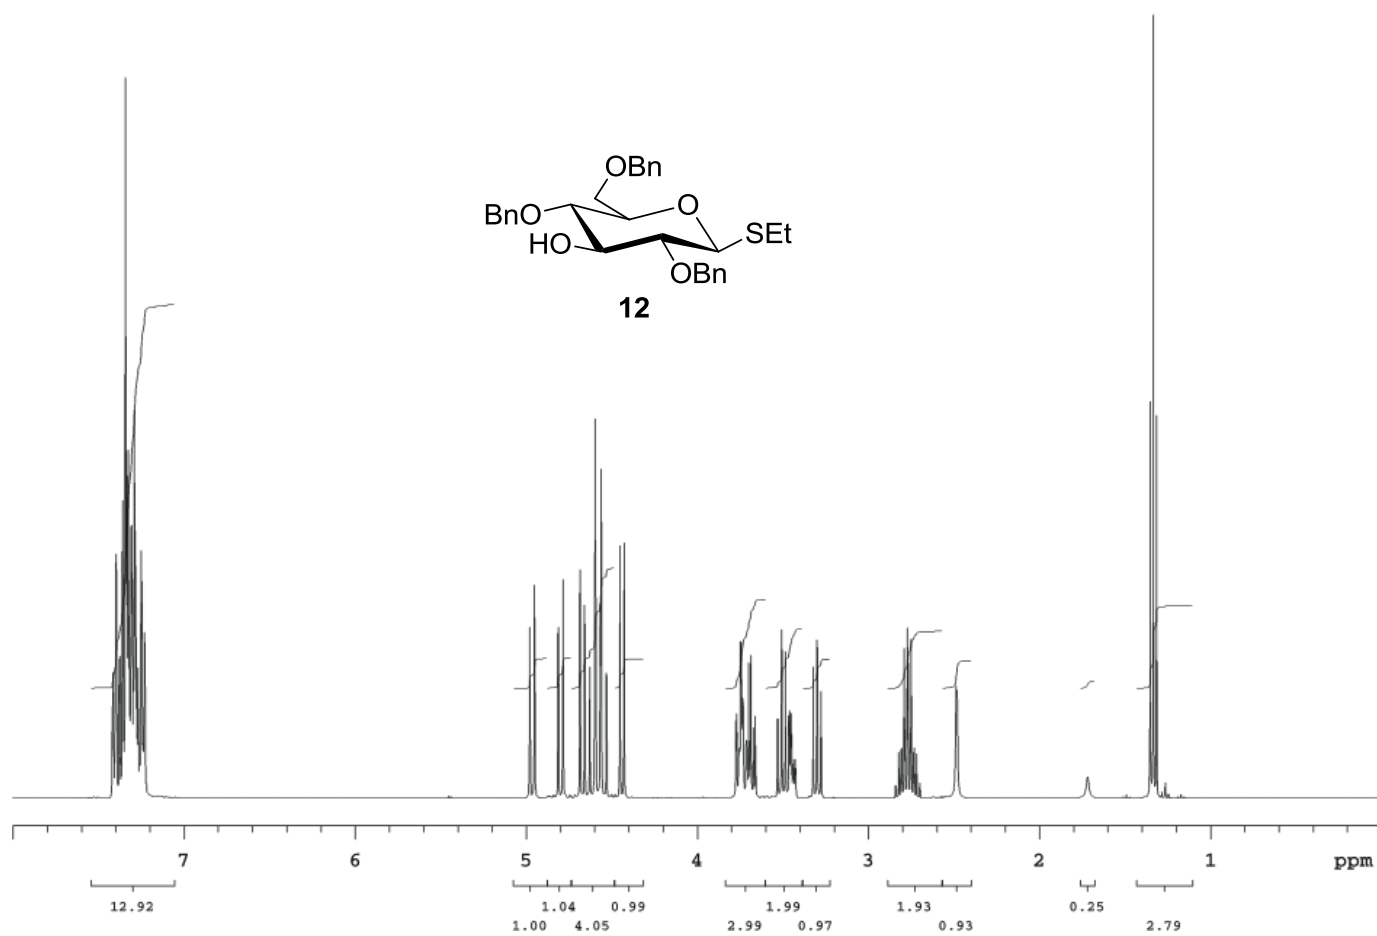

Sample: kms120a\_2005-08-15

Filename: gCOSY\_01

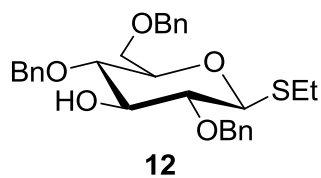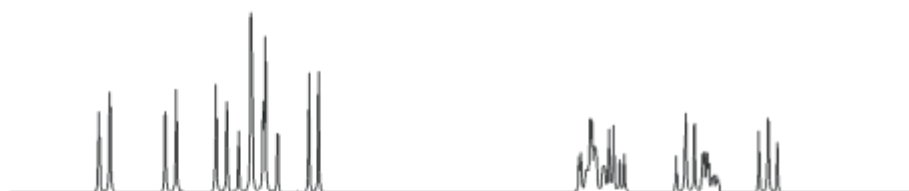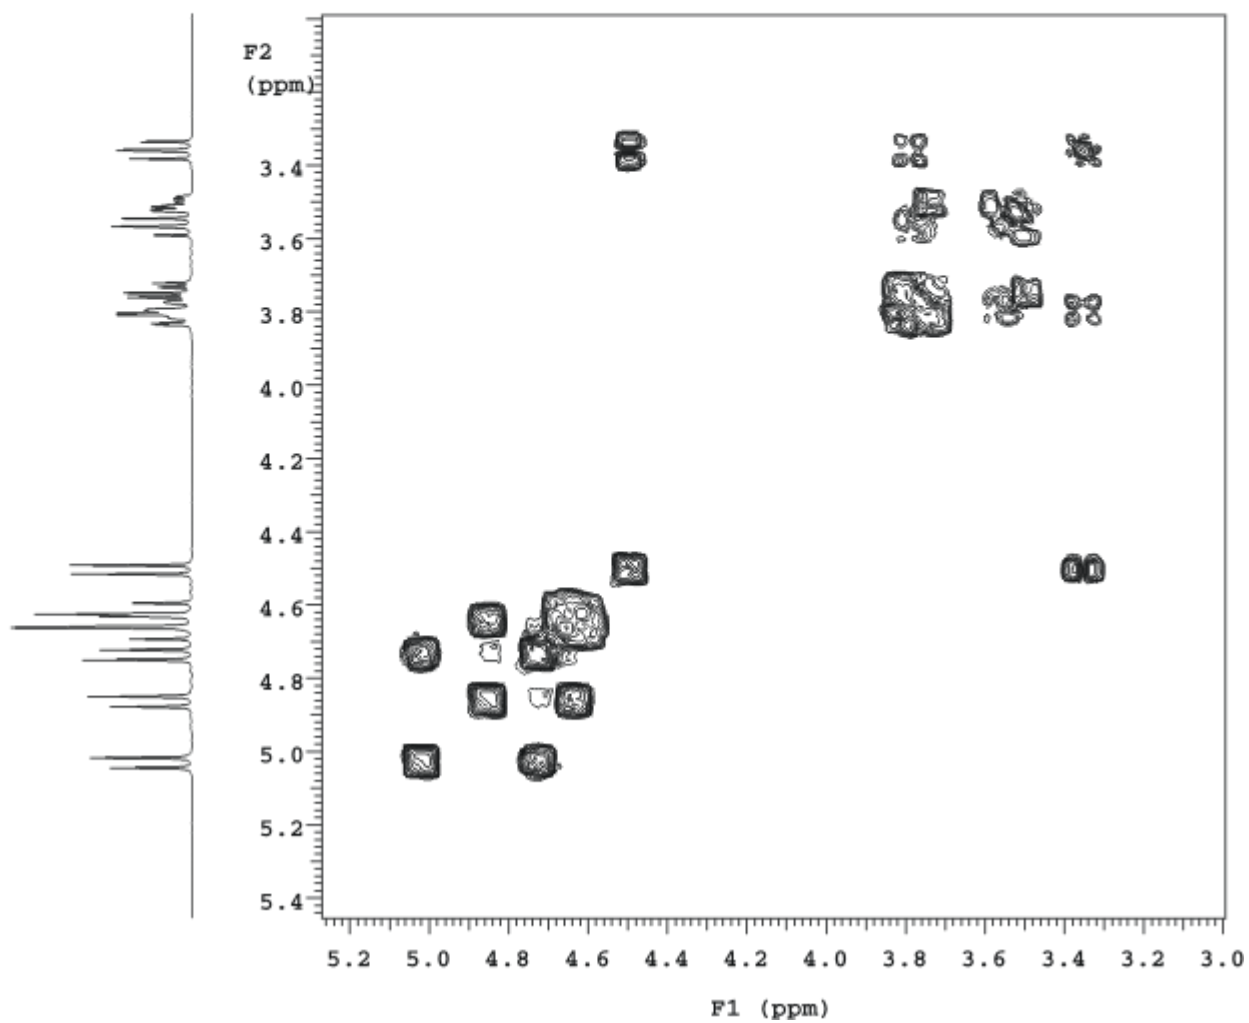

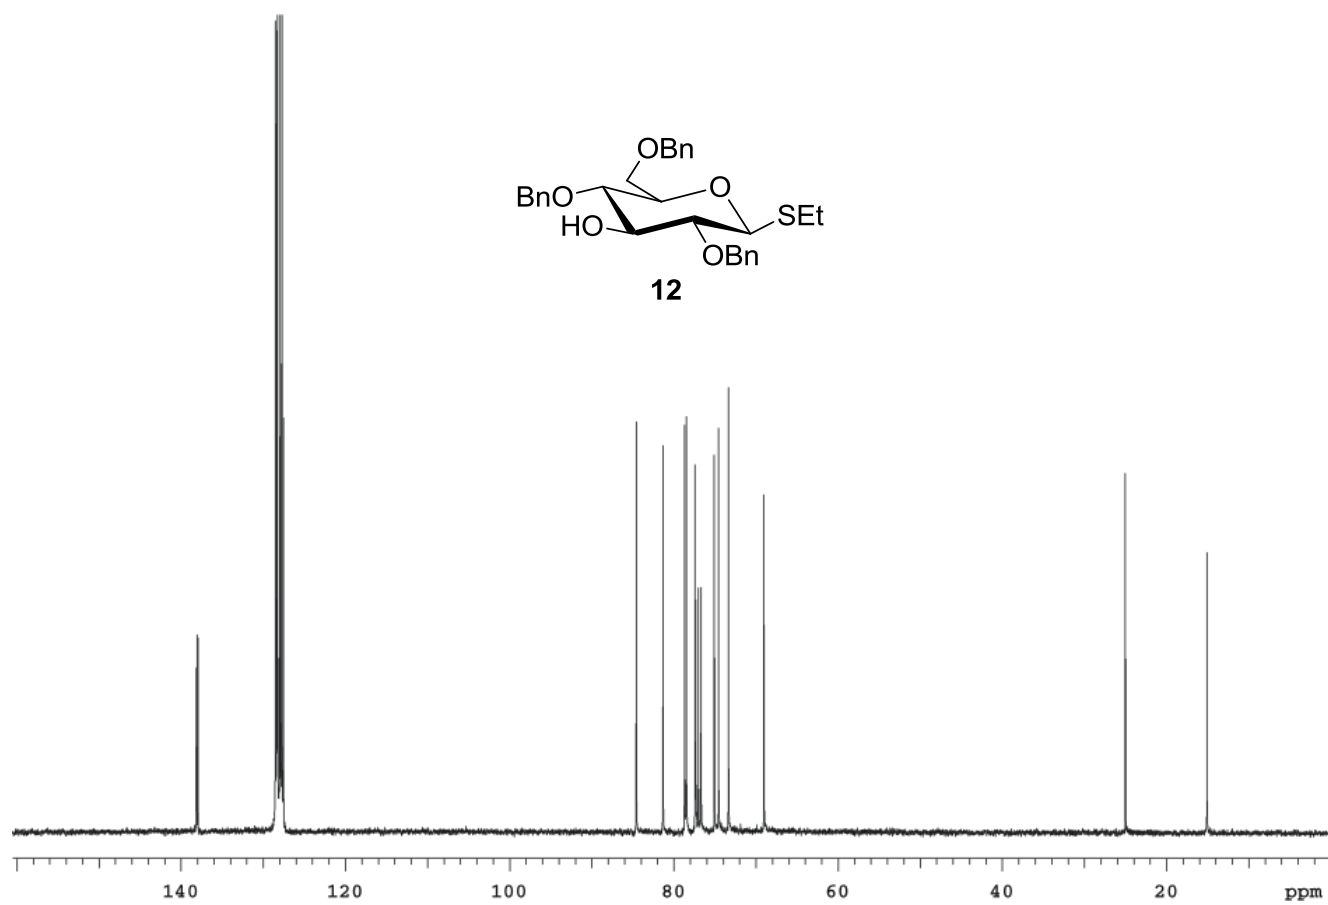

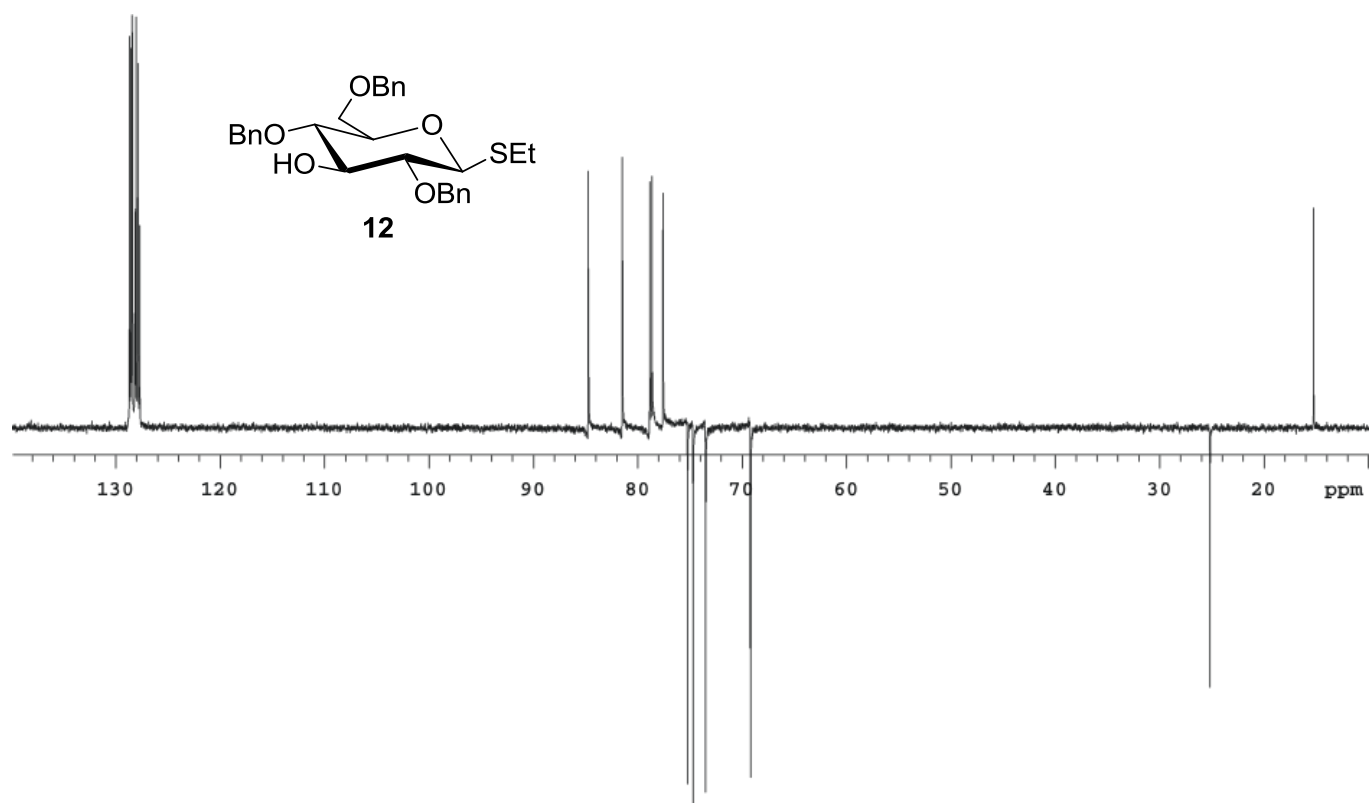

Sample: kms120a\_2005-08-15

Filename: gHMQC\_01

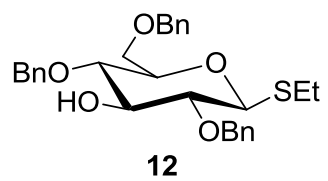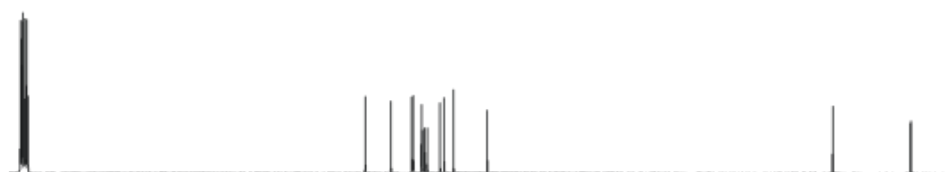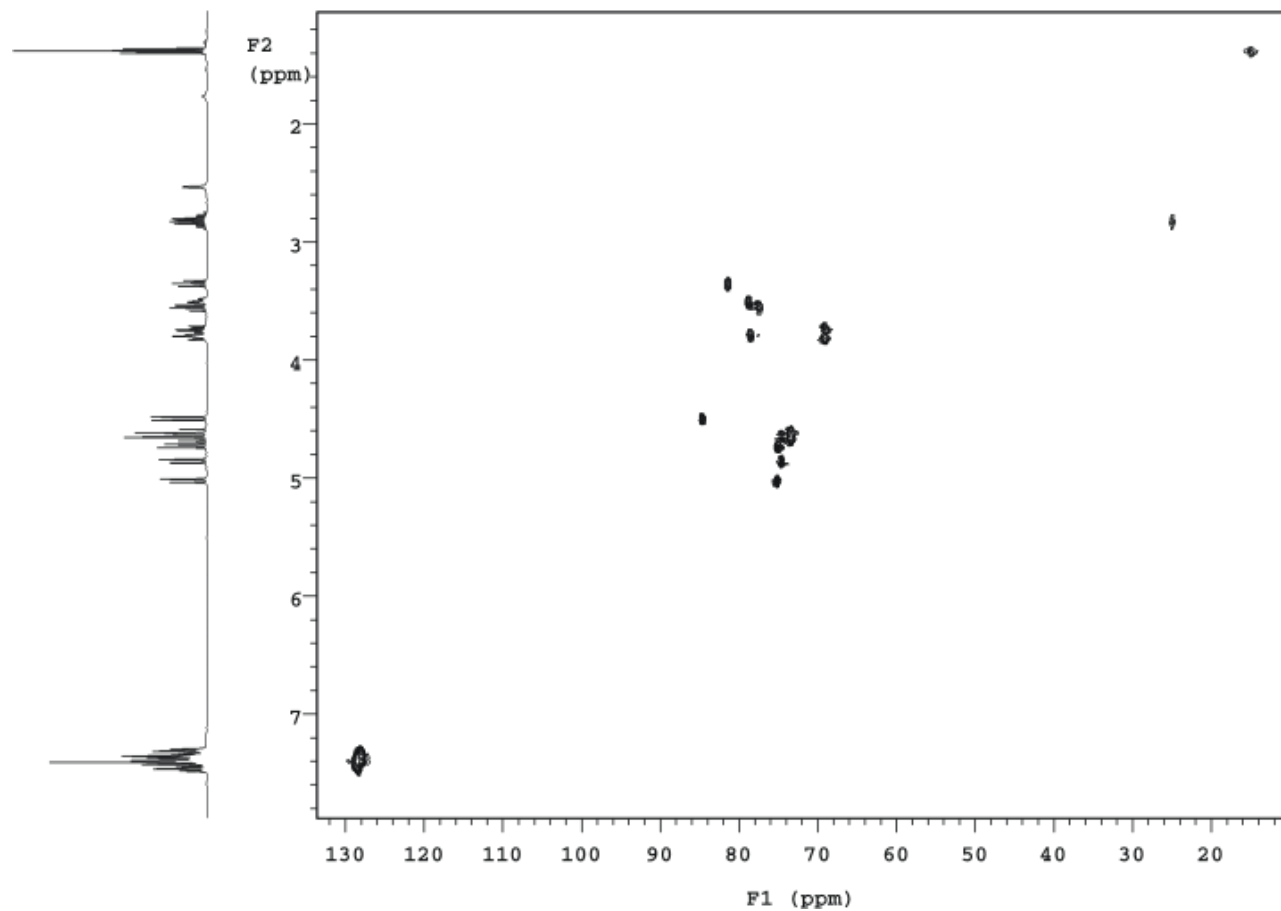



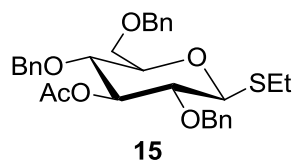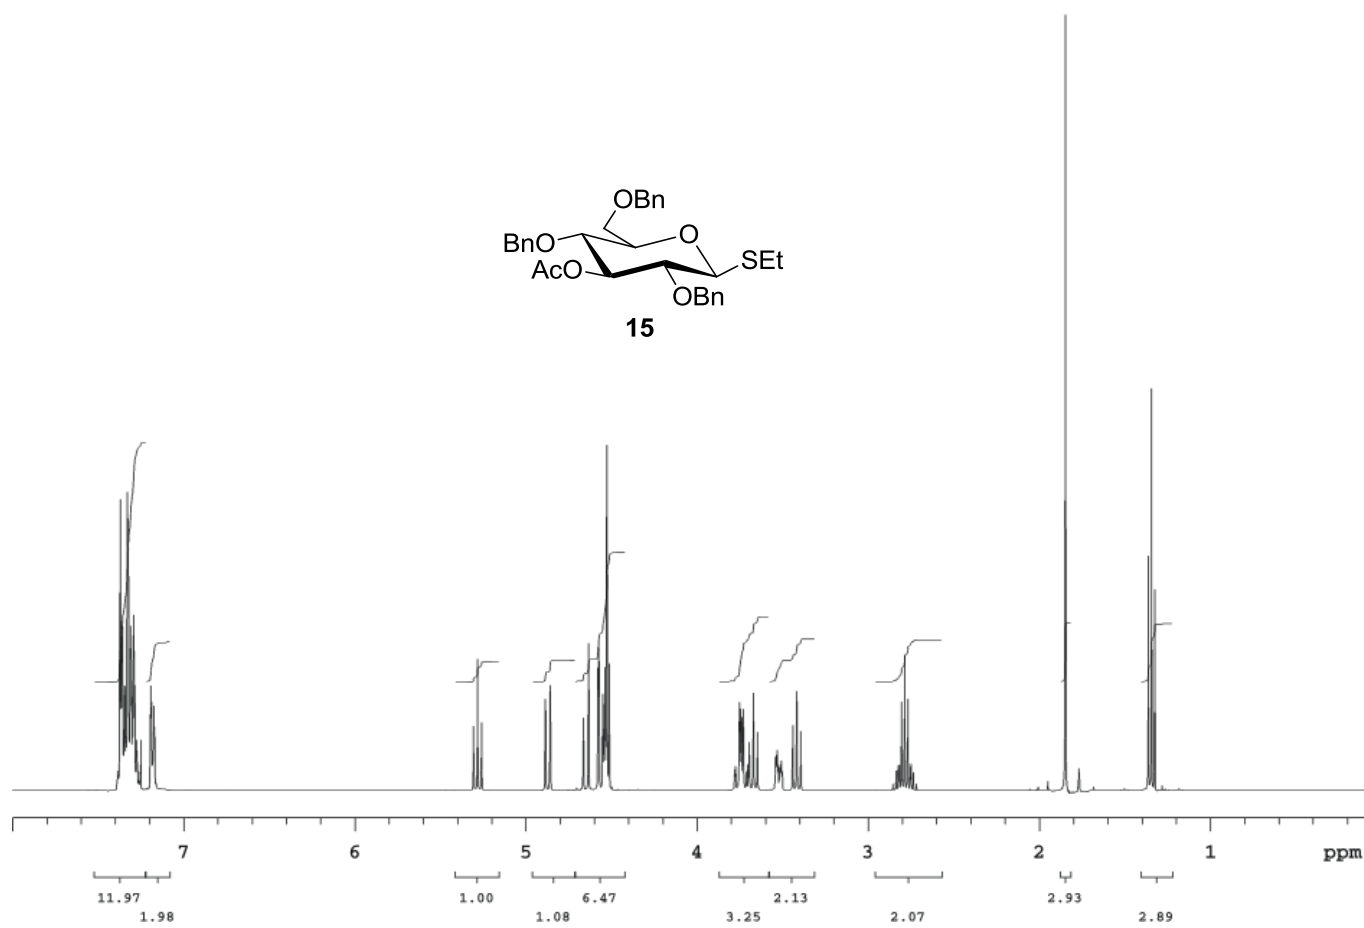

Sample: kms130\_2005-08-24

Filename: gCOSY\_01

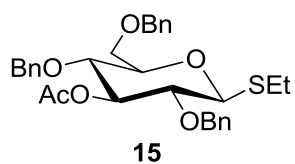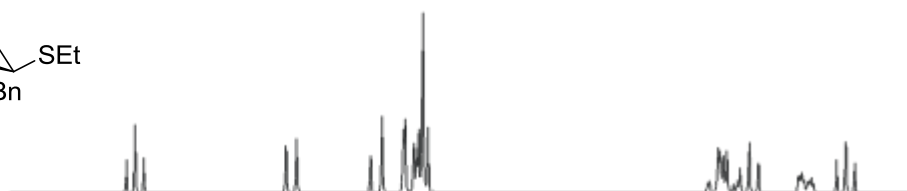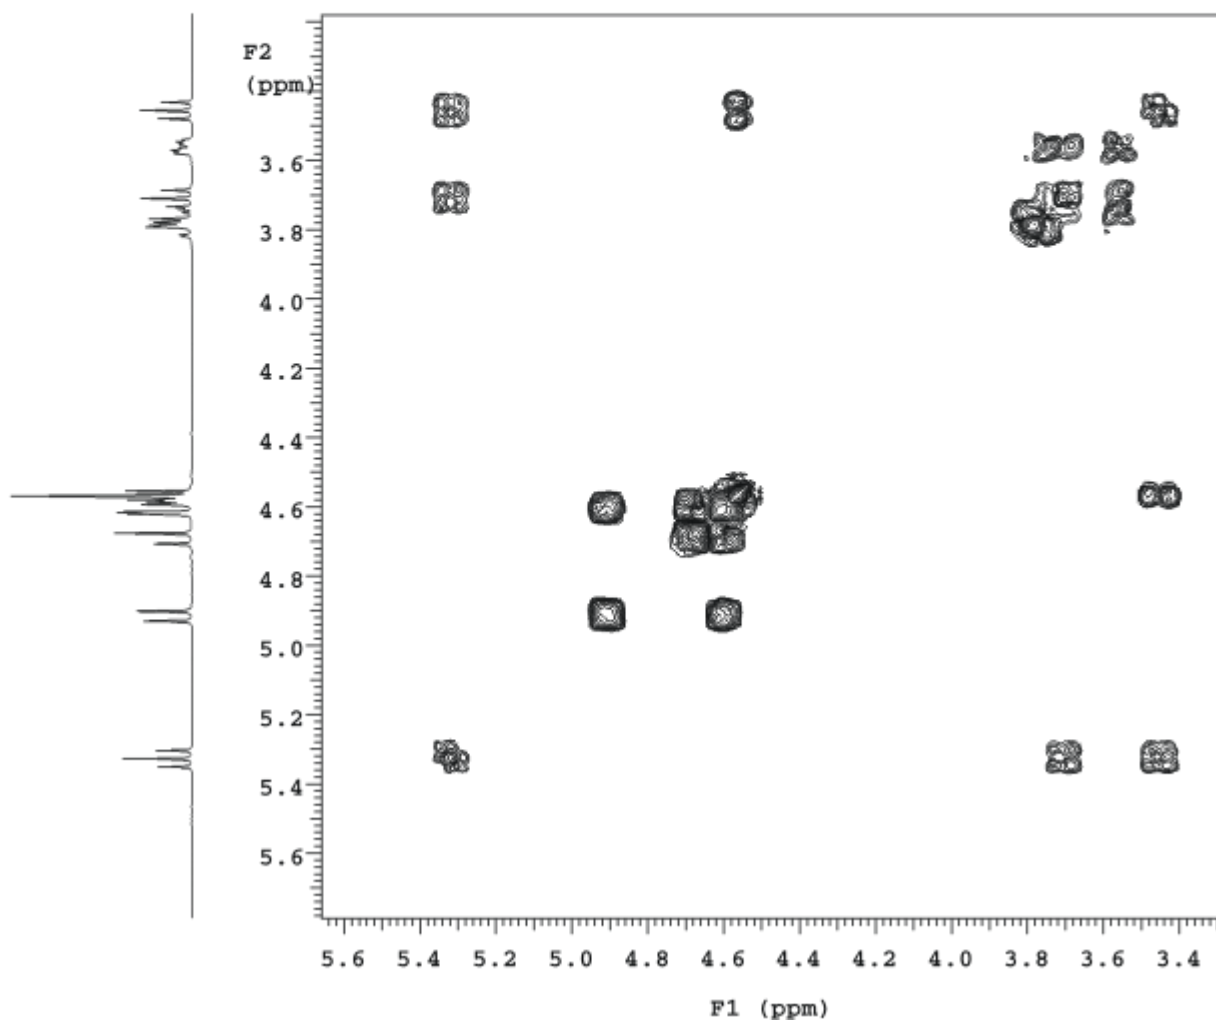

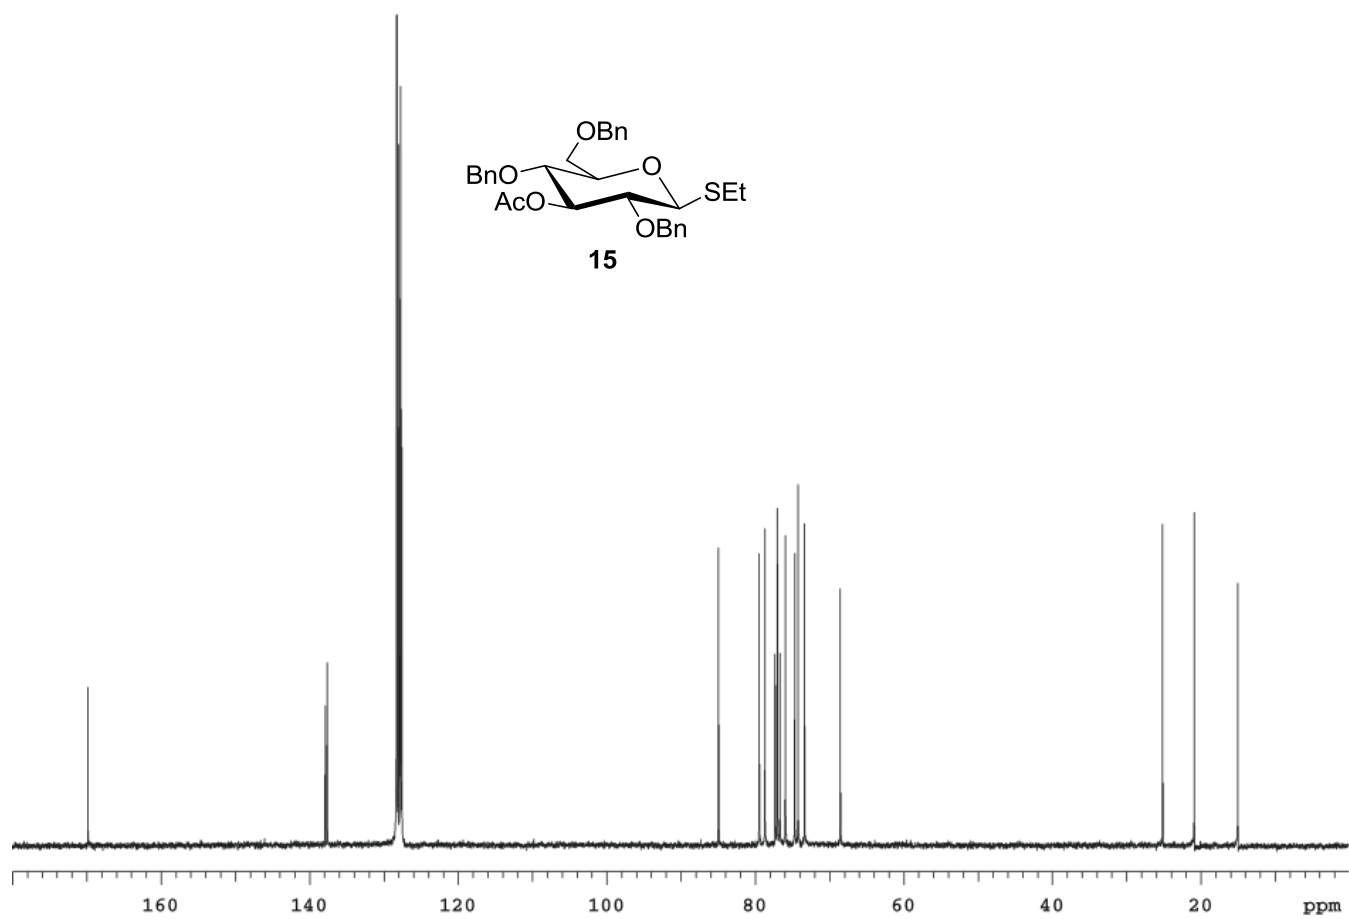

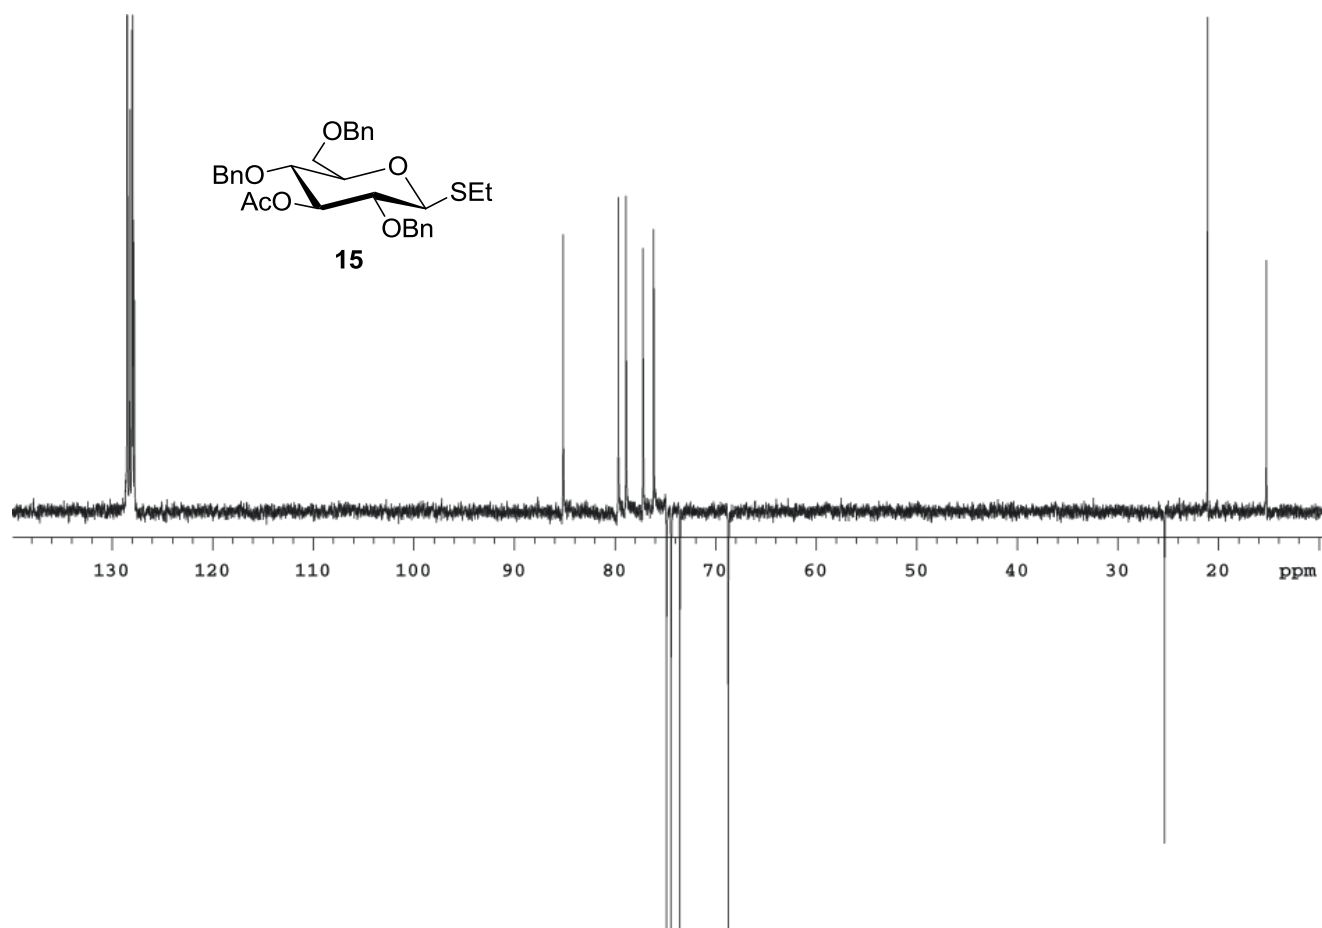

Sample: kms130\_2005-08-24

Filename: gHETCOR\_01

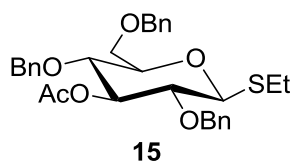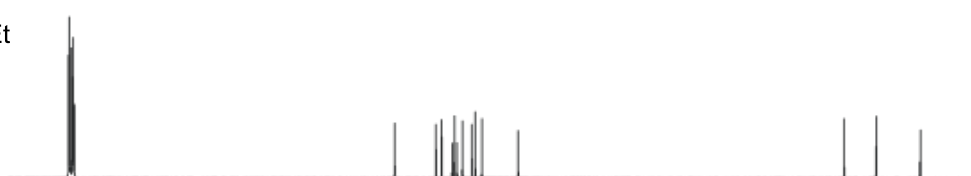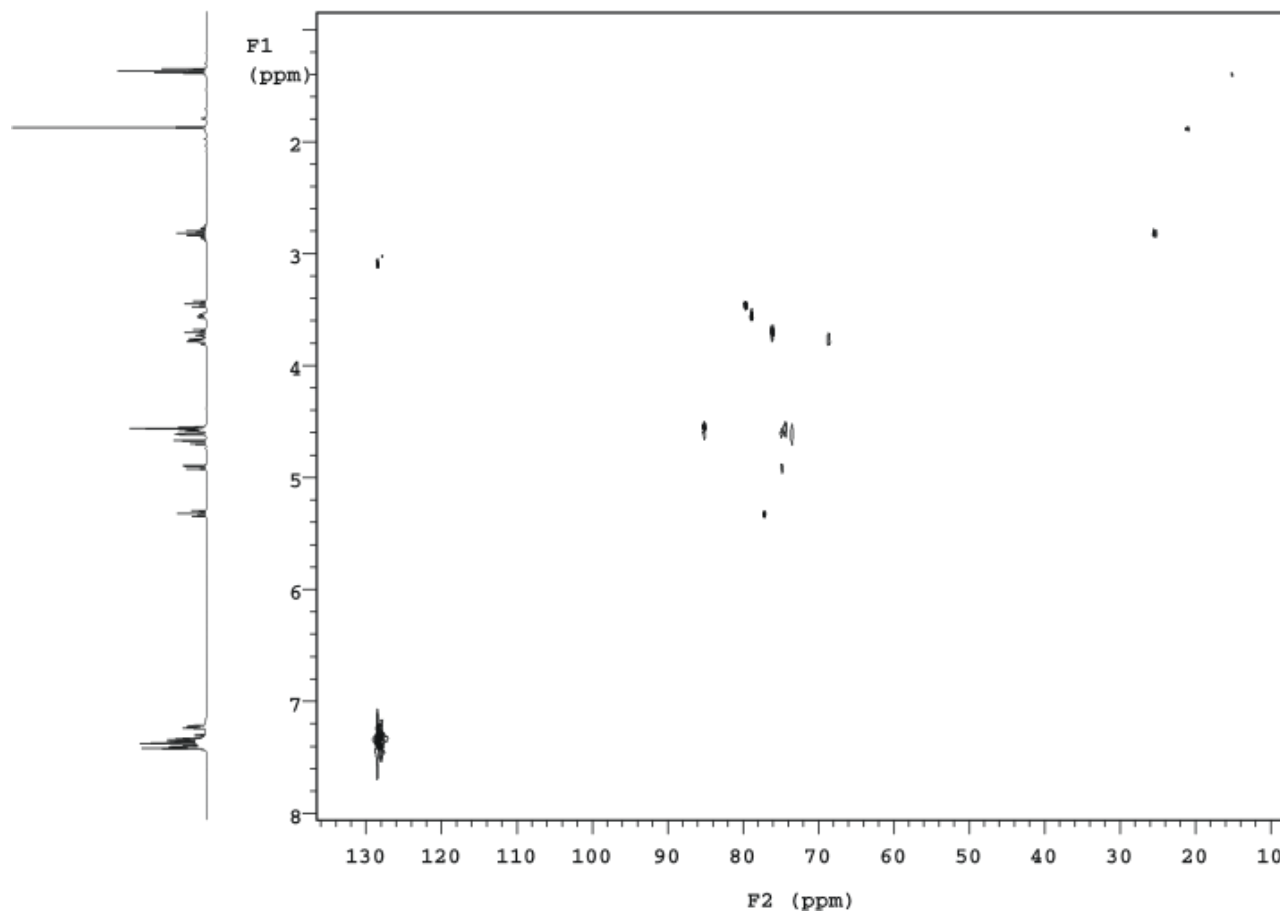

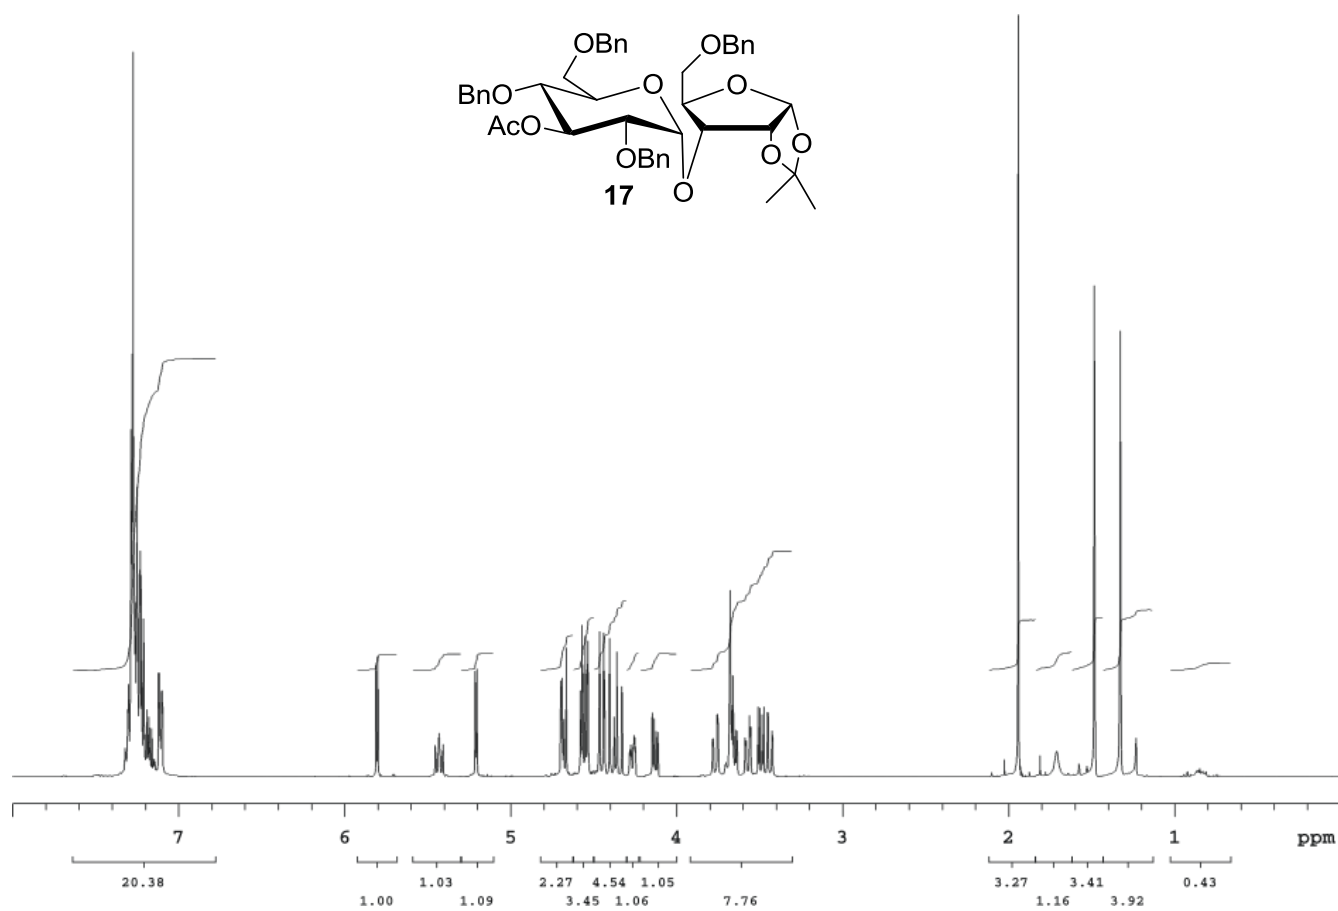

Sample: kms133\_2005-09-05

Filename: gCOSY\_01

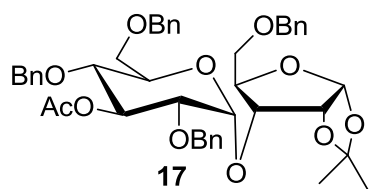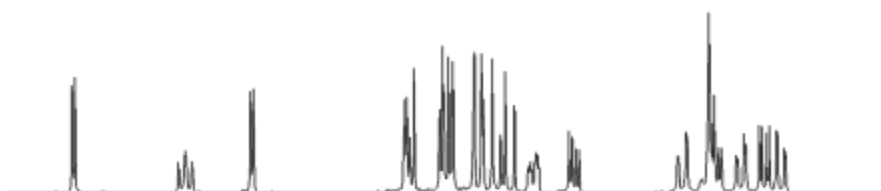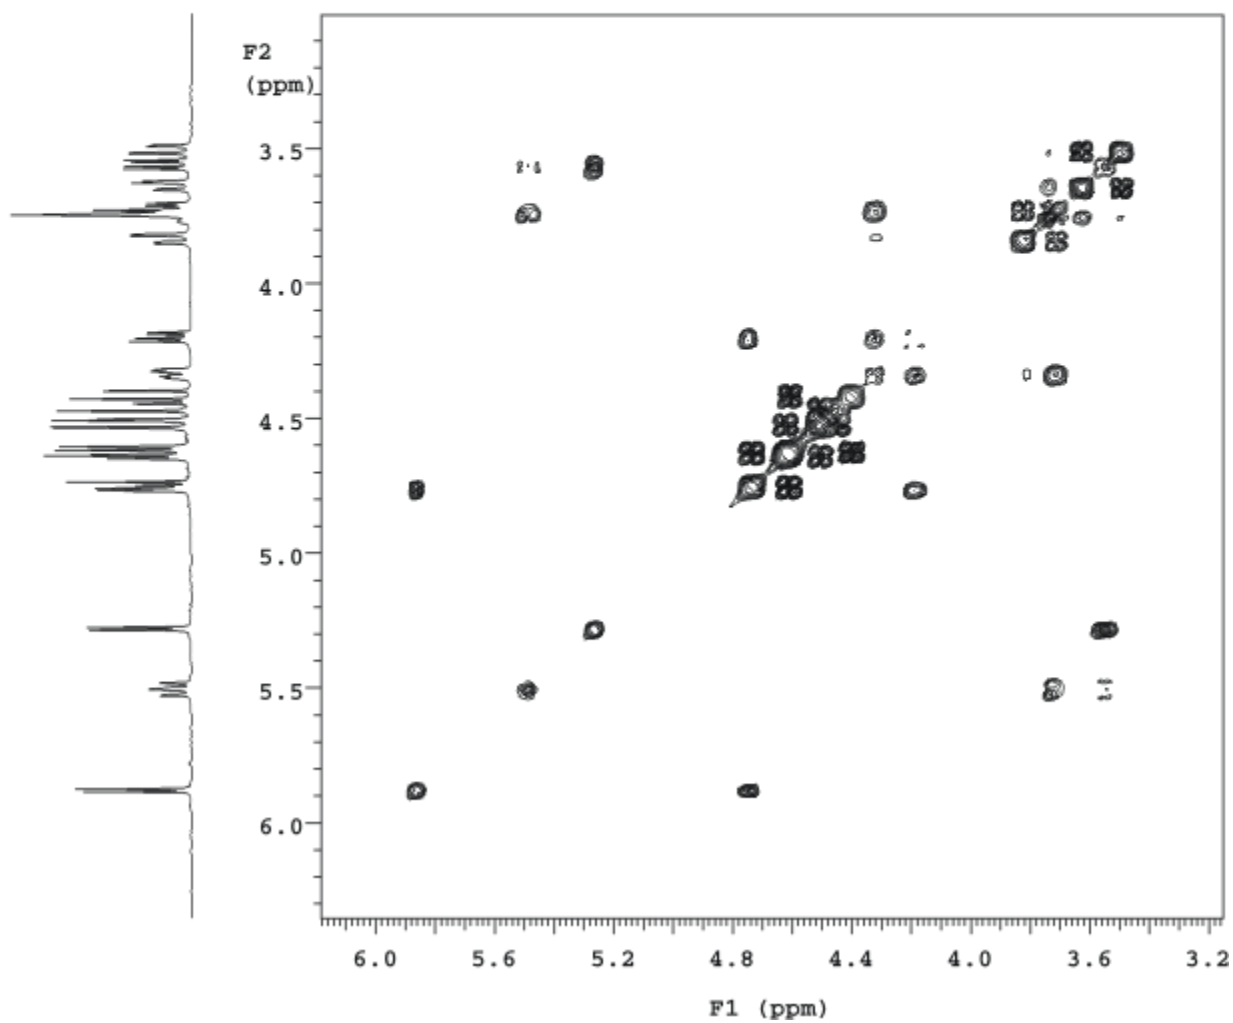

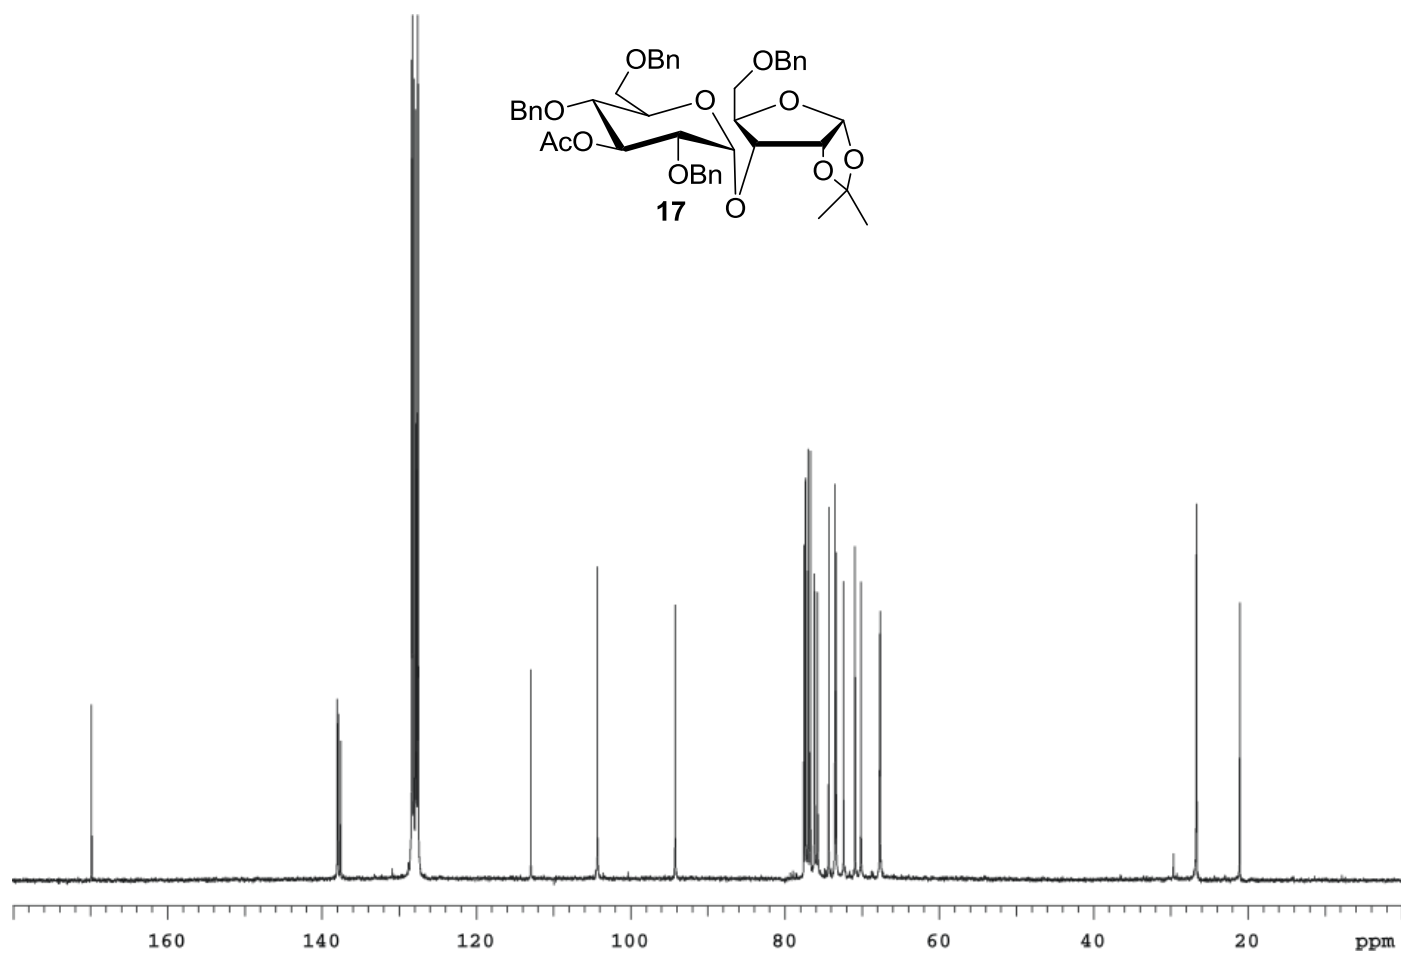



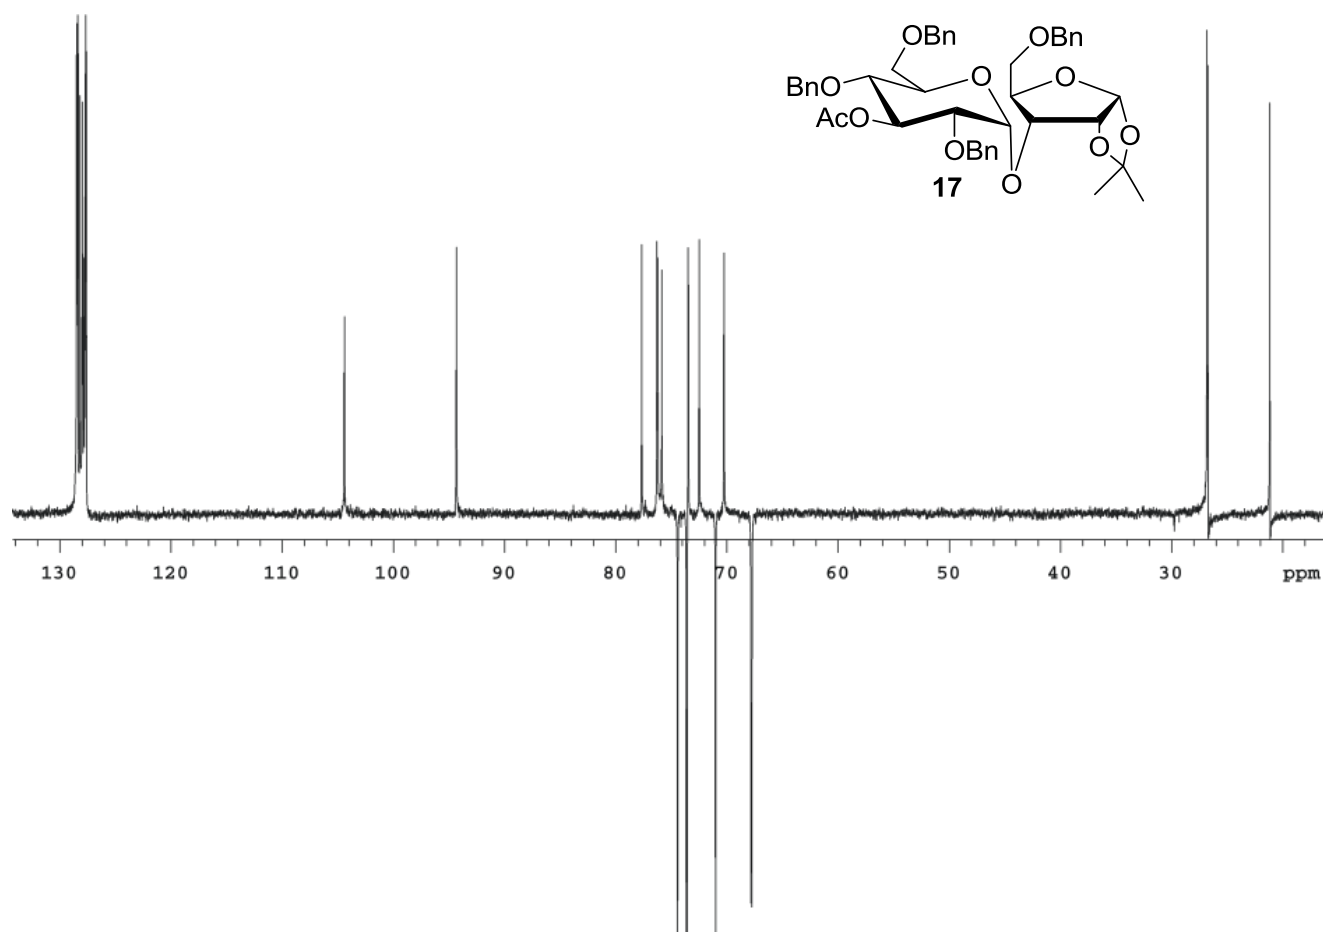

Sample: kms133\_2005-09-05

Filename: gHMQC\_01

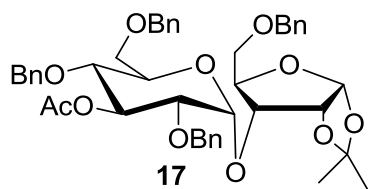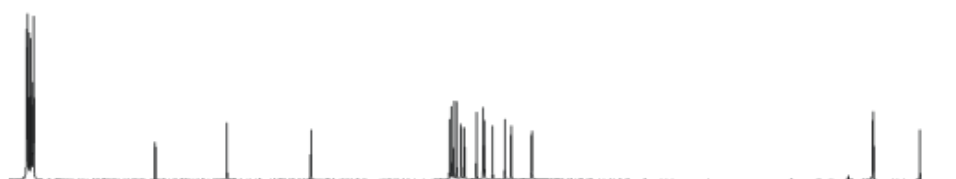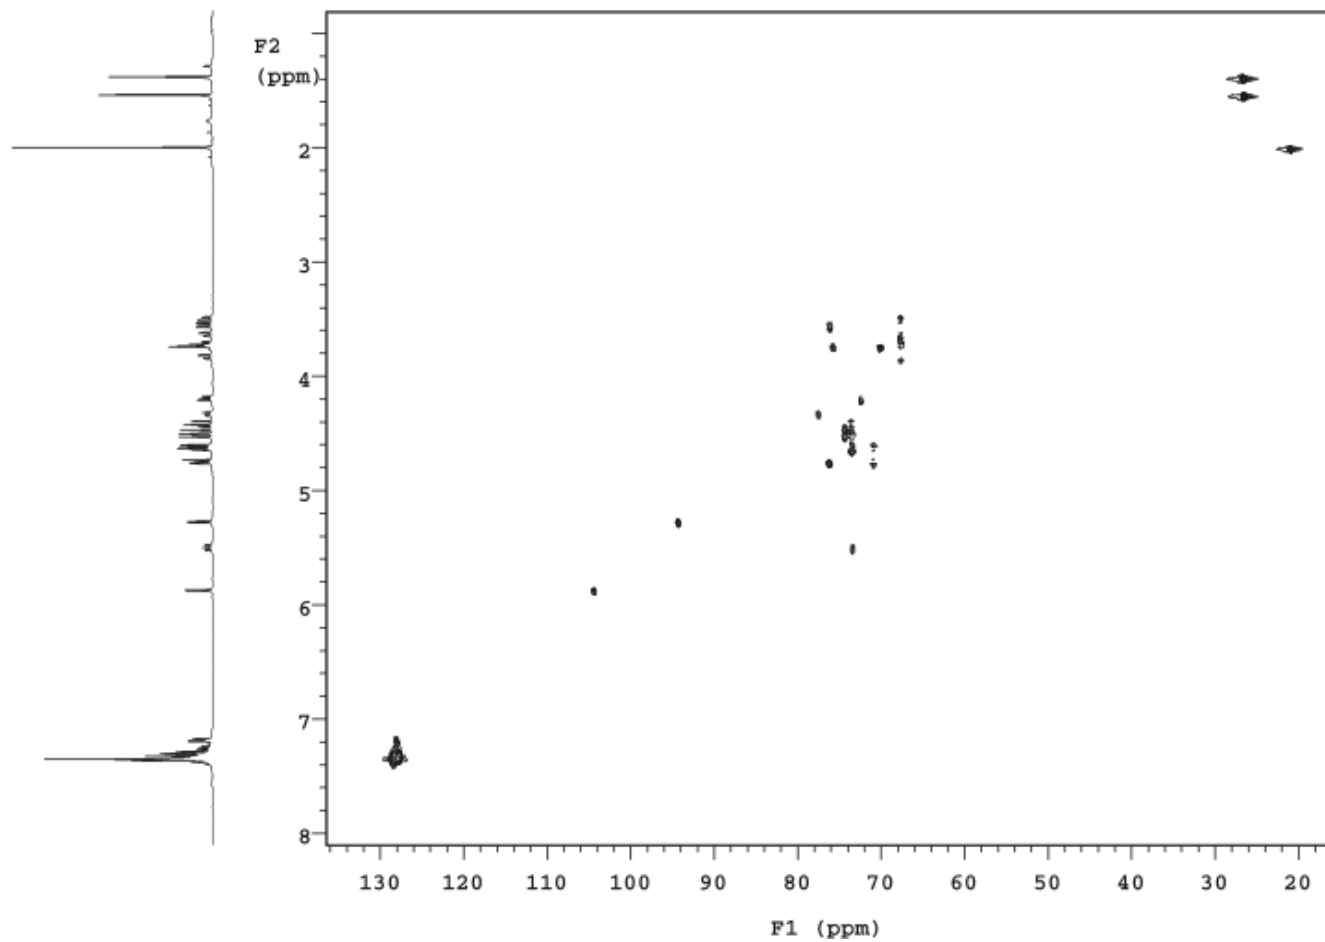

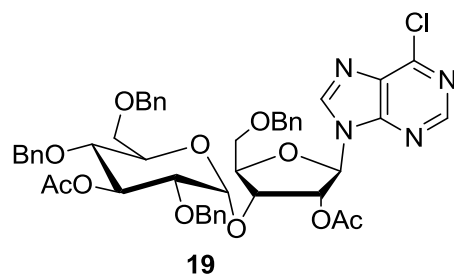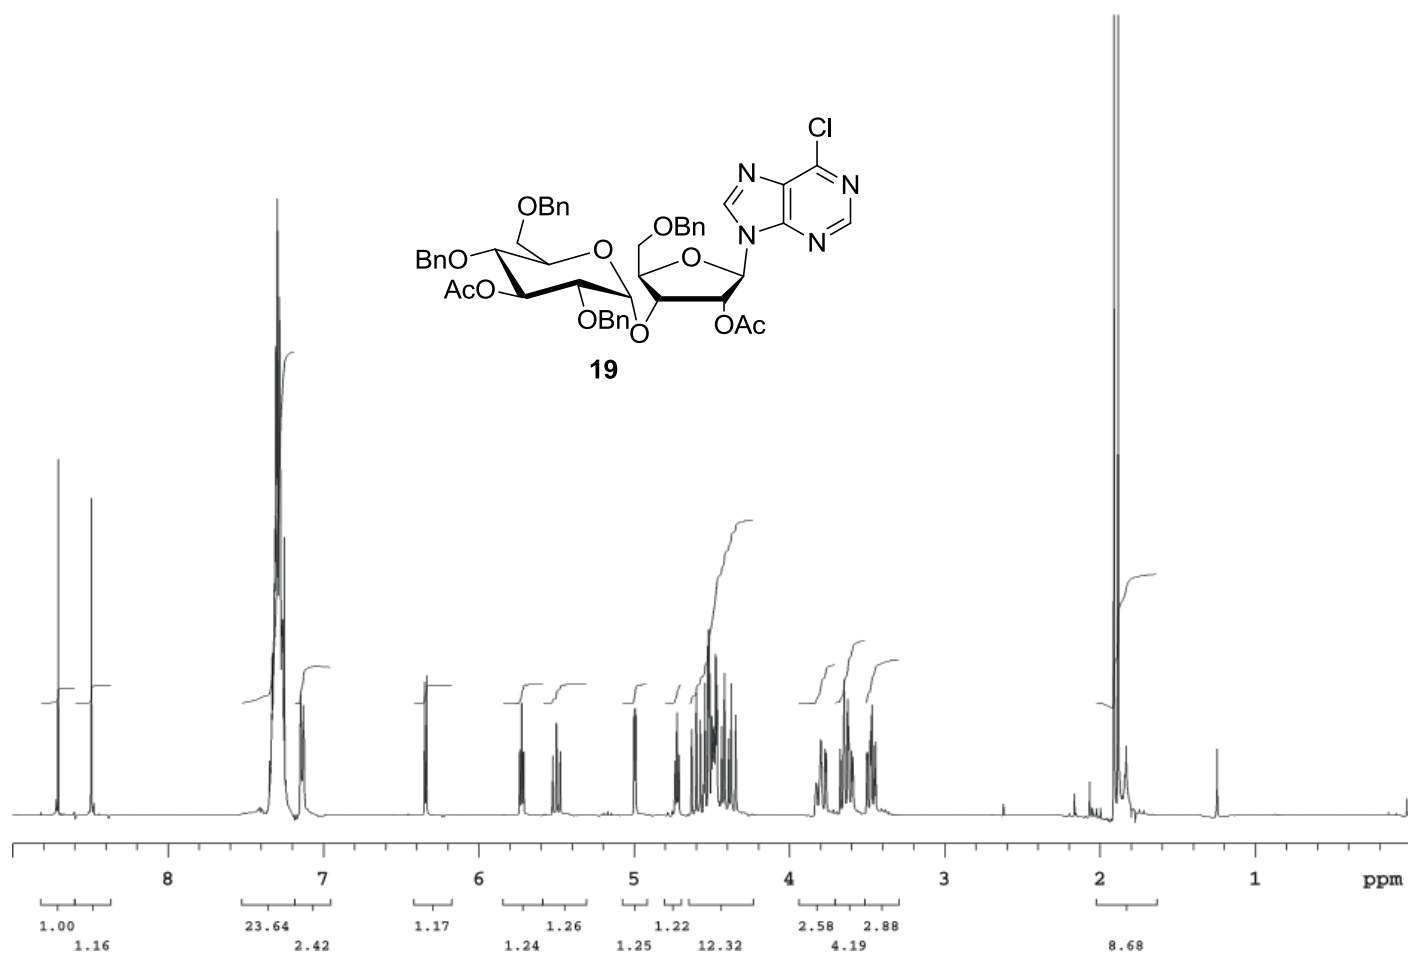

Sample: kms136\_2005-09-13

Filename: gCOSY\_01

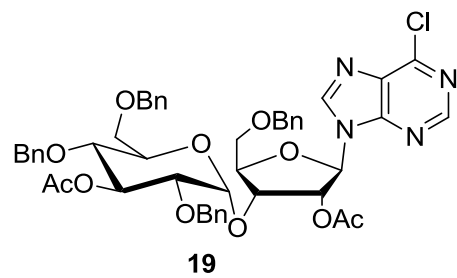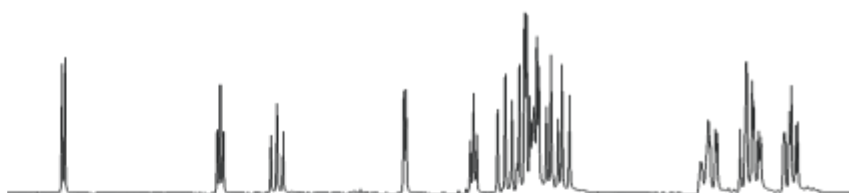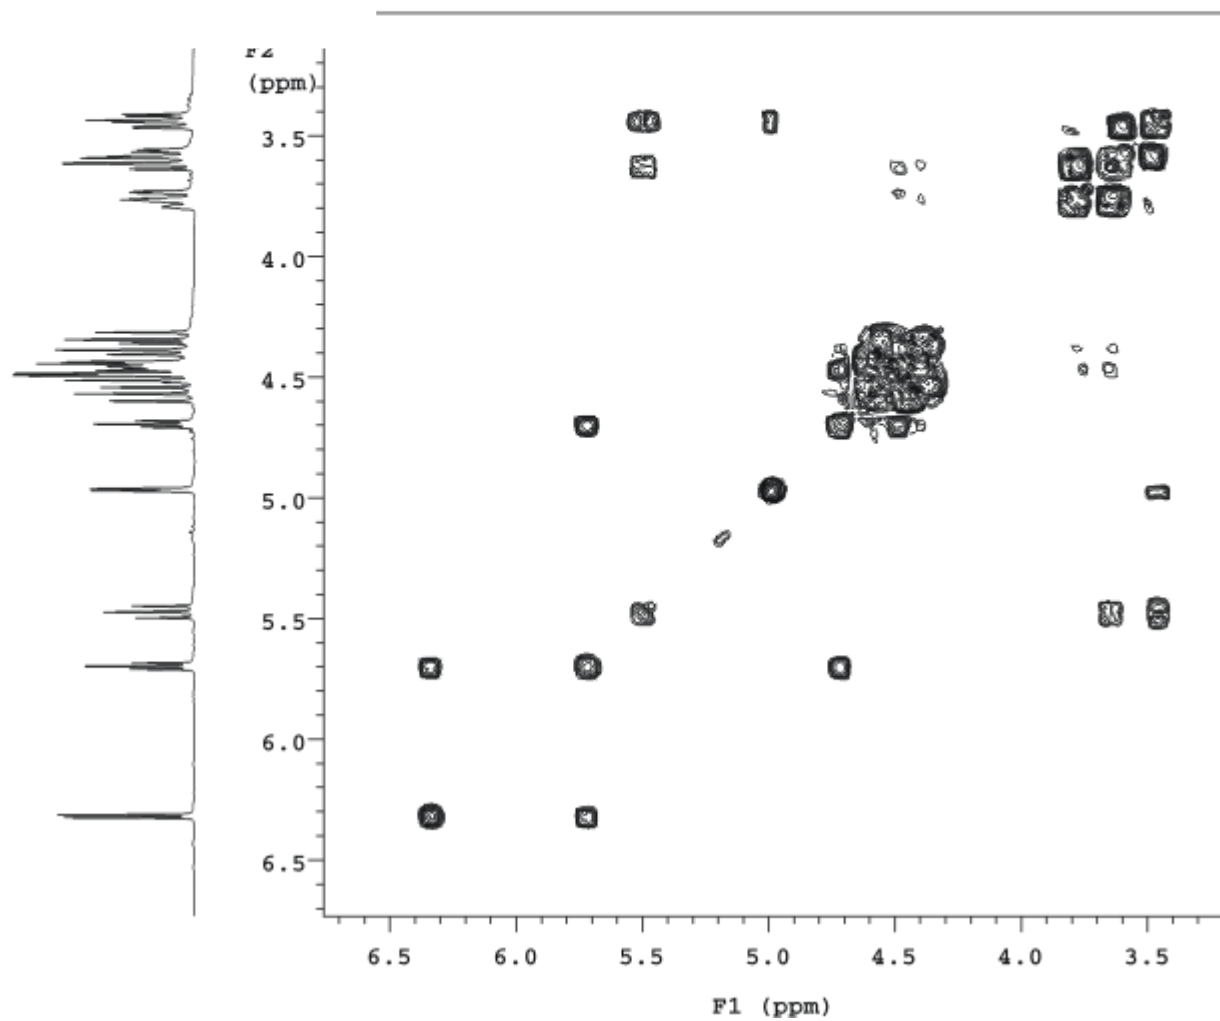

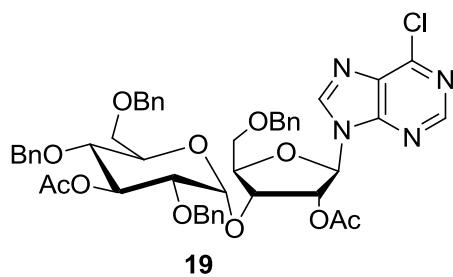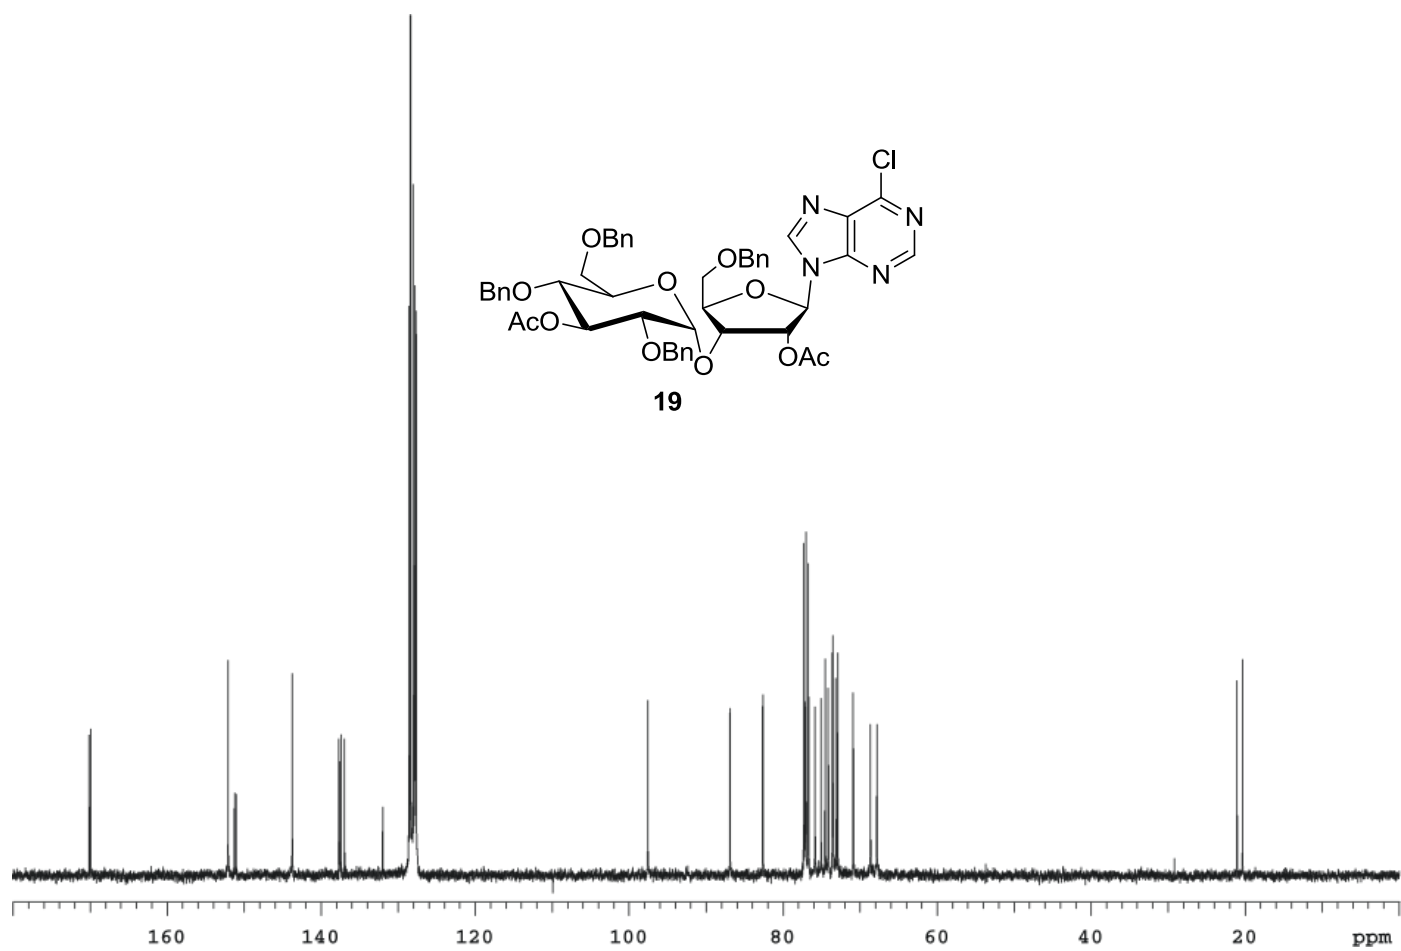

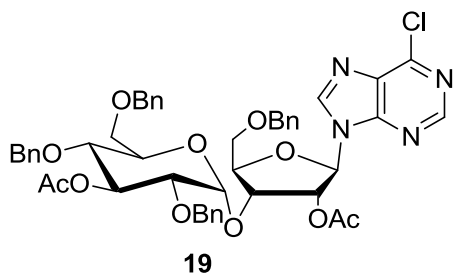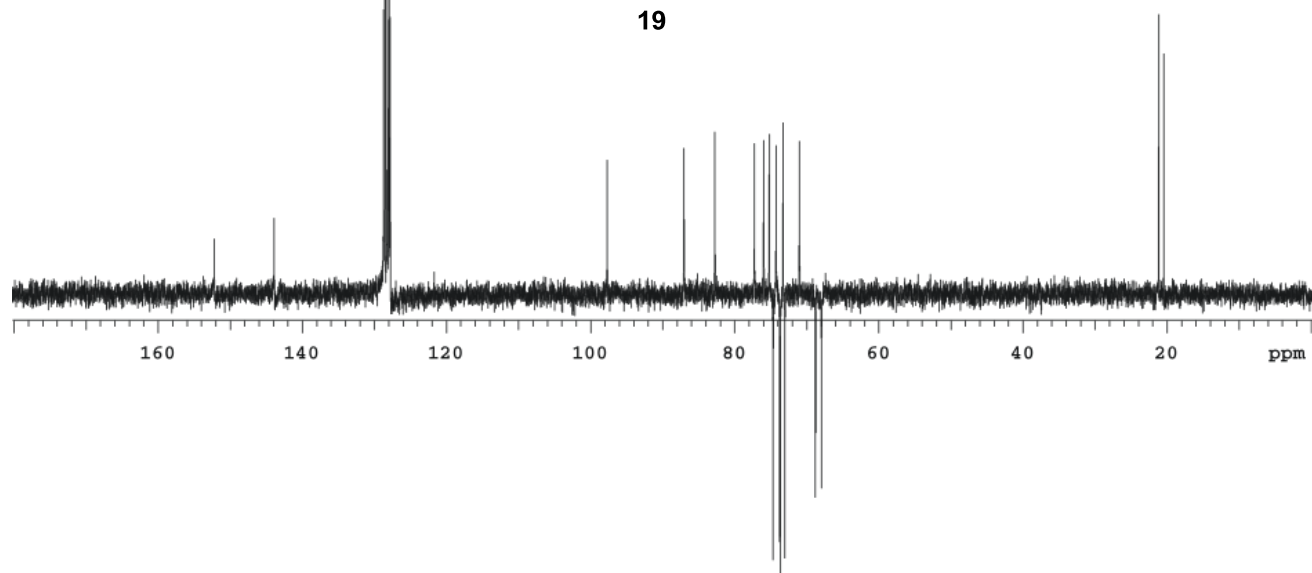

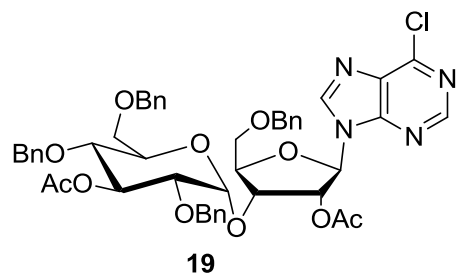

Filename: gHMQC\_01

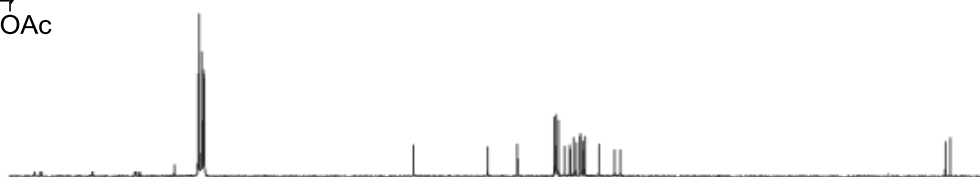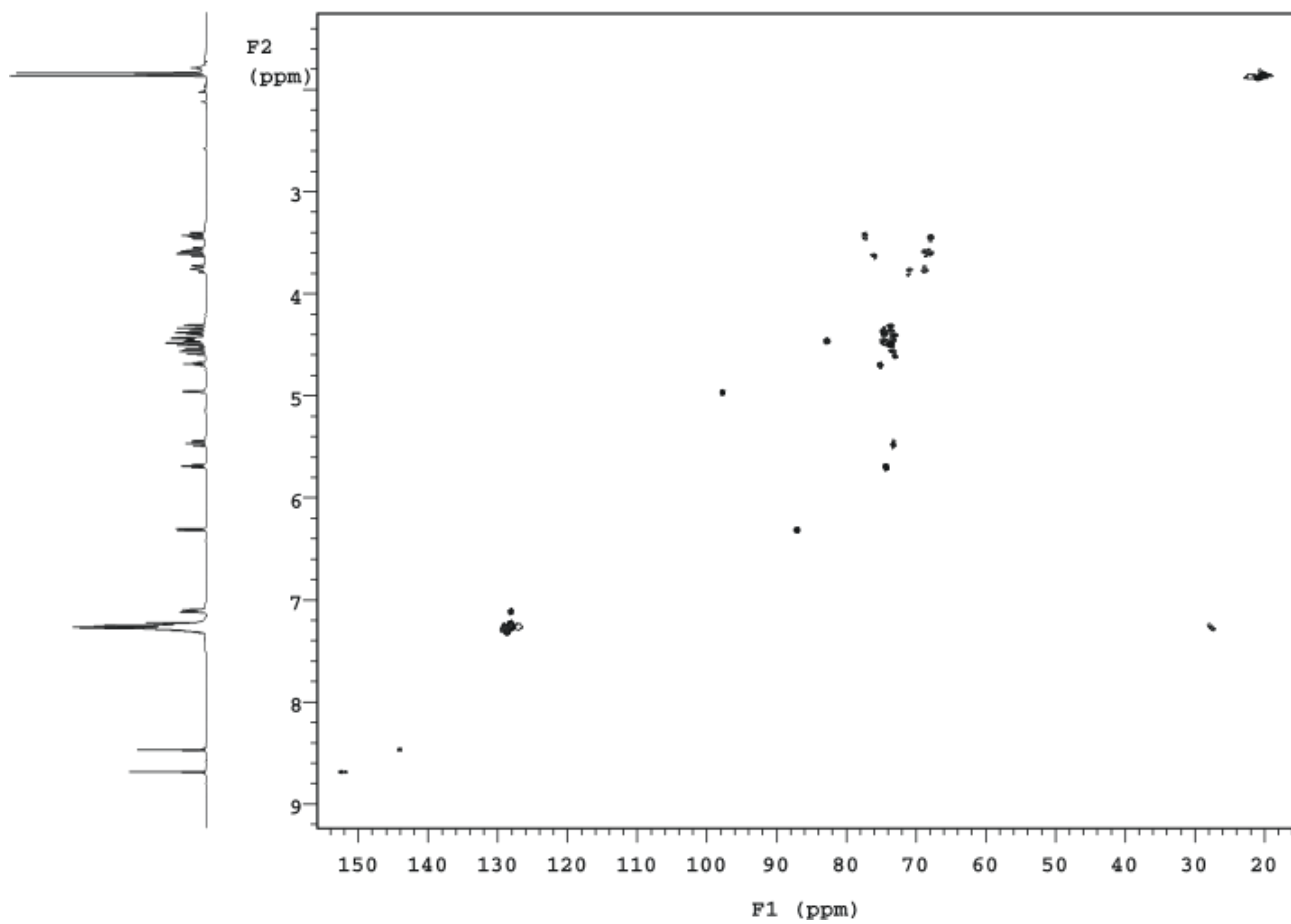

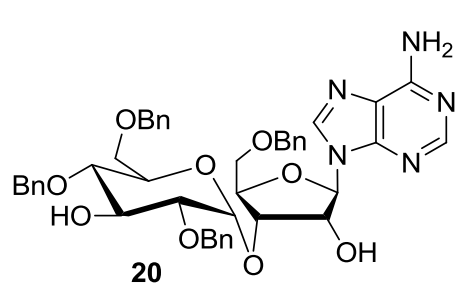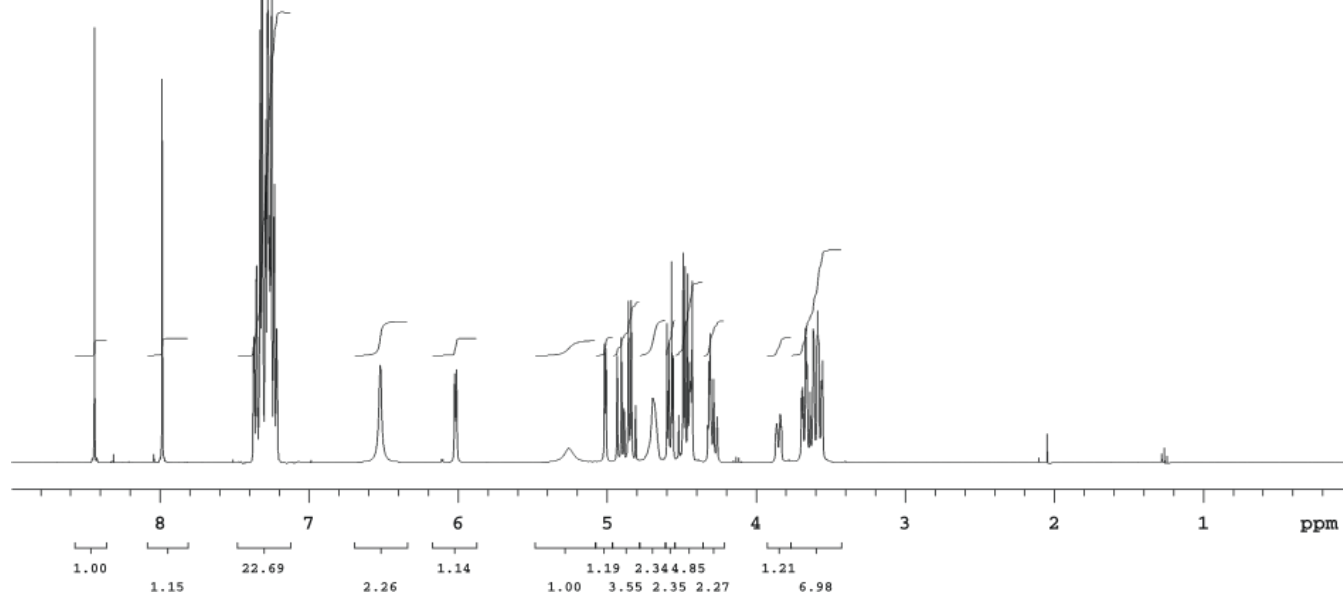



Sample: kms138a\_2005-10-05

Filename: gCOSY\_01

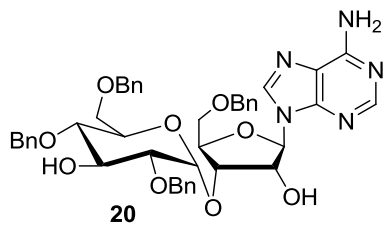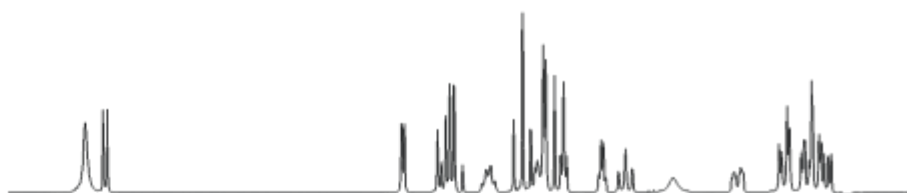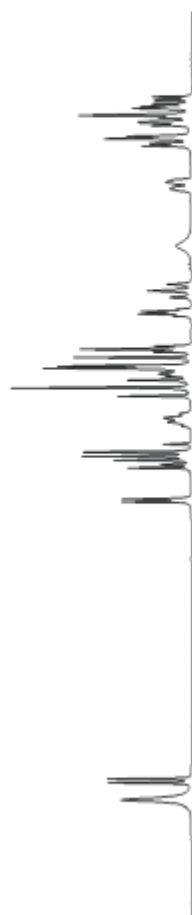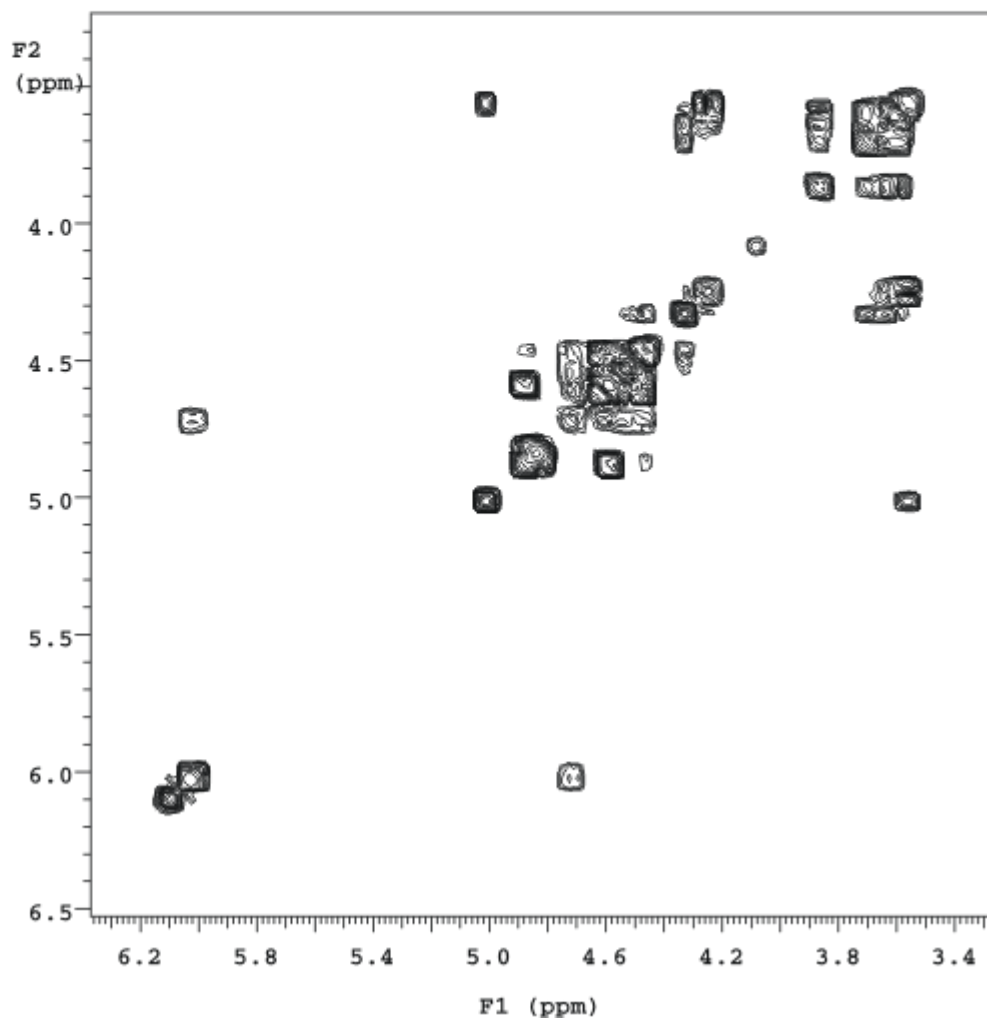

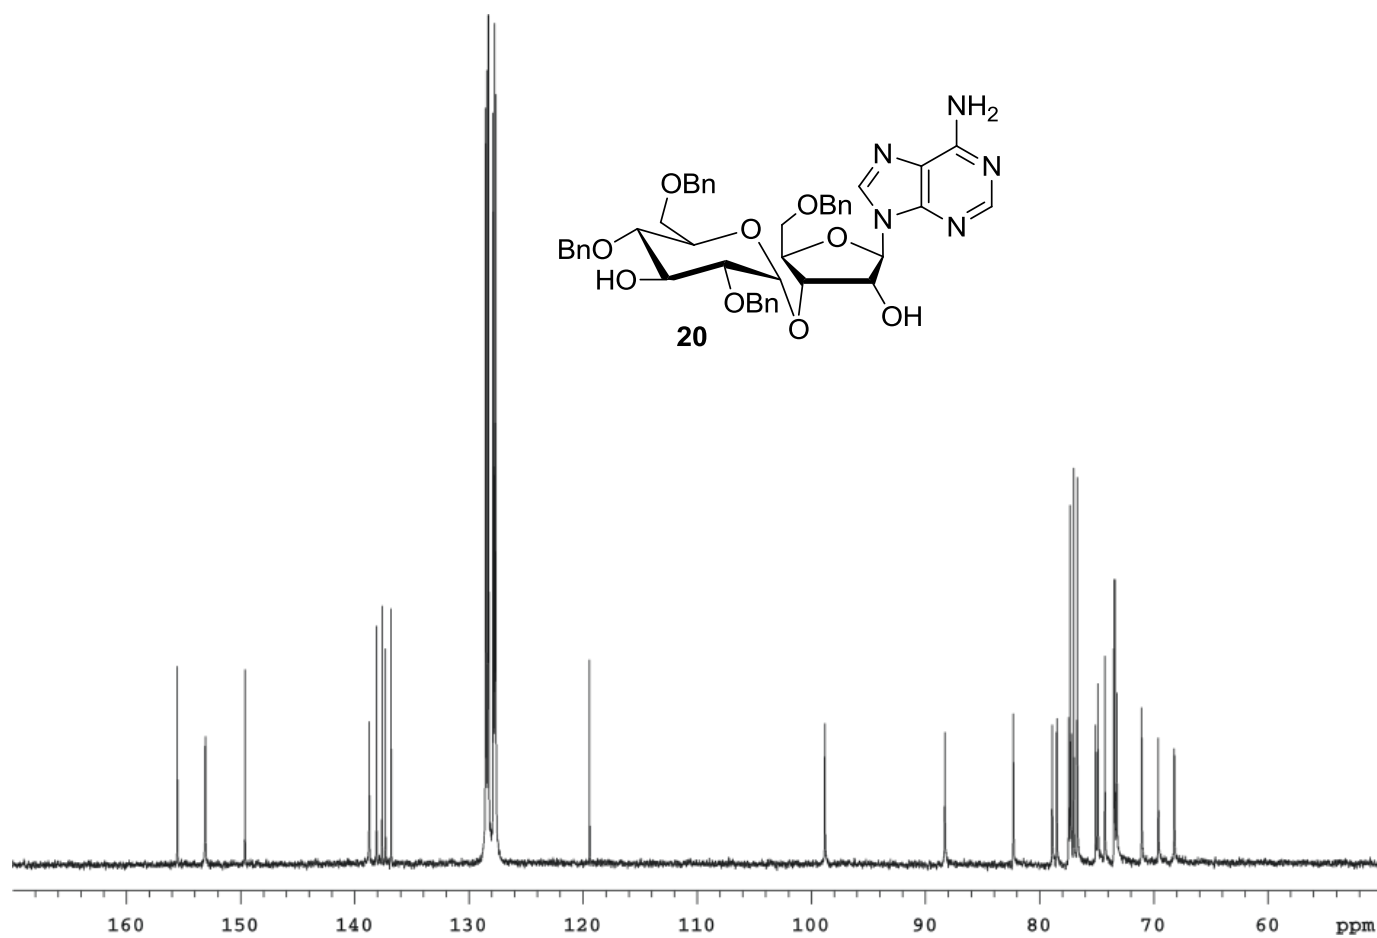

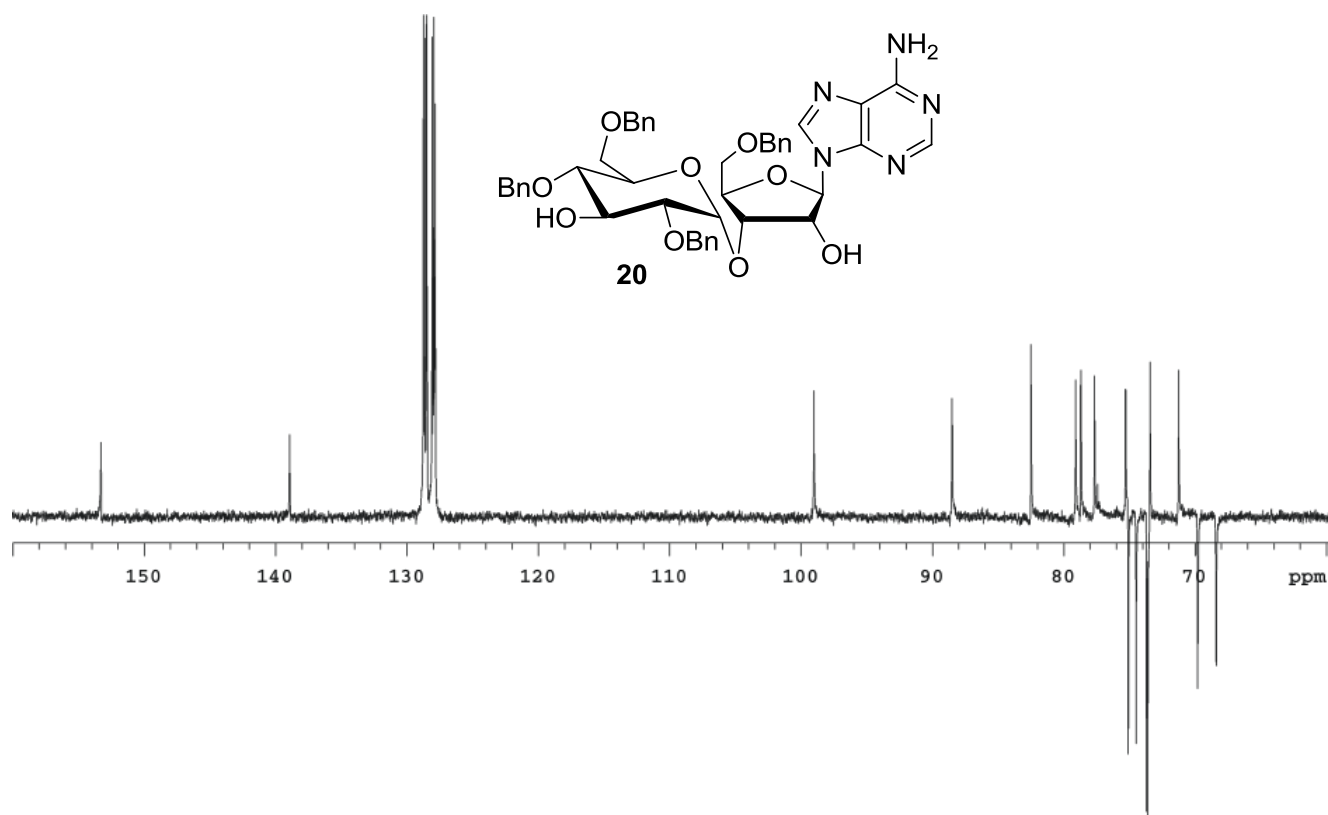

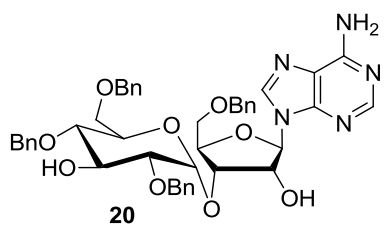

Filename: gHMQC\_01

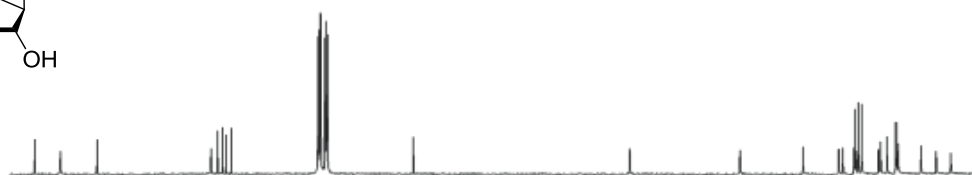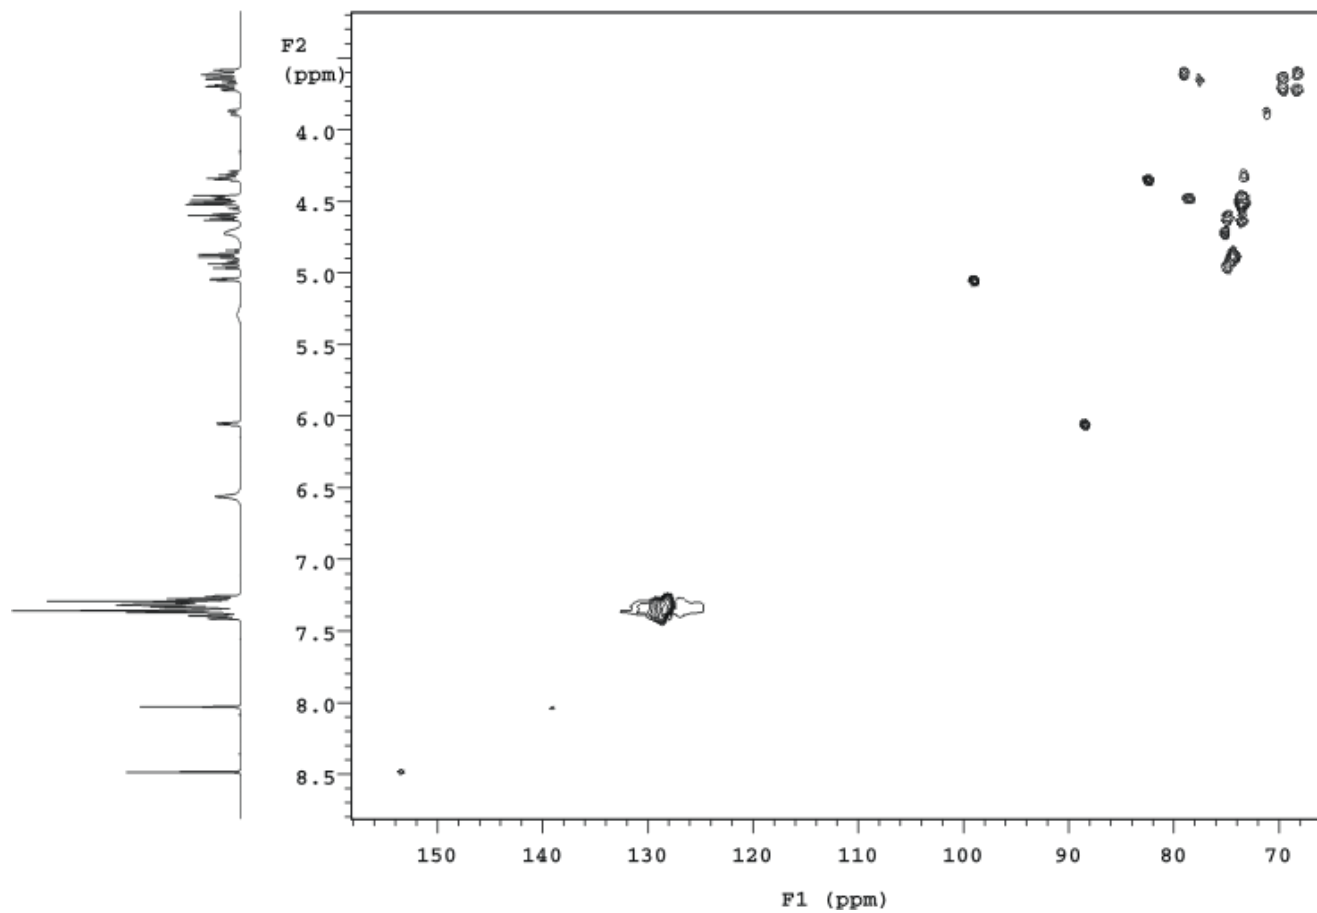

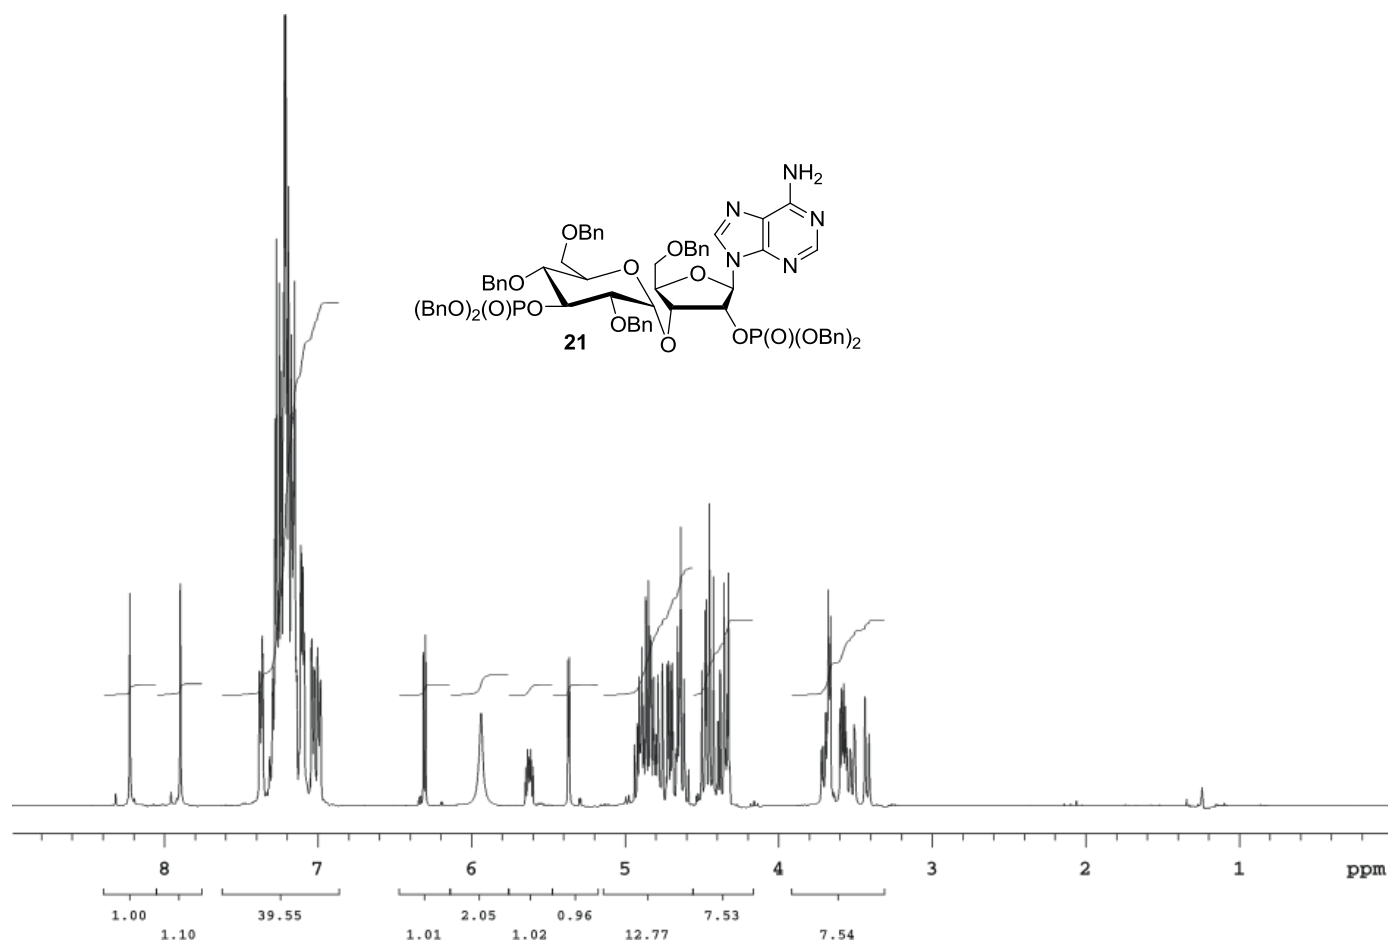

Sample: kms150a\_2005-11-15

Filename: gCOSY\_01

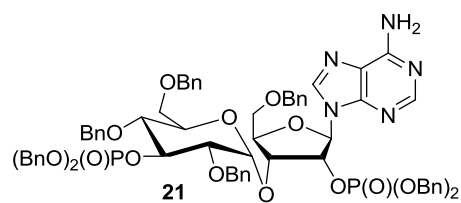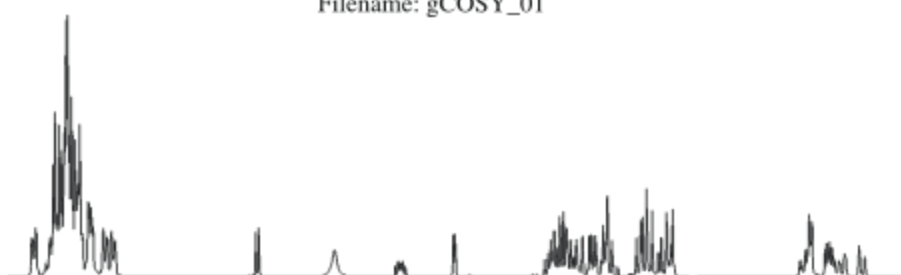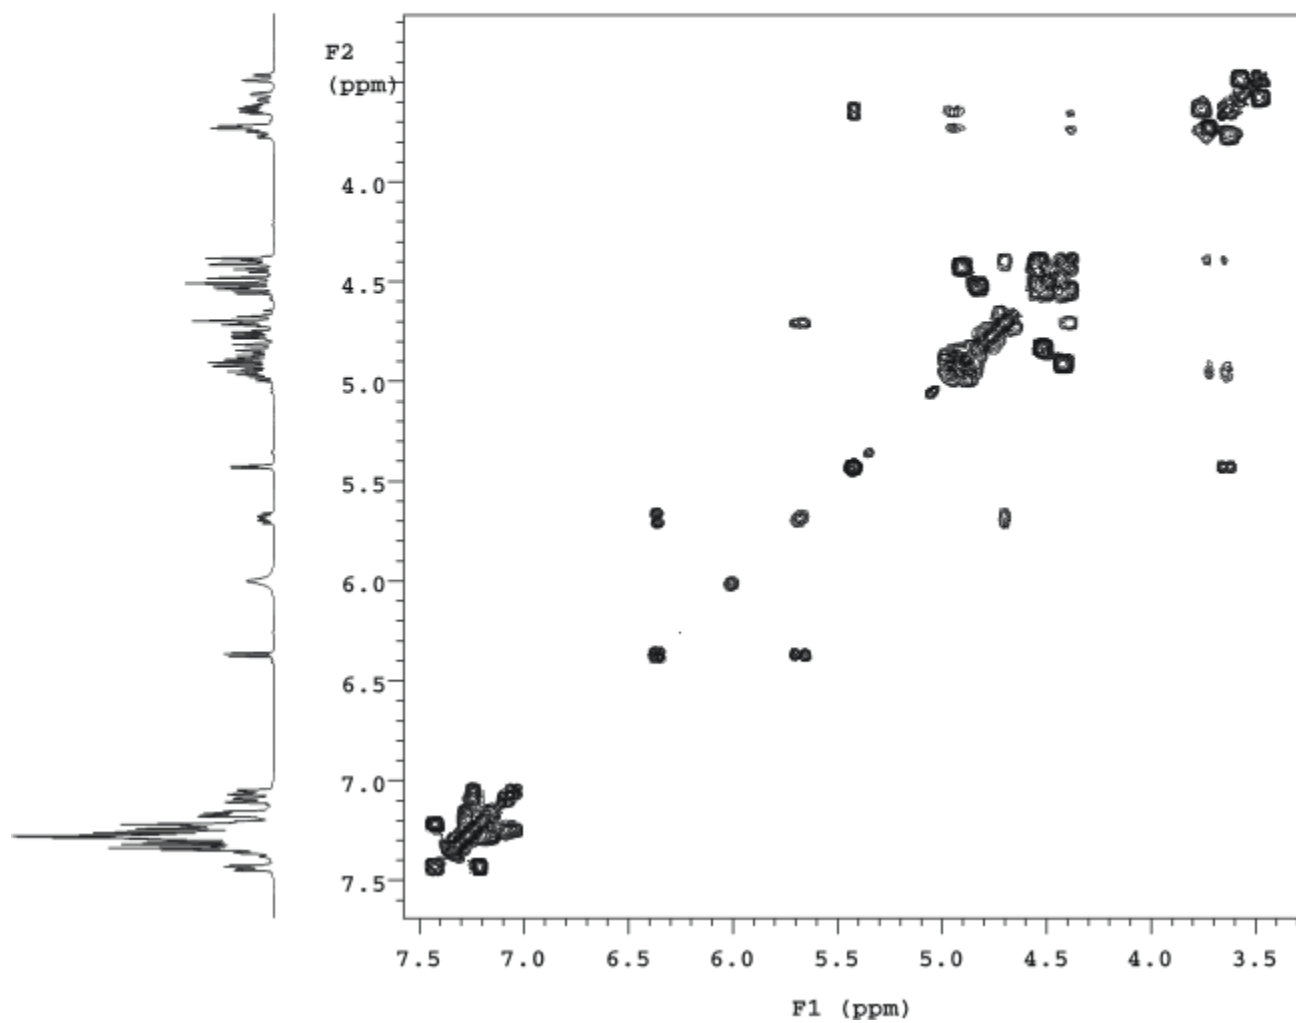

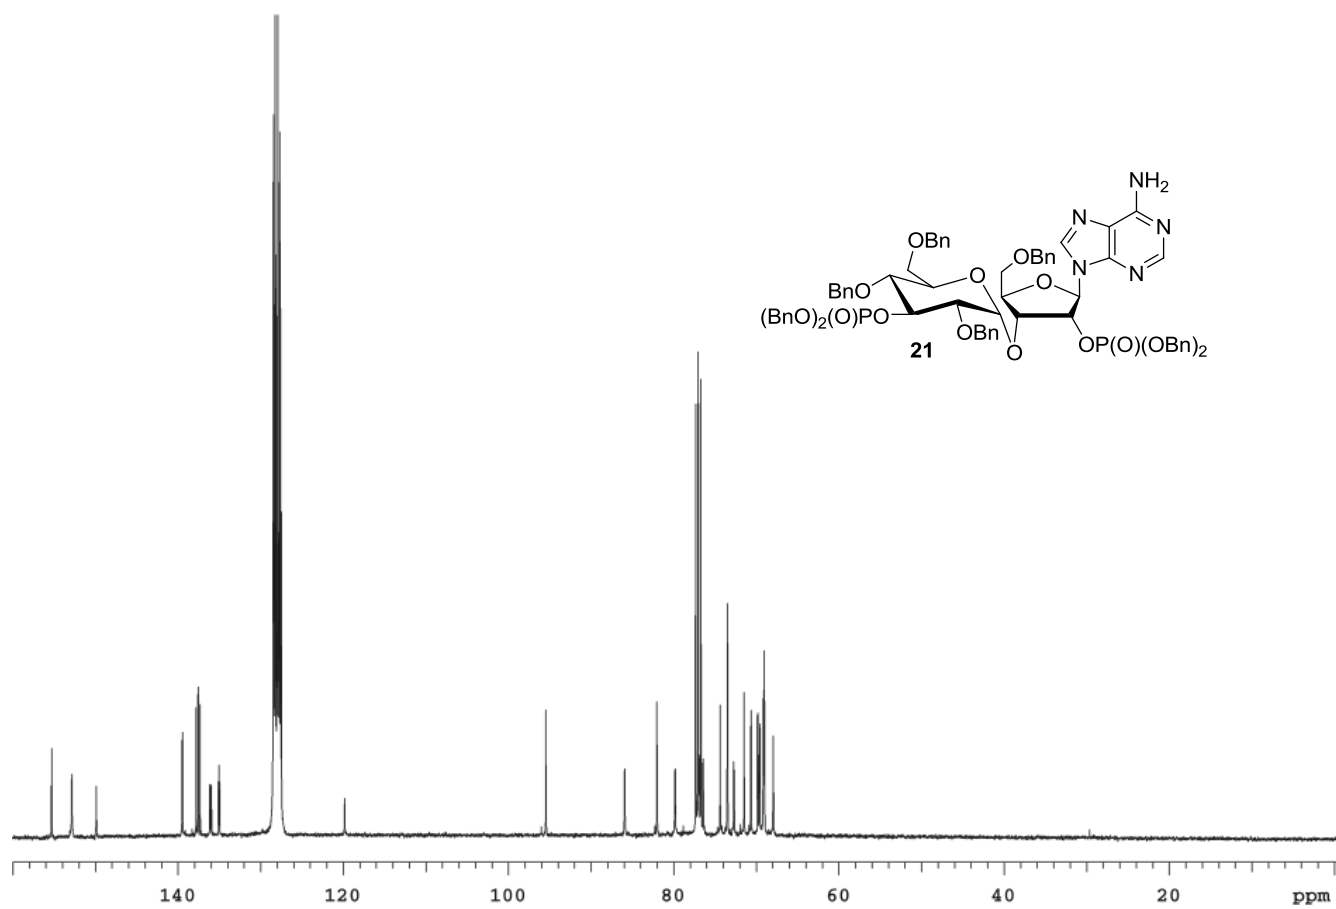

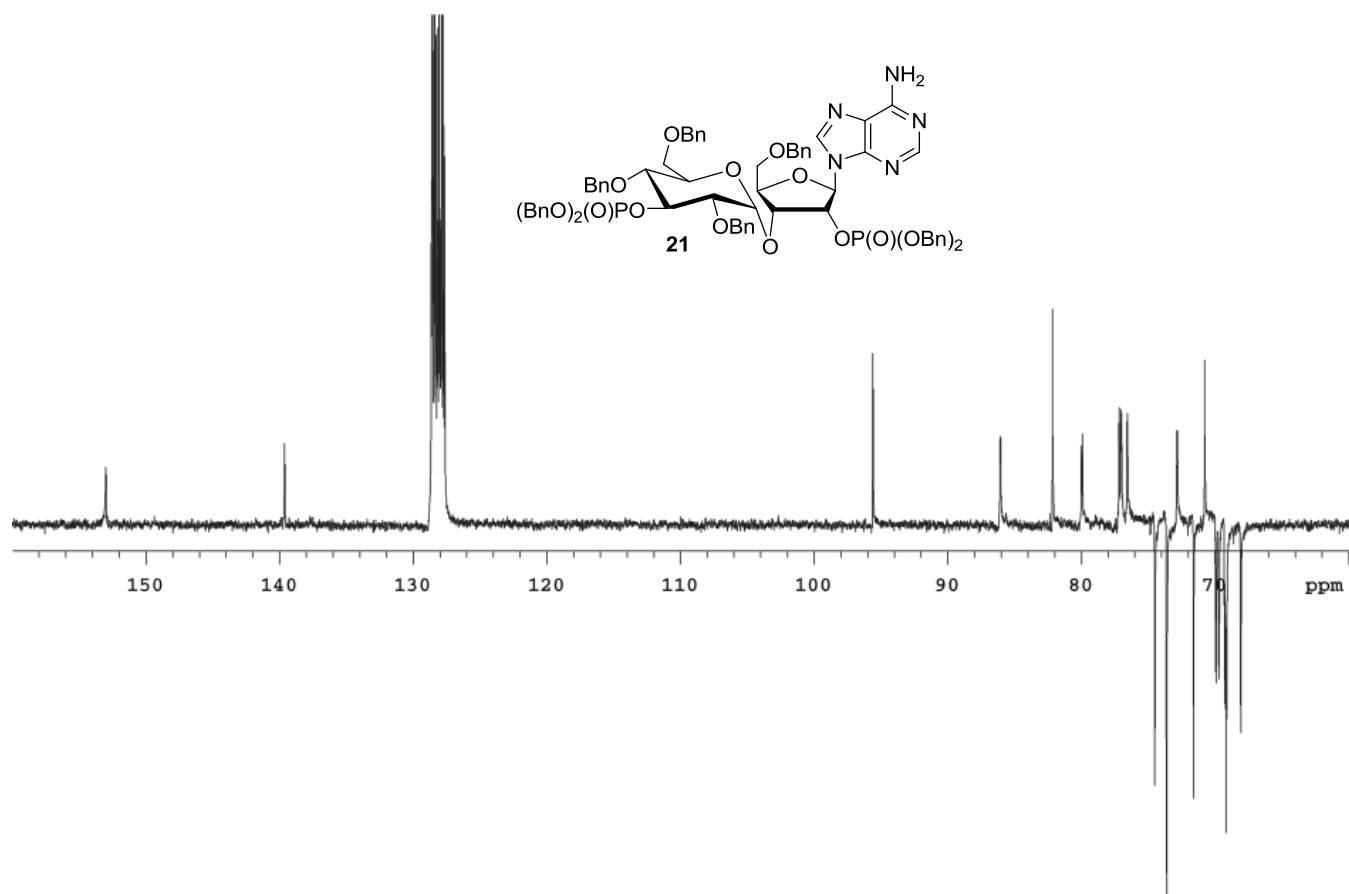



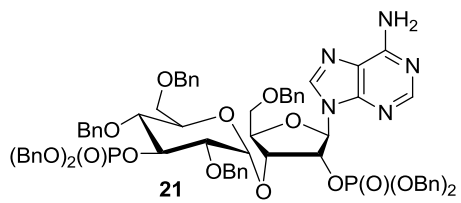

Filename: gHMQC\_01

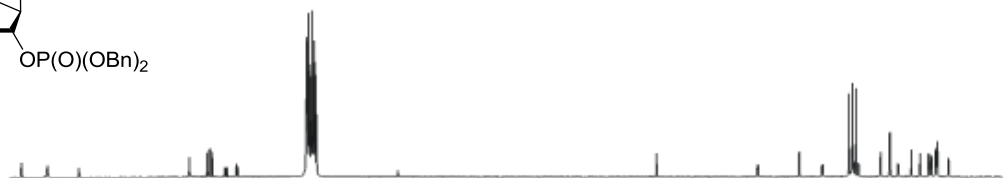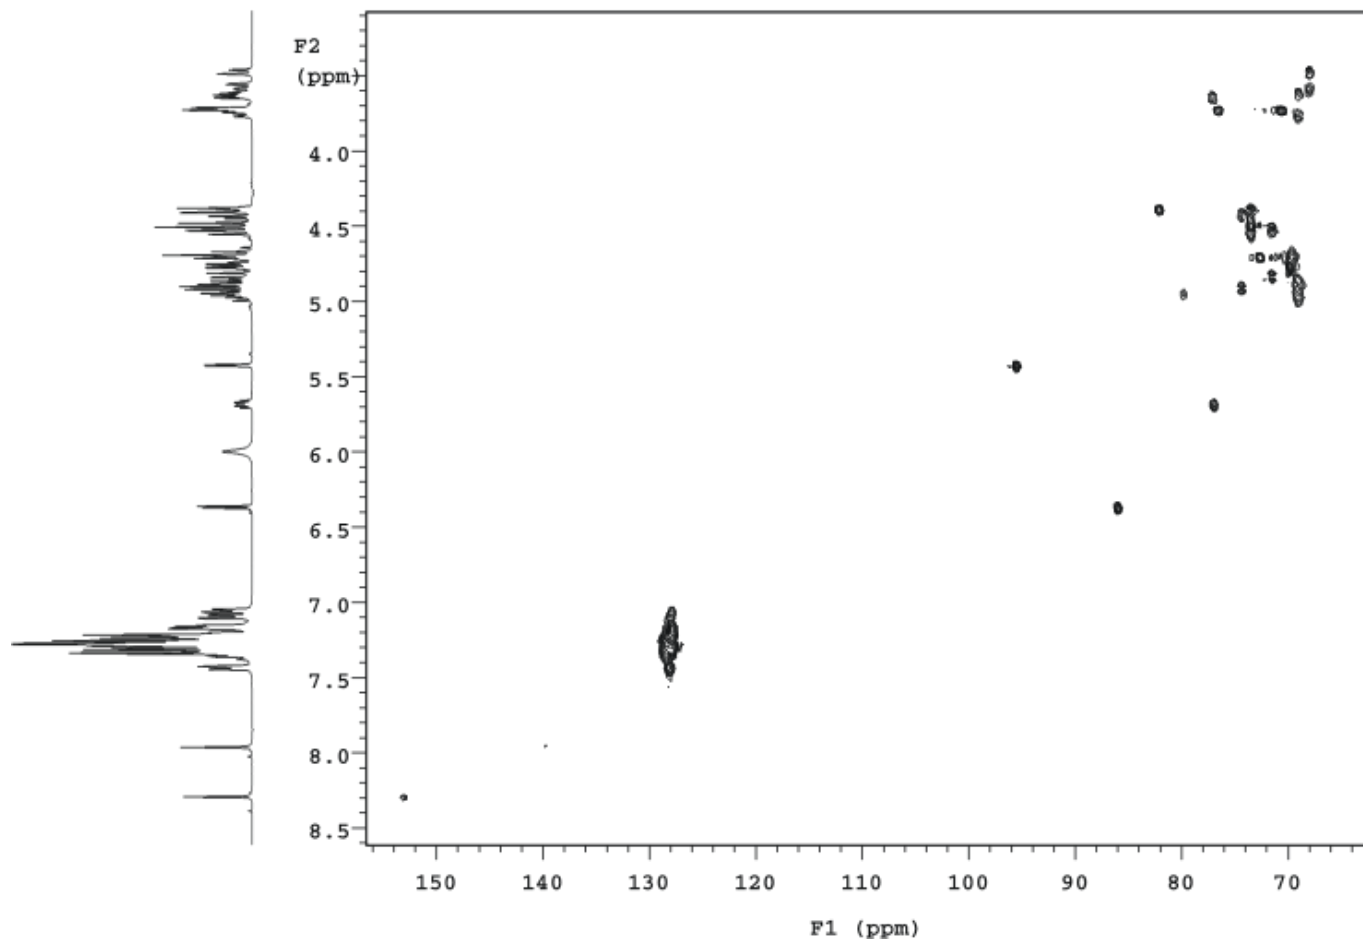

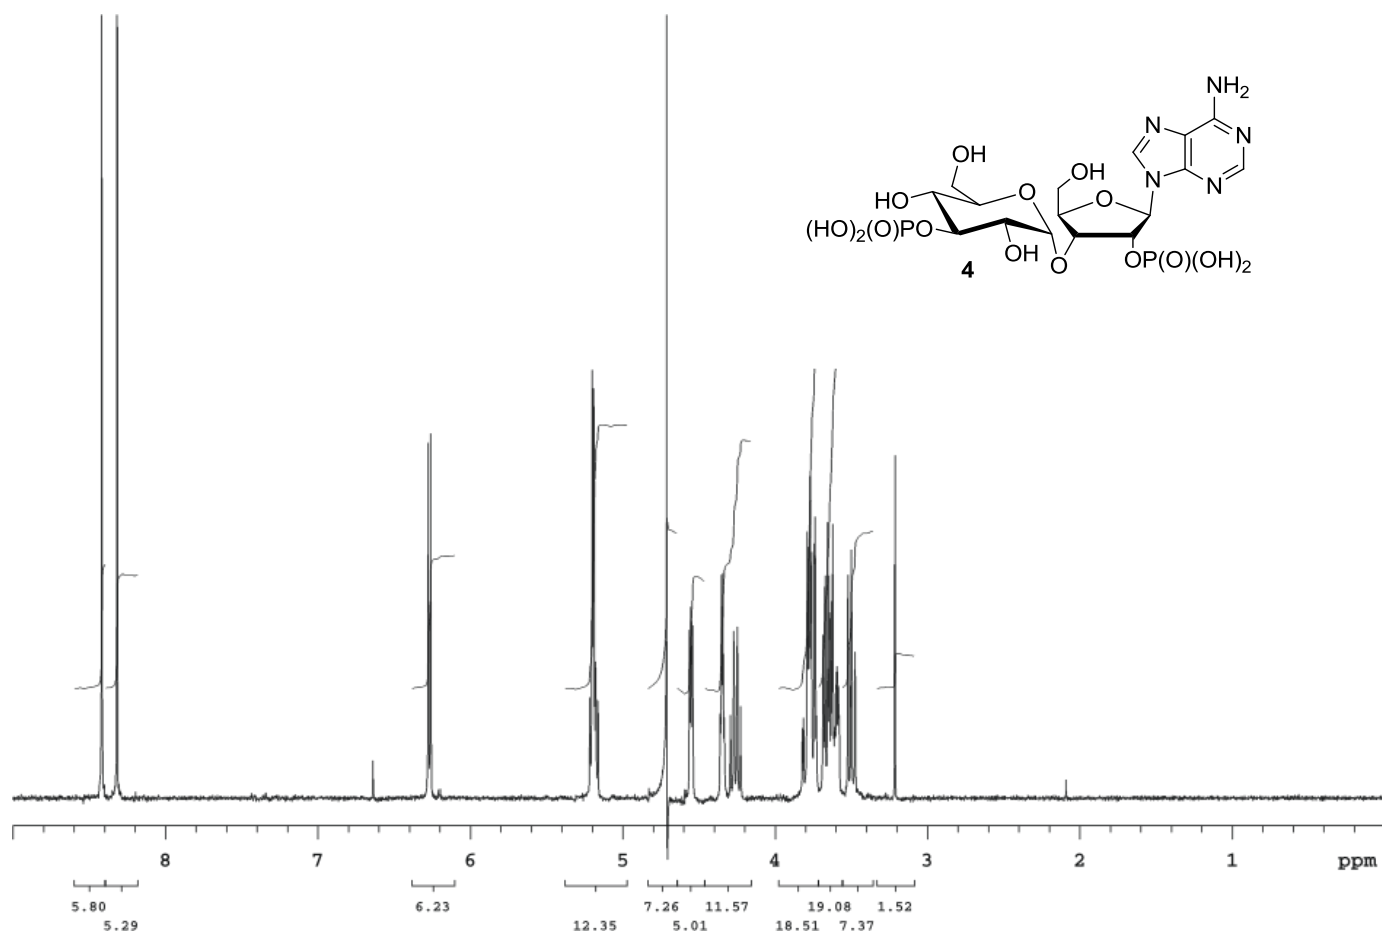

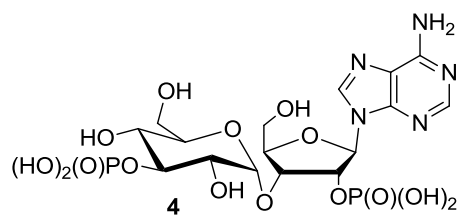

Filename: gCOSY\_01

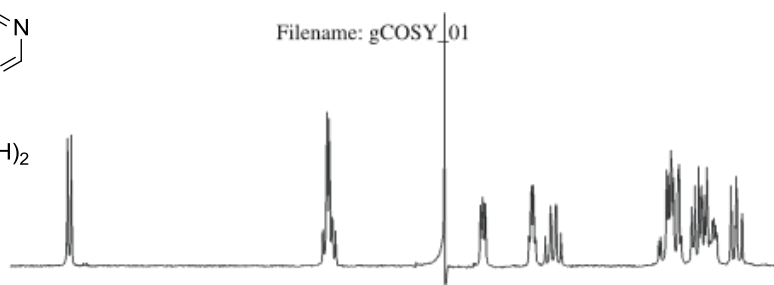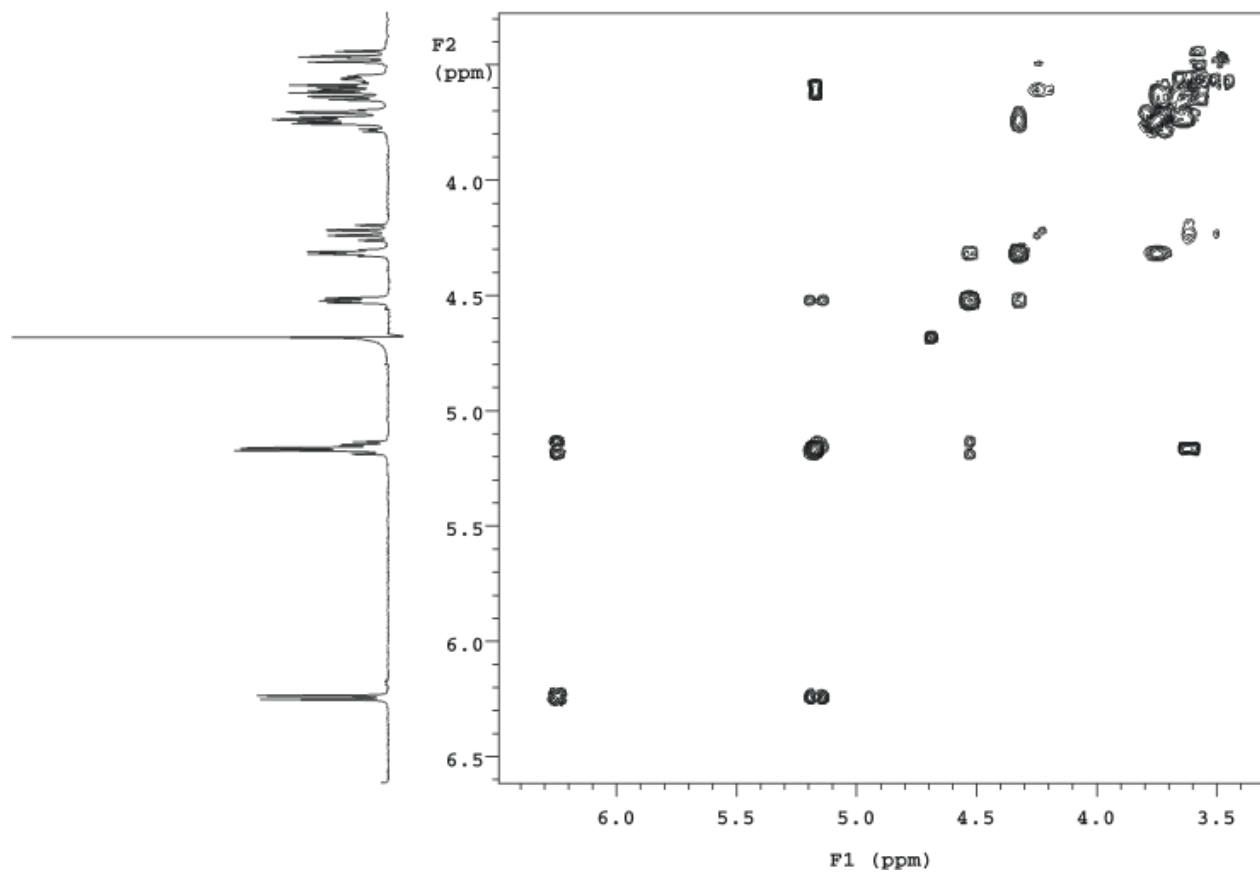

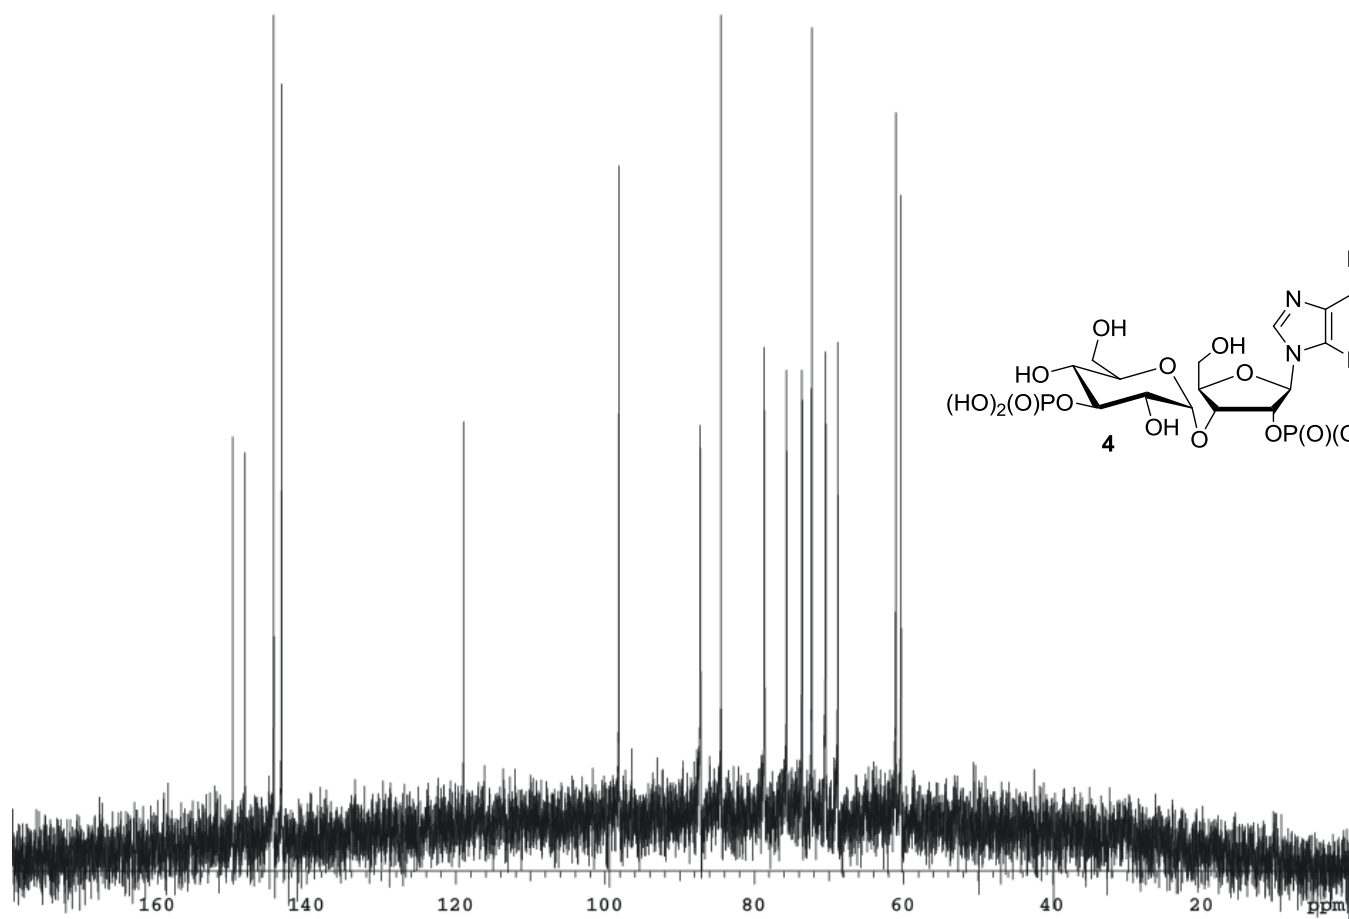

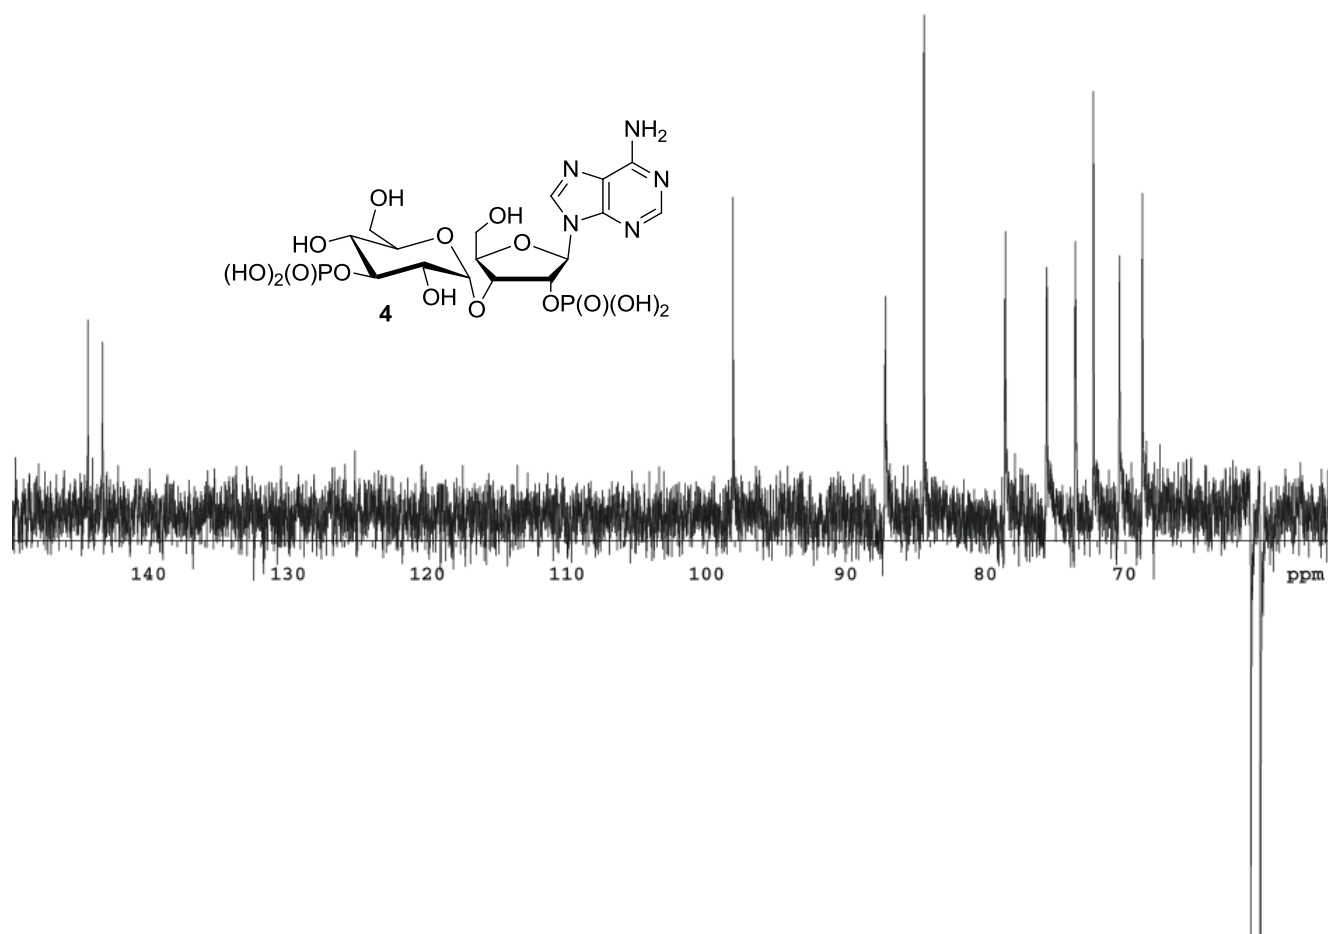

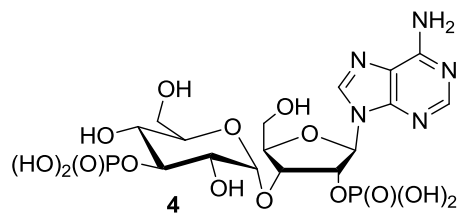

2005-11-17

Filename: gHMQC\_01

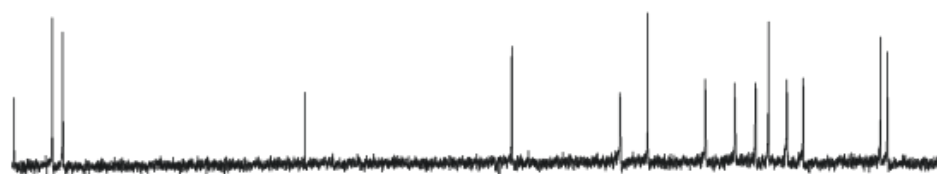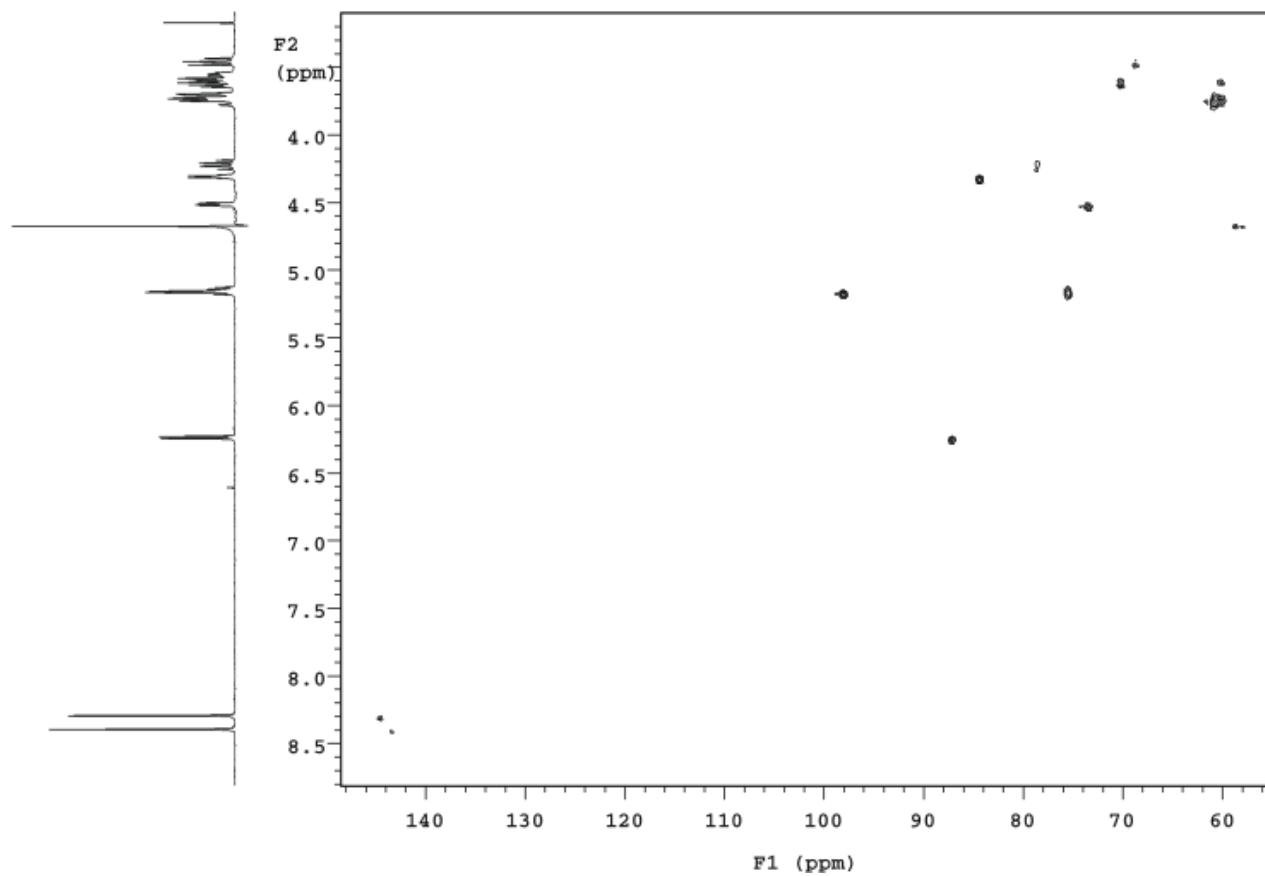

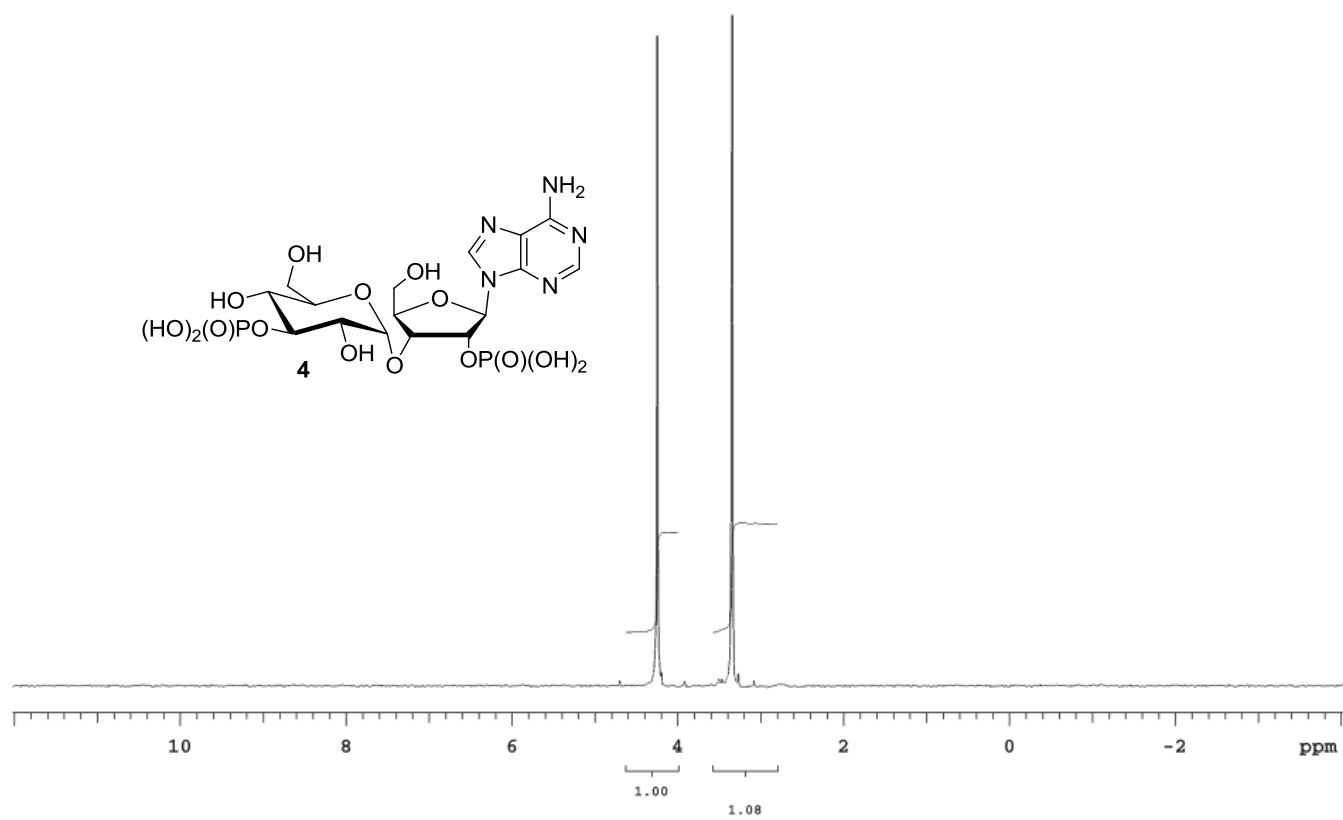

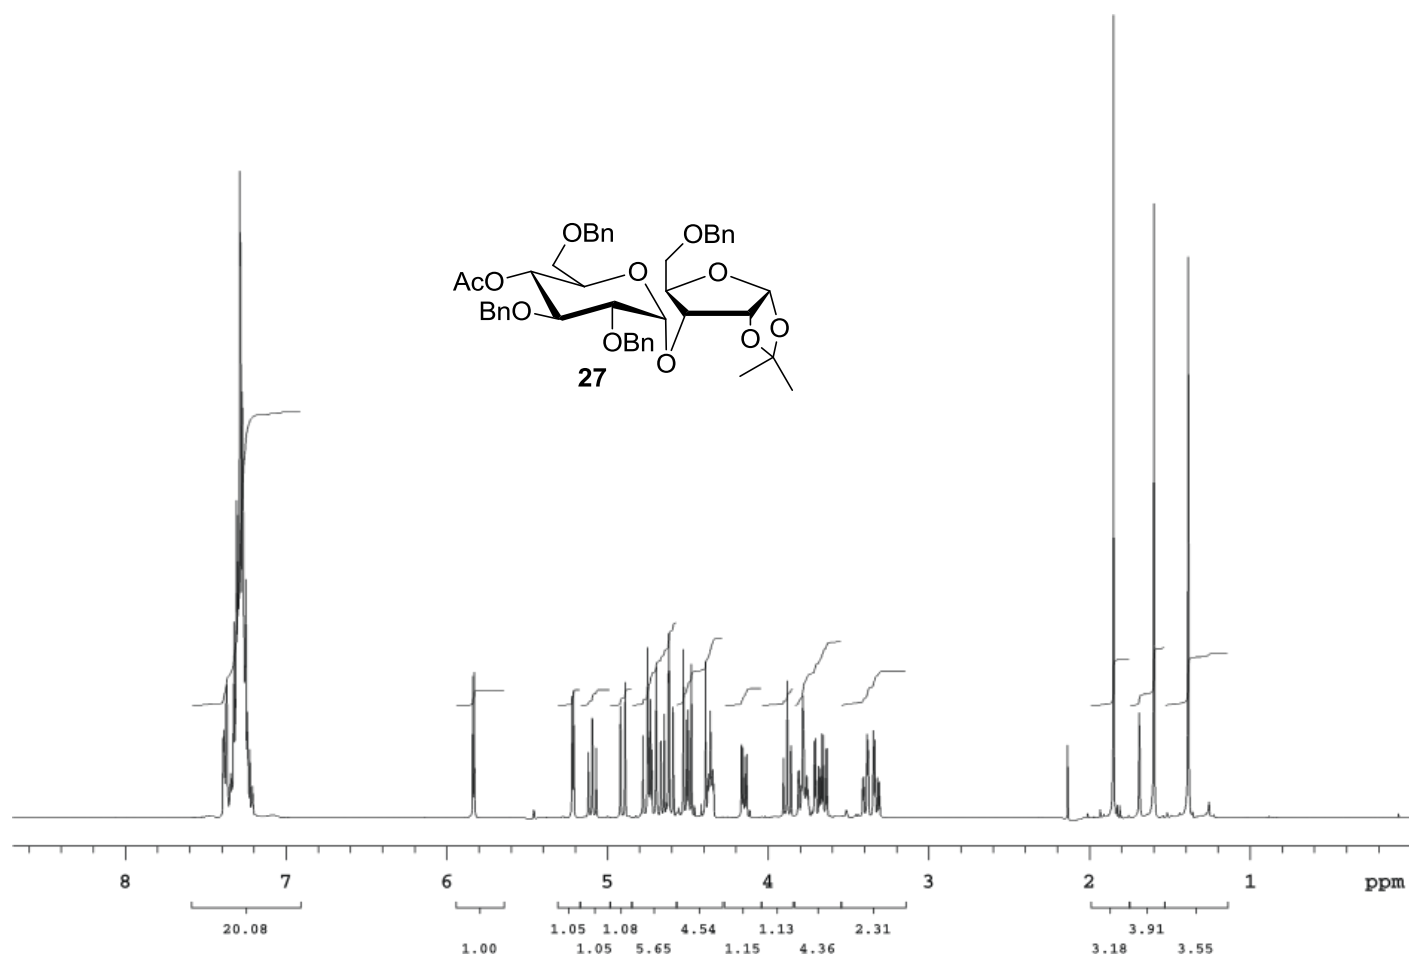



Sample: kms139a\_2005-10-04

Filename: gCOSY\_01

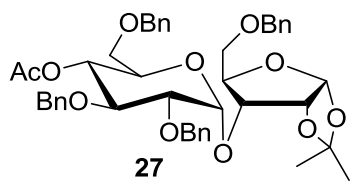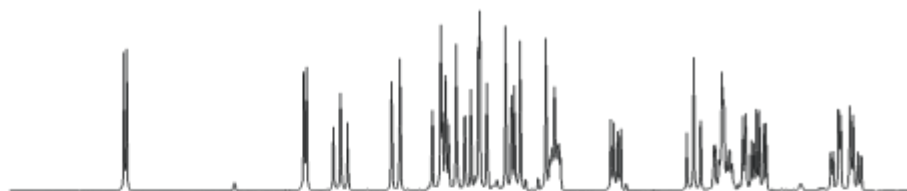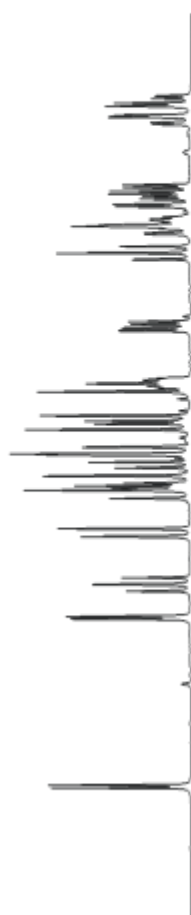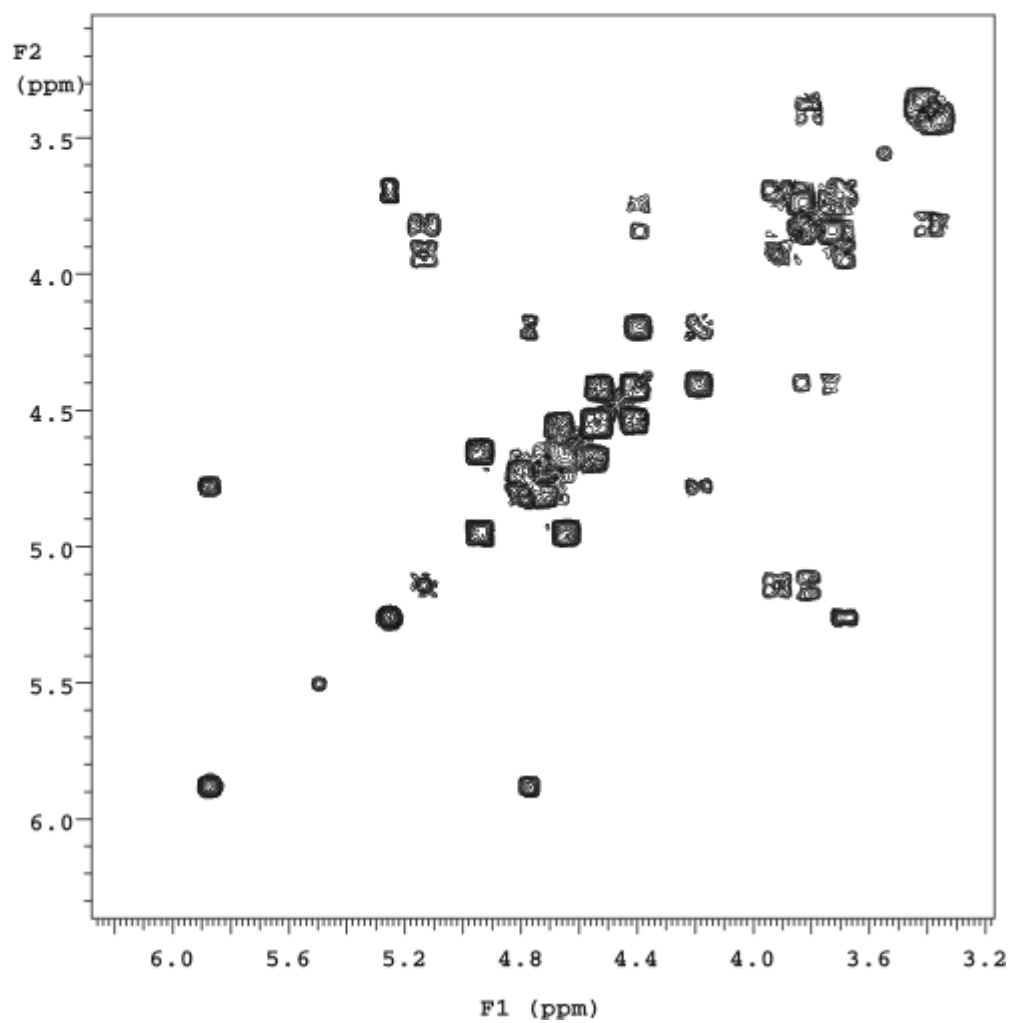

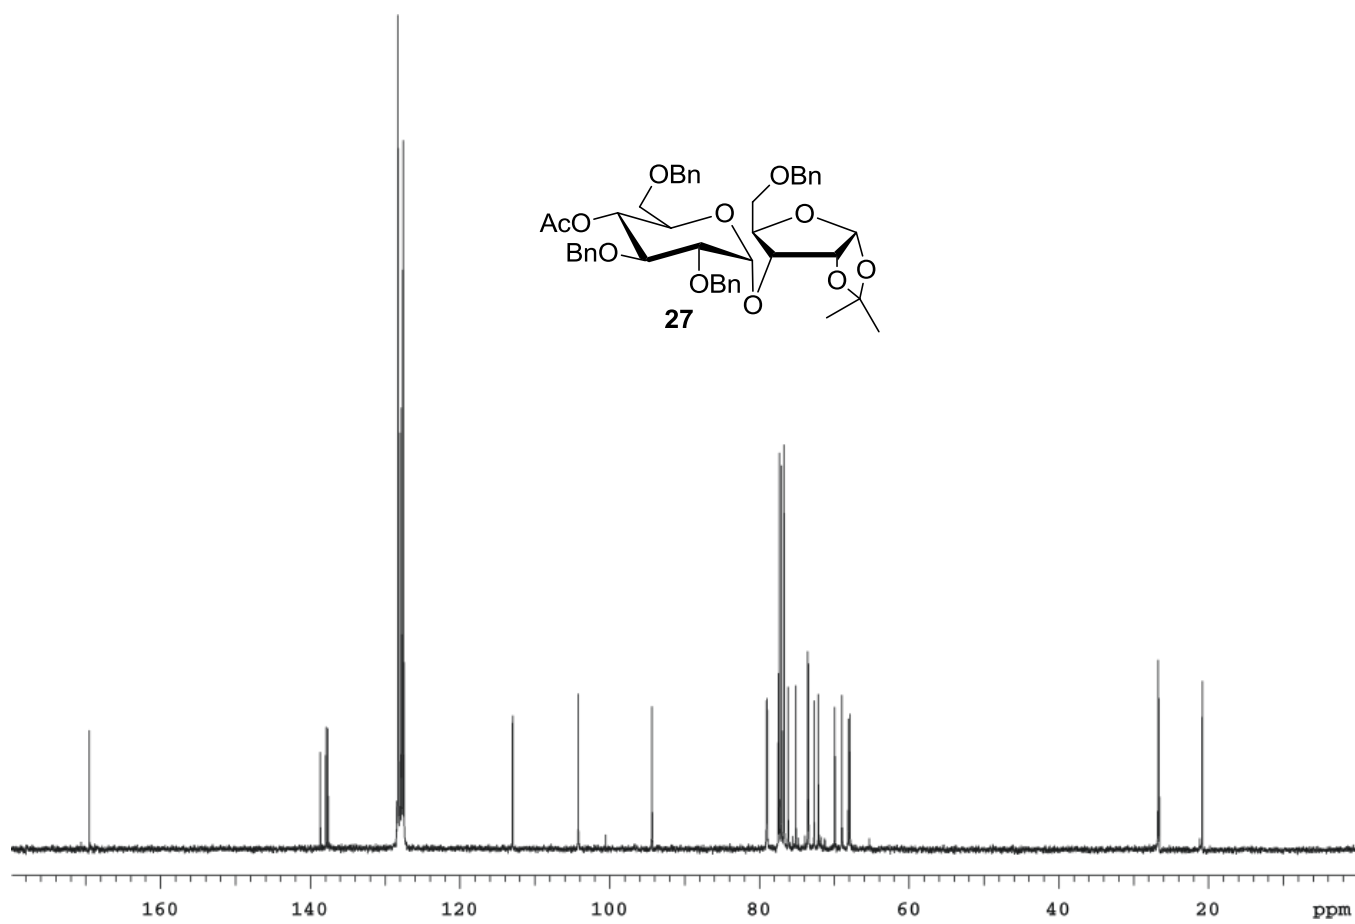

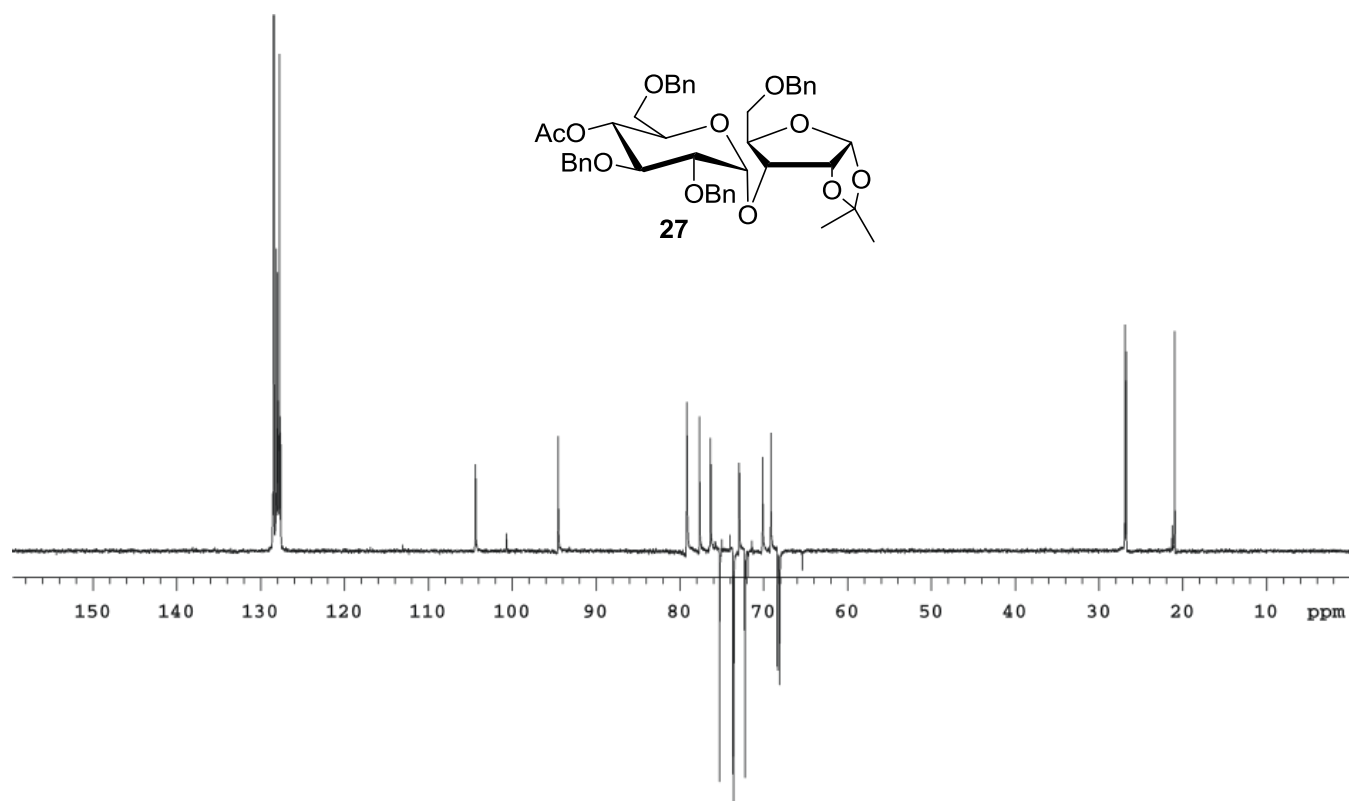

Sample: kms139b\_2005-10-04

Filename: gHMQC\_01

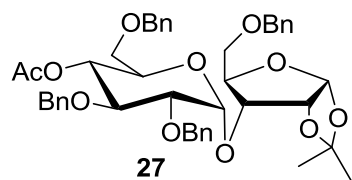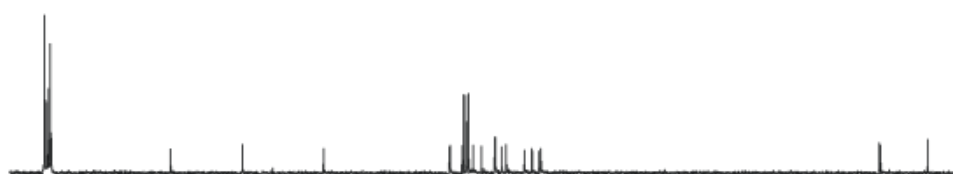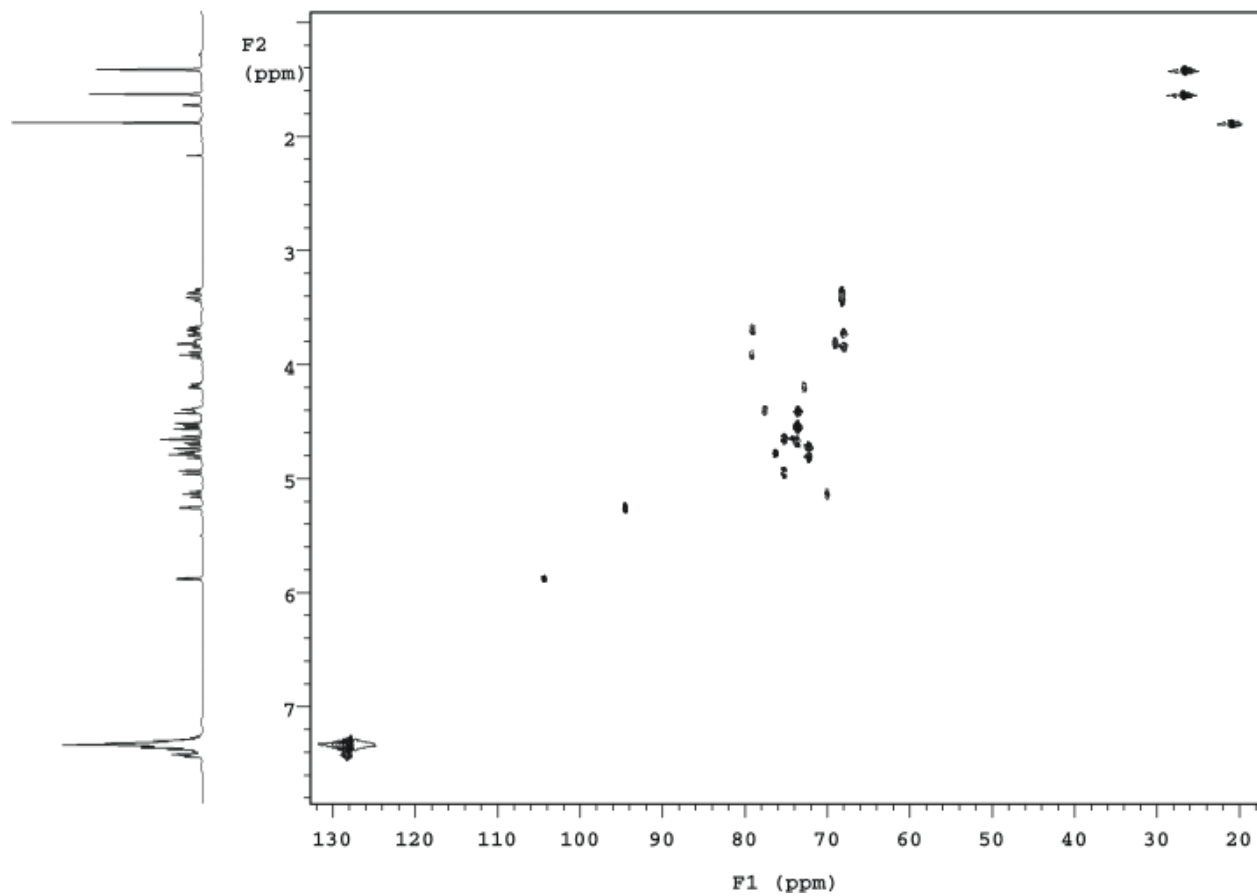

Sample: kms139b\_2005-10-04

Filename: gHMQC\_01

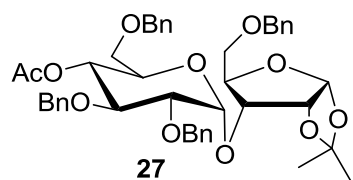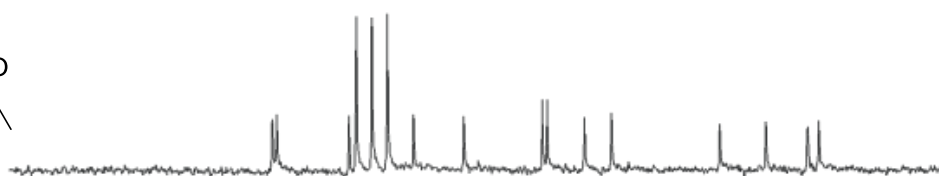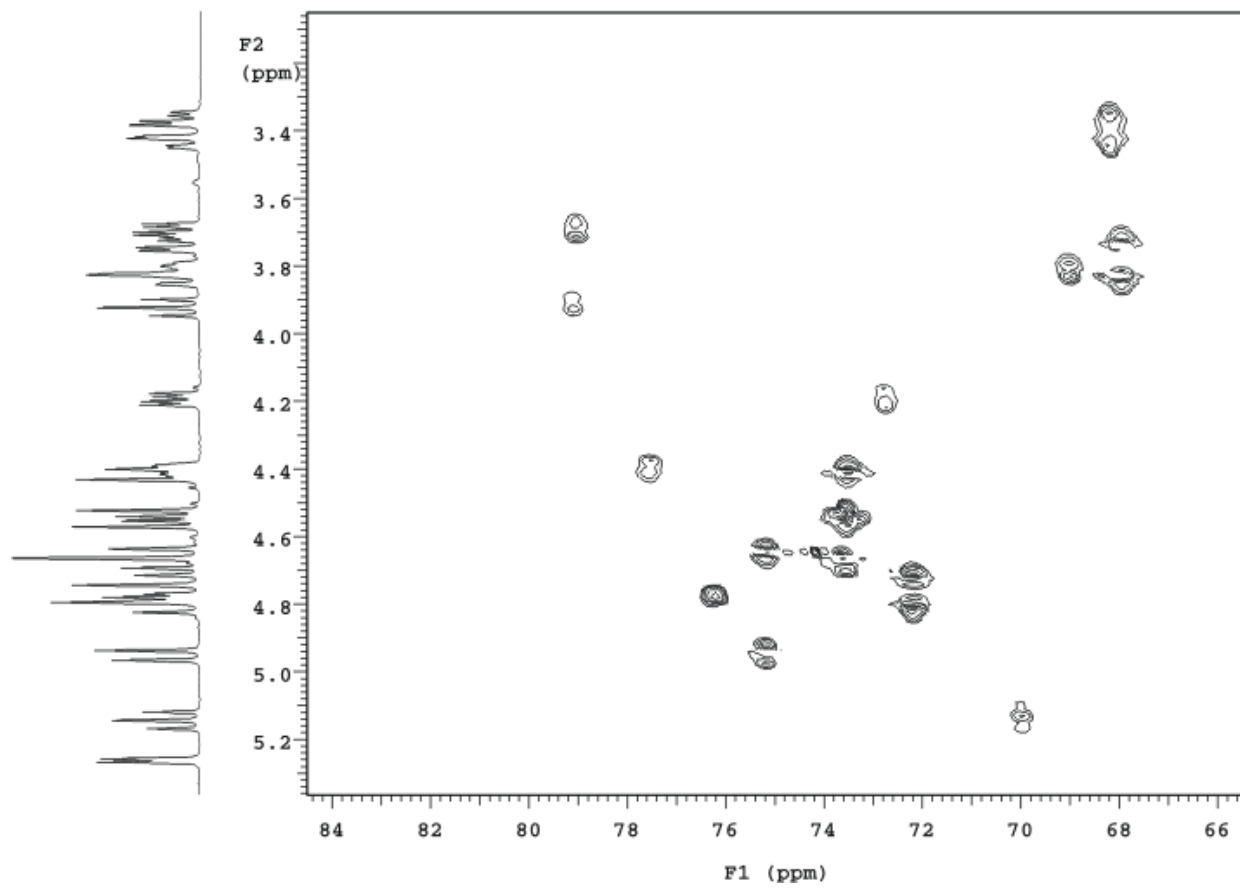

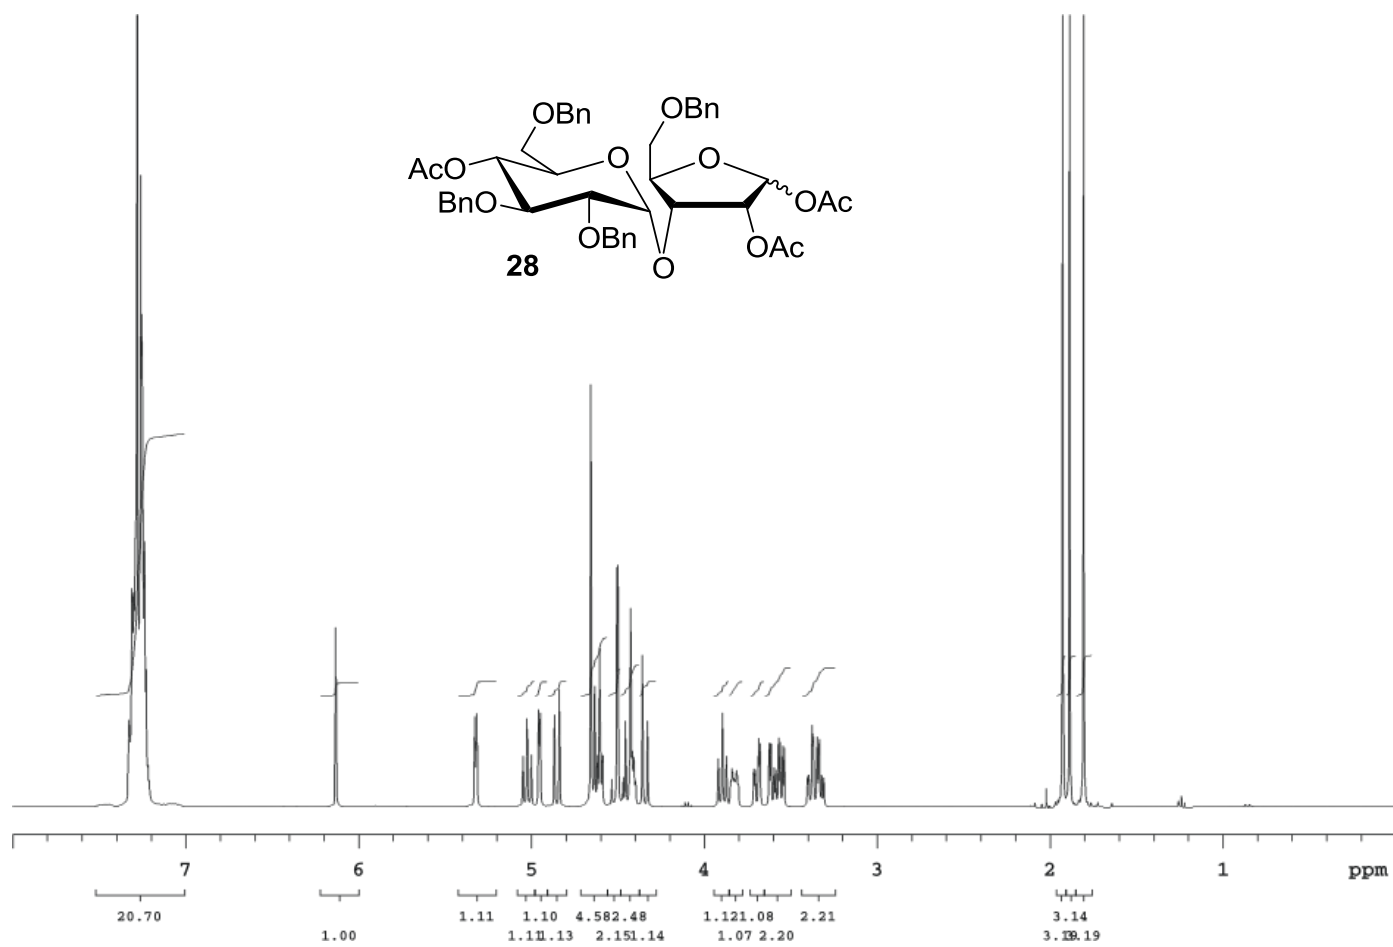

Sample: kms141\_2005-10-06

Filename: gCOSY\_01

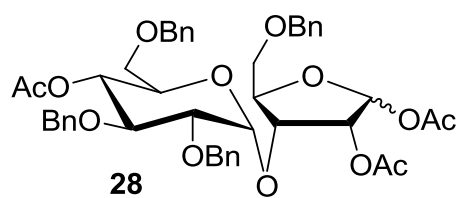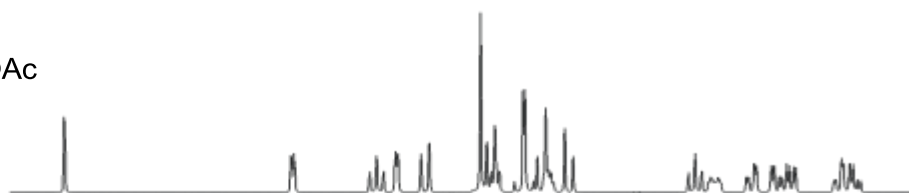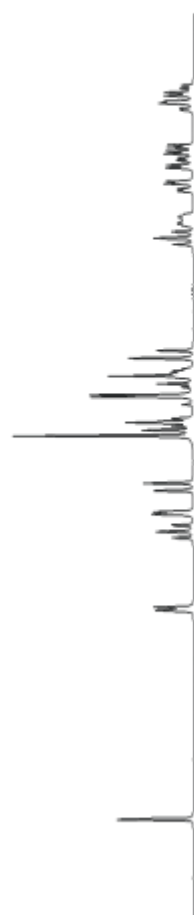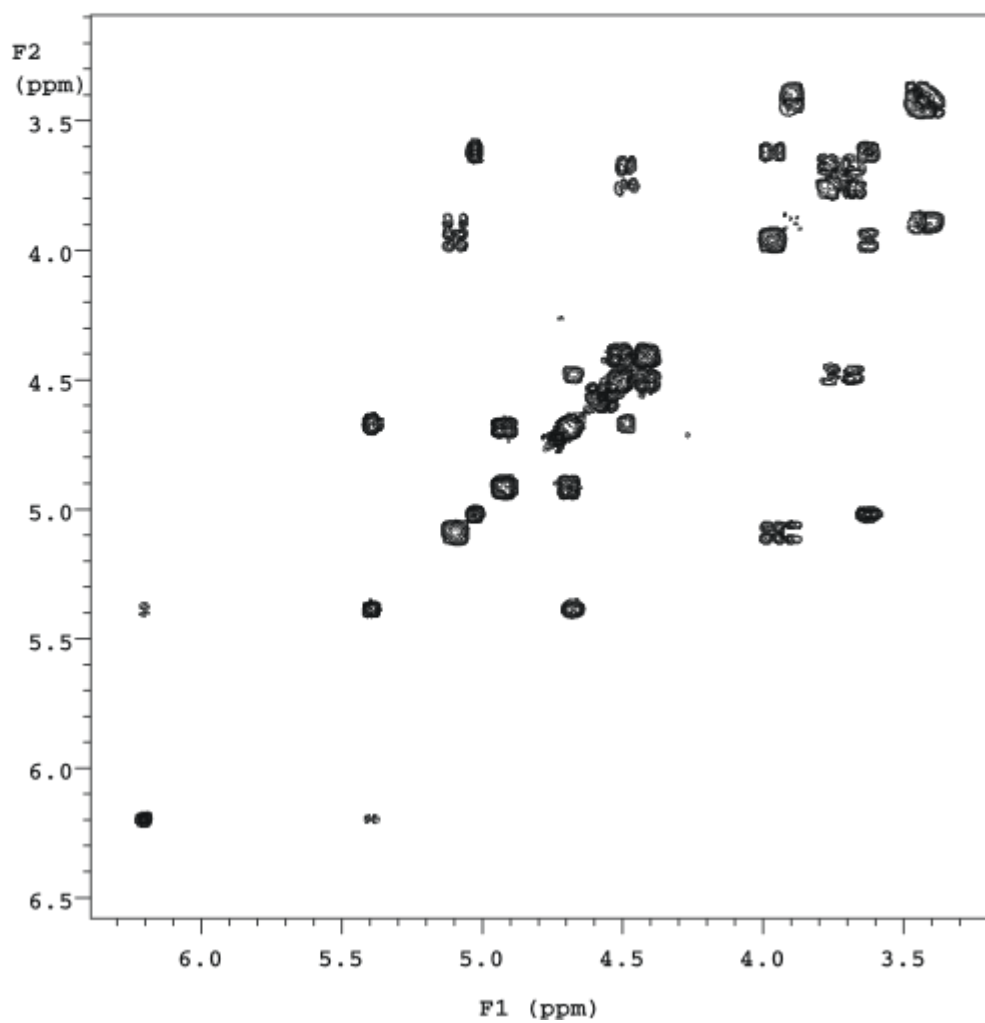

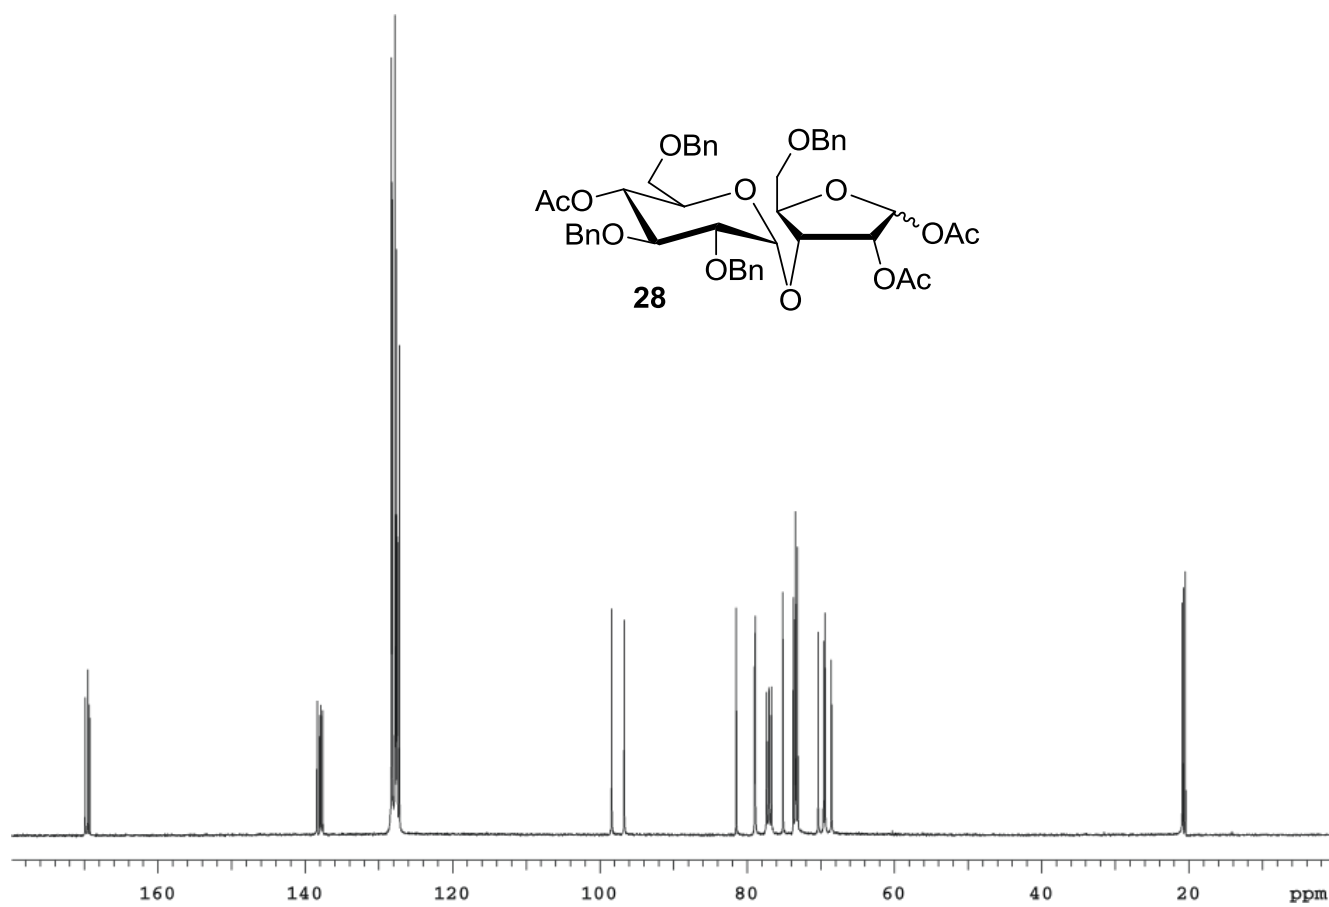



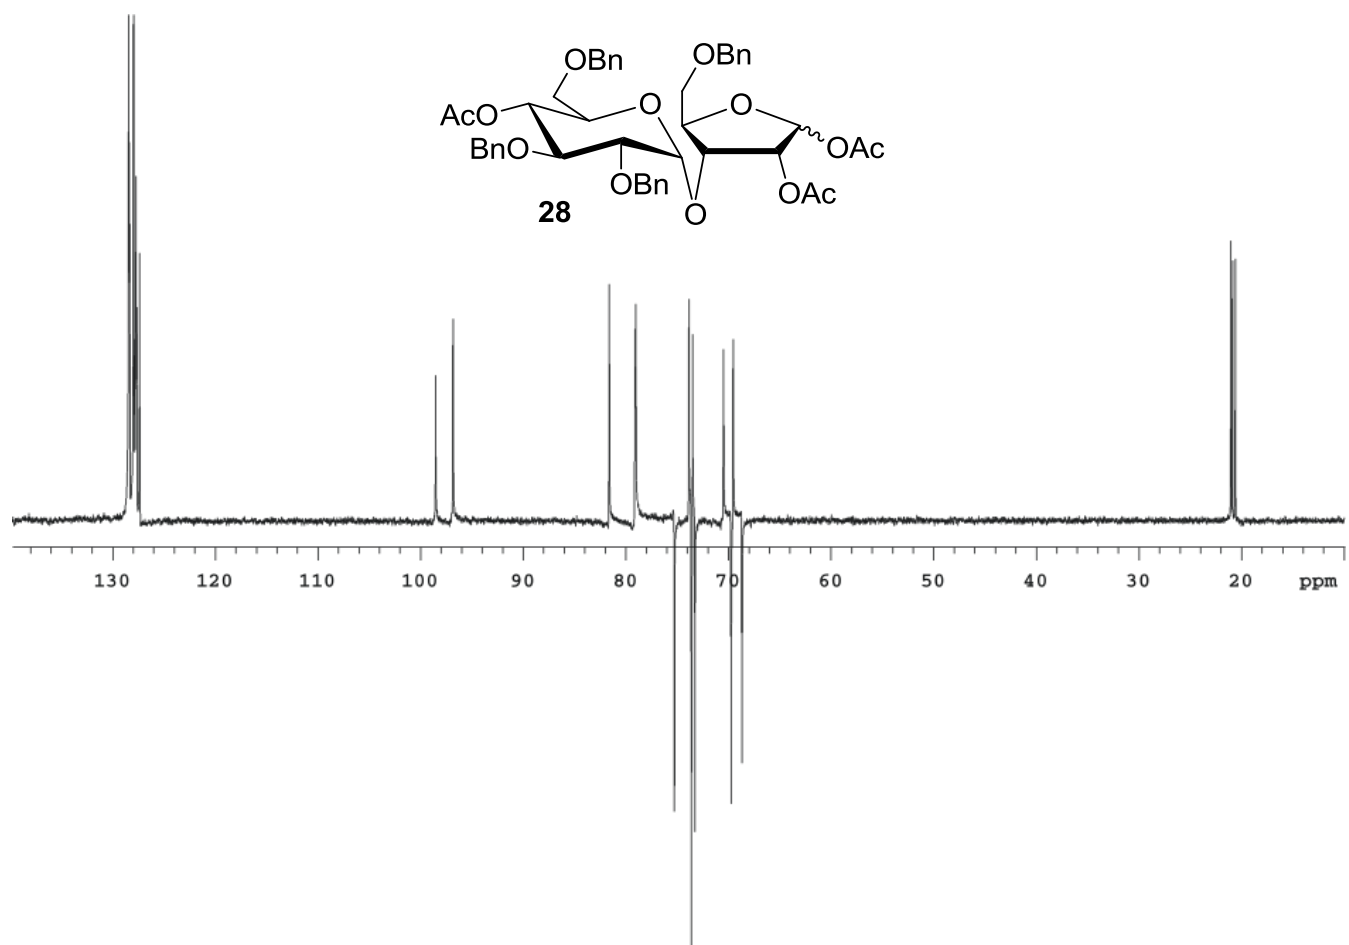

Sample: kms141 2005-10-06

Filename: gHMQC\_01

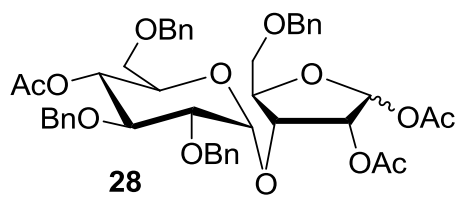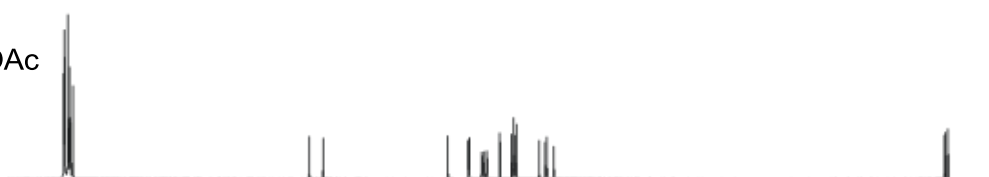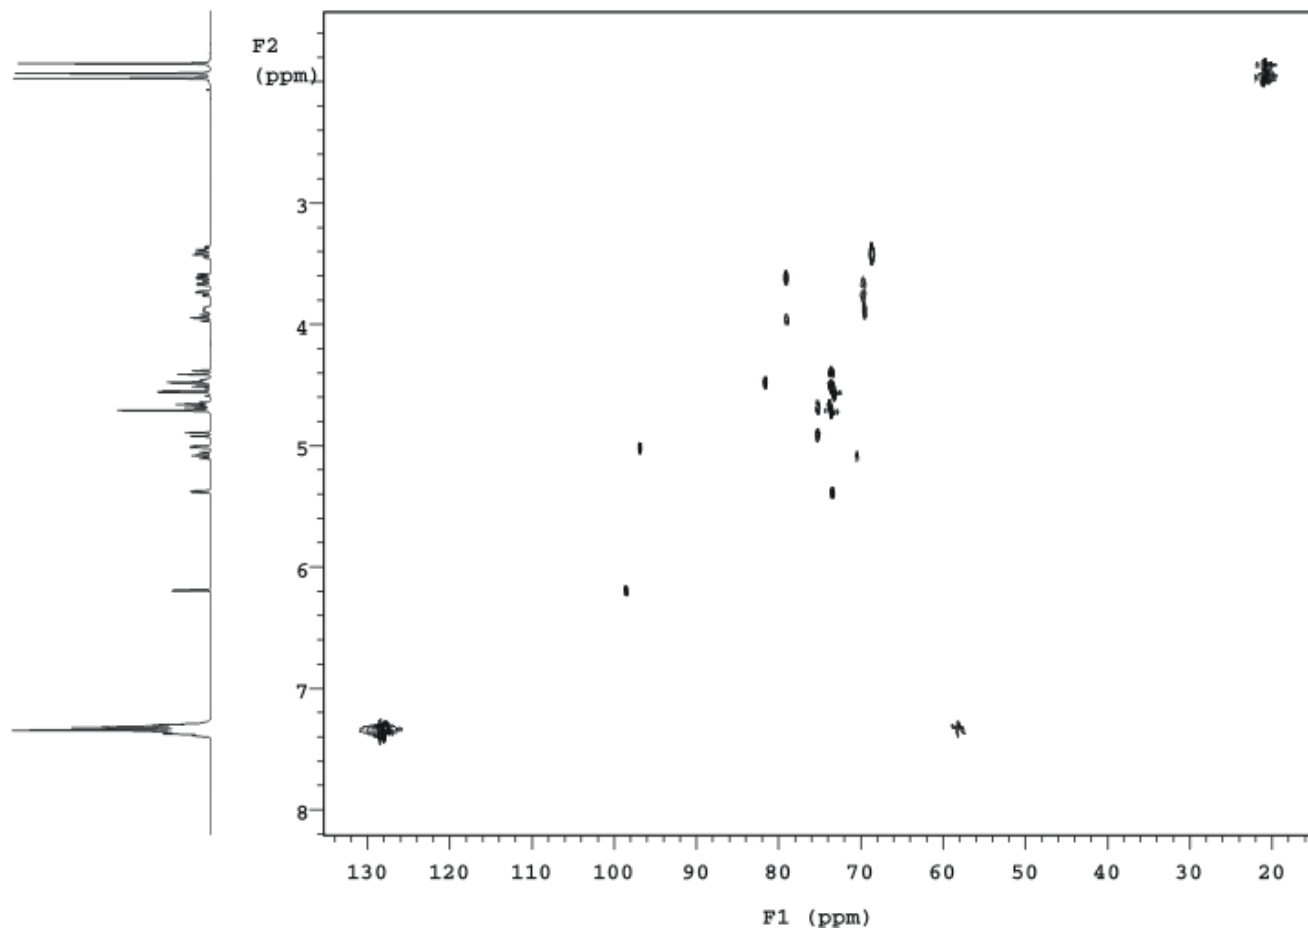

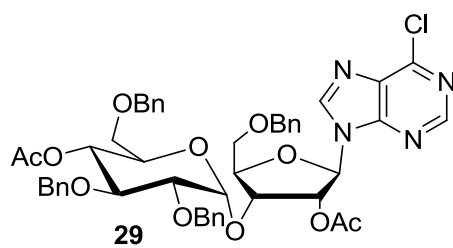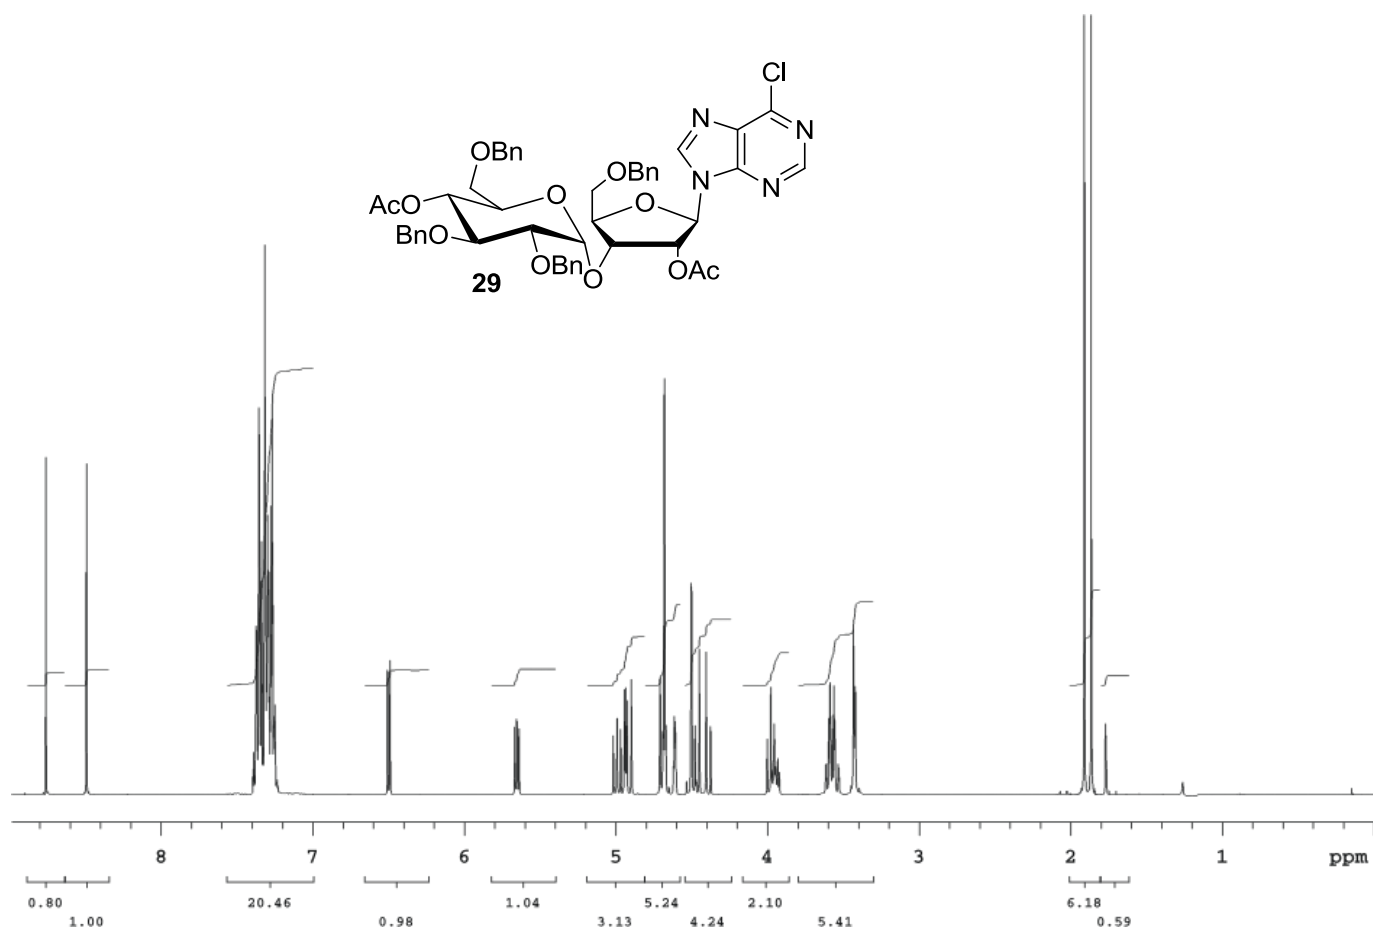

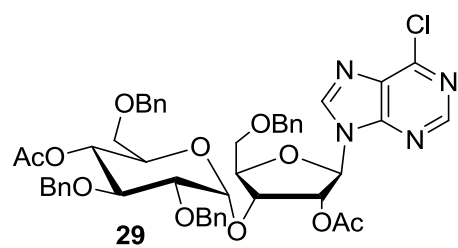

Filename: gCOSY\_01

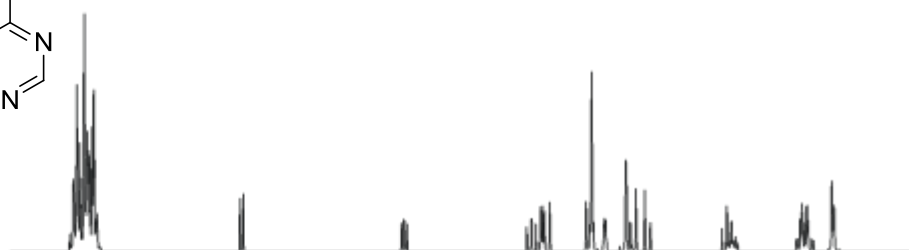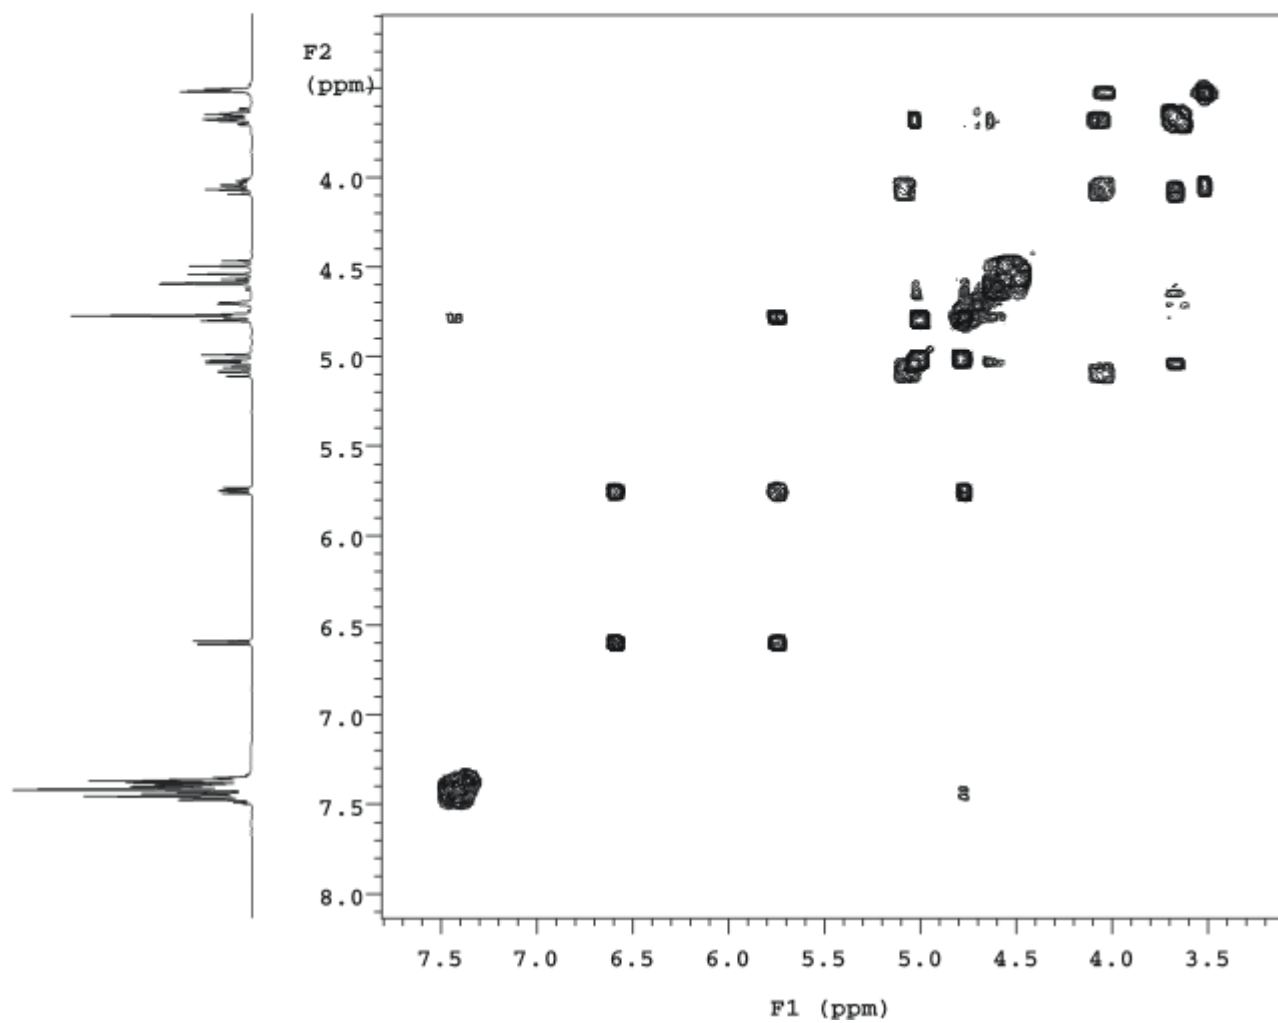

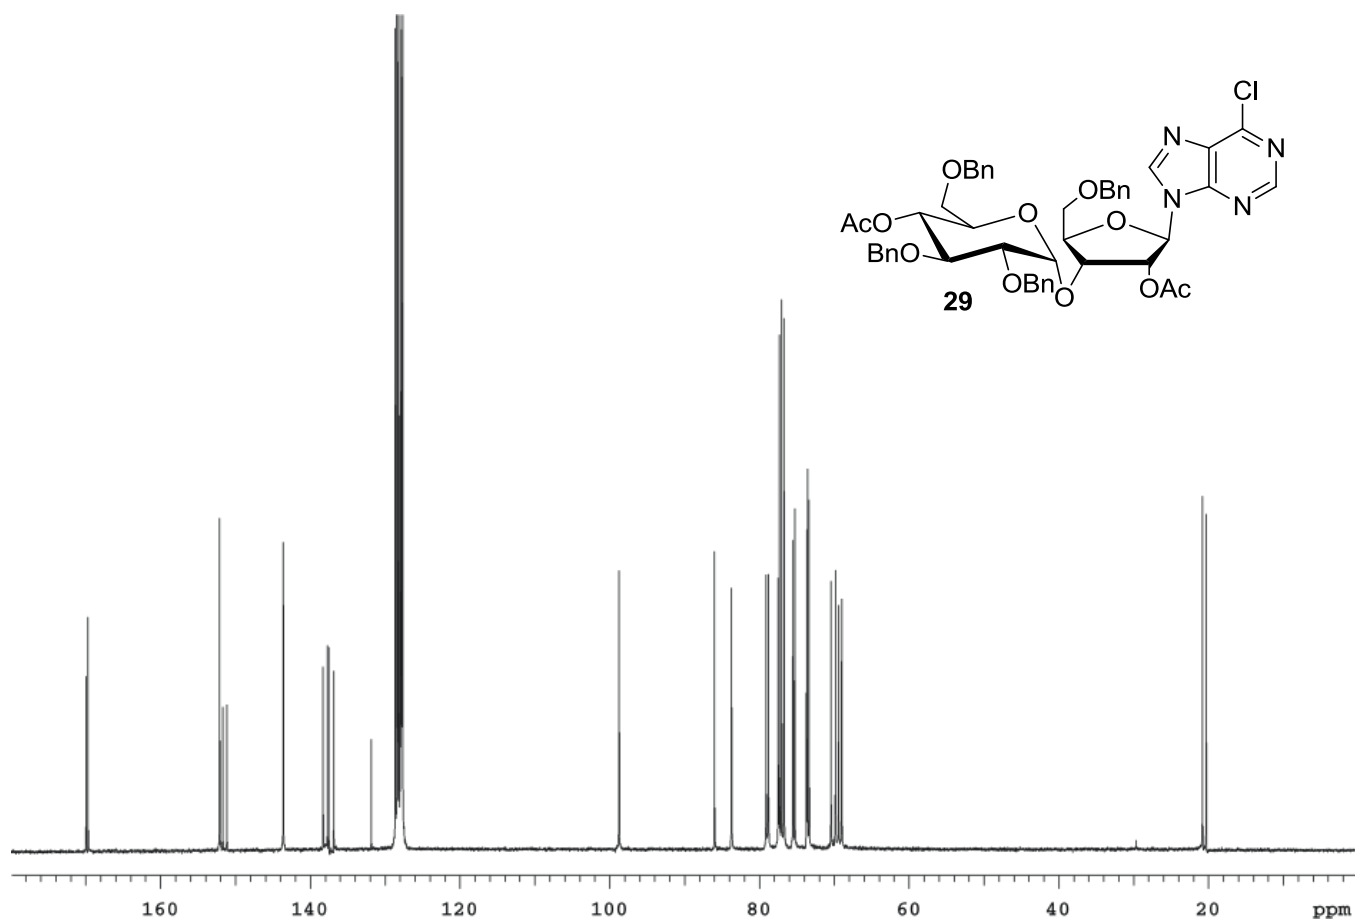

S62

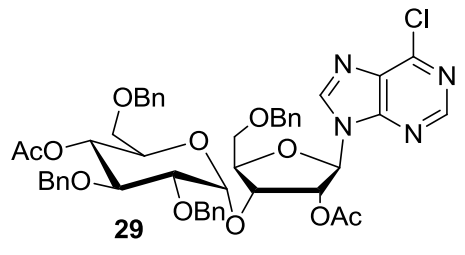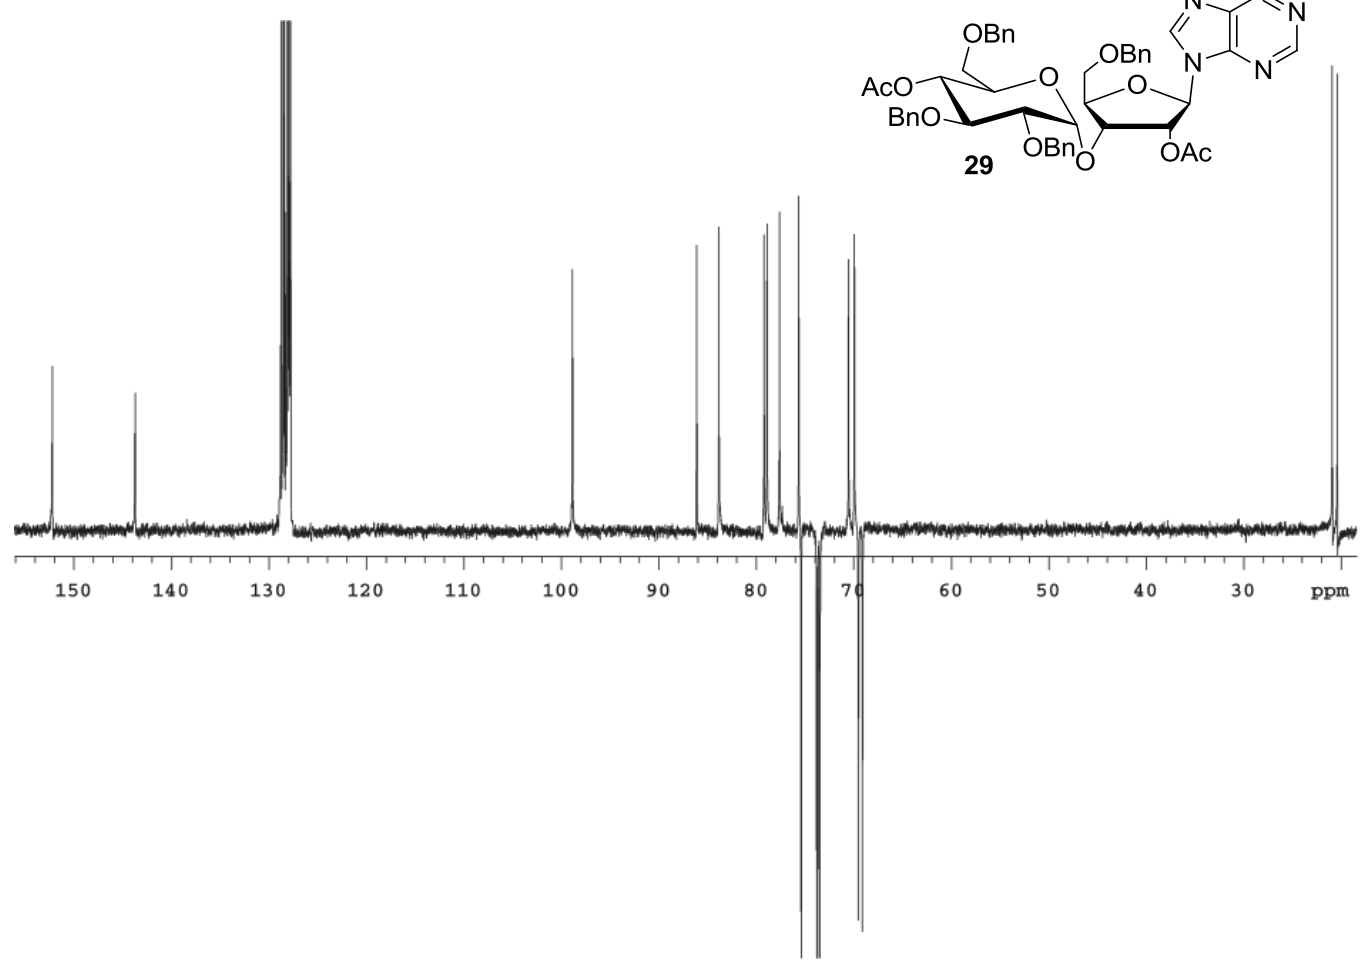

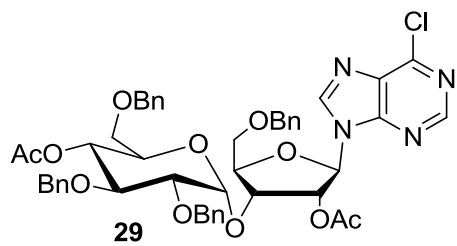

Filename: gHMQC\_01

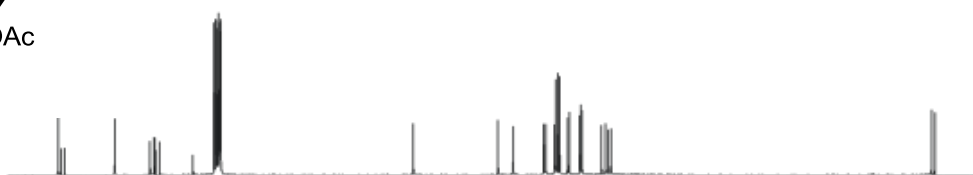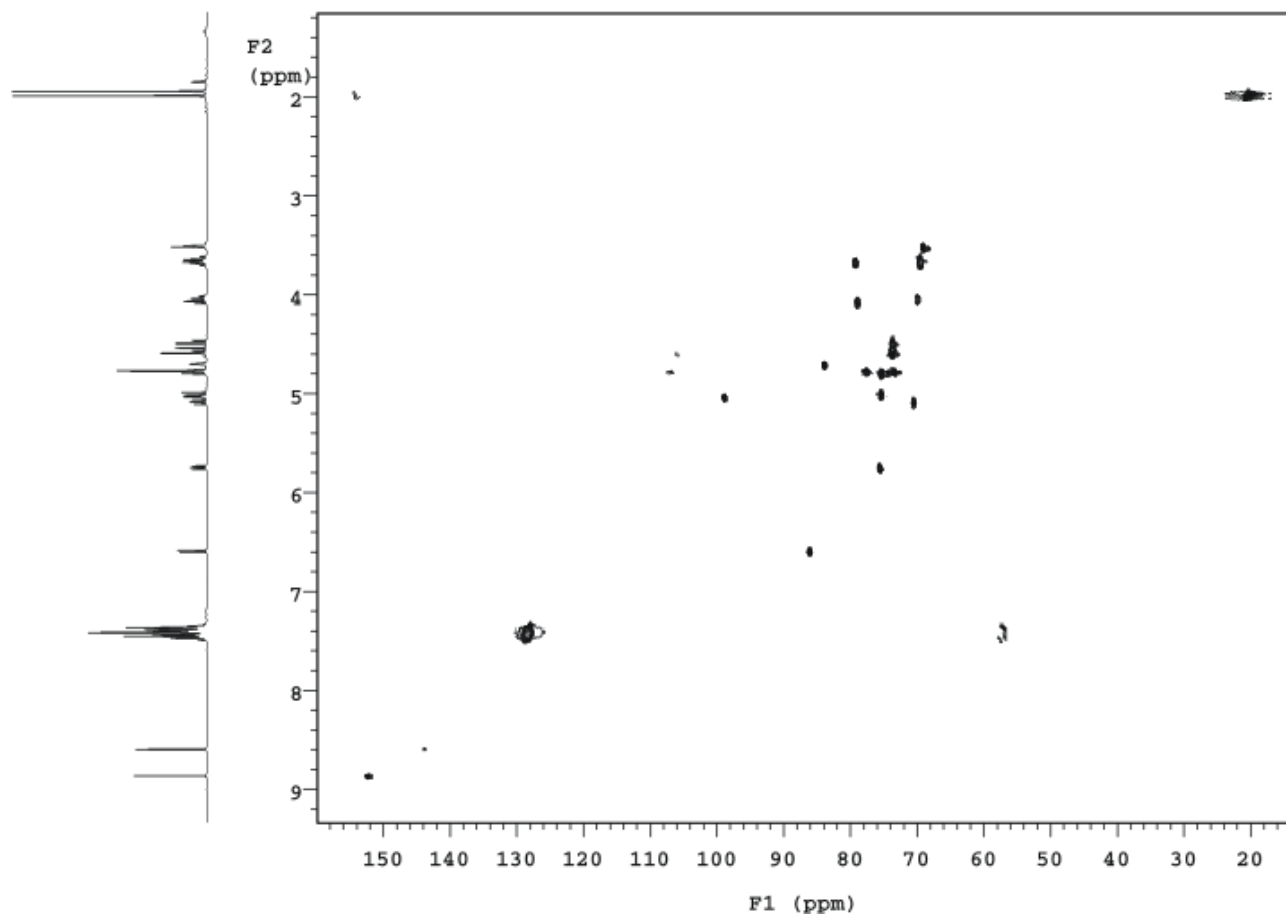

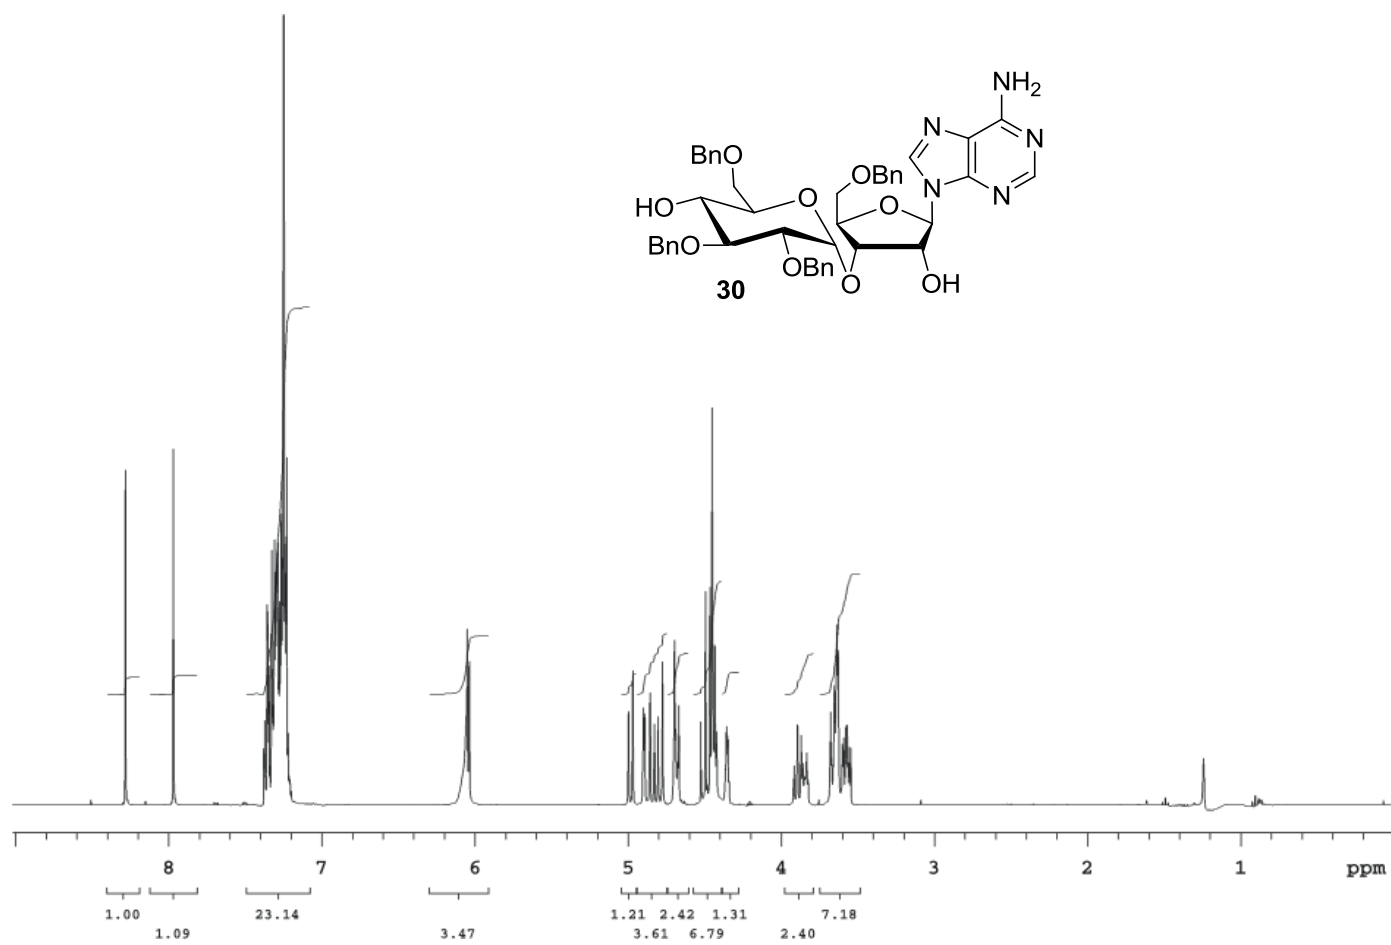



Sample: kms147\_2005-11-01

Filename: gCOSY\_01

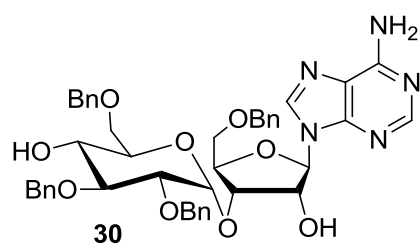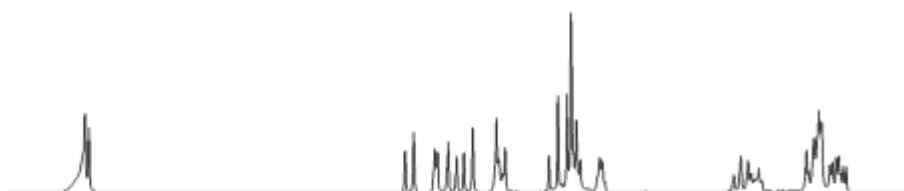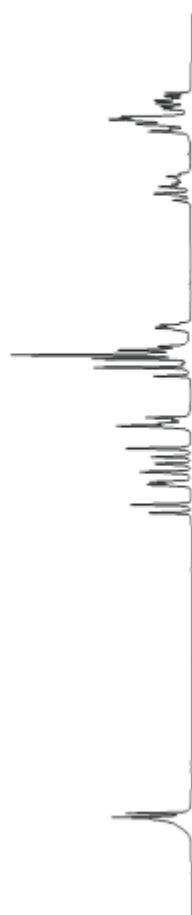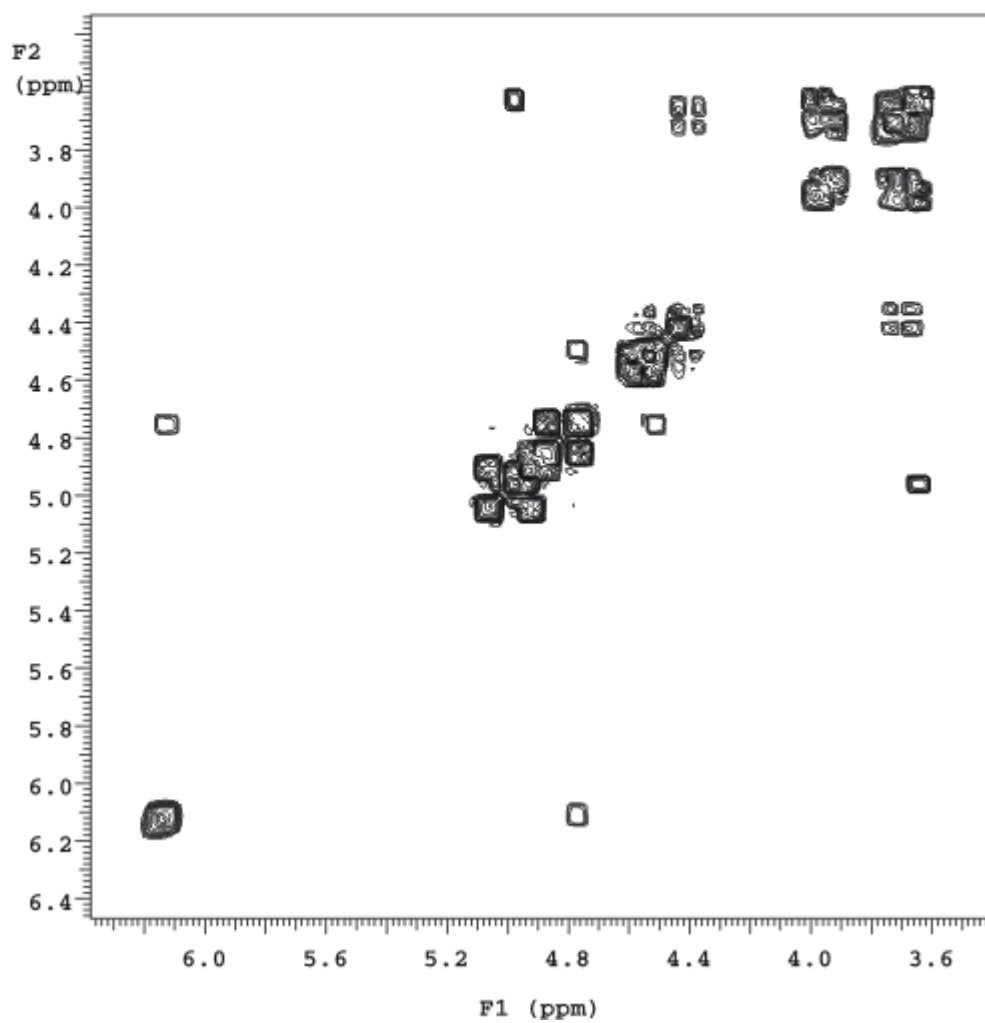

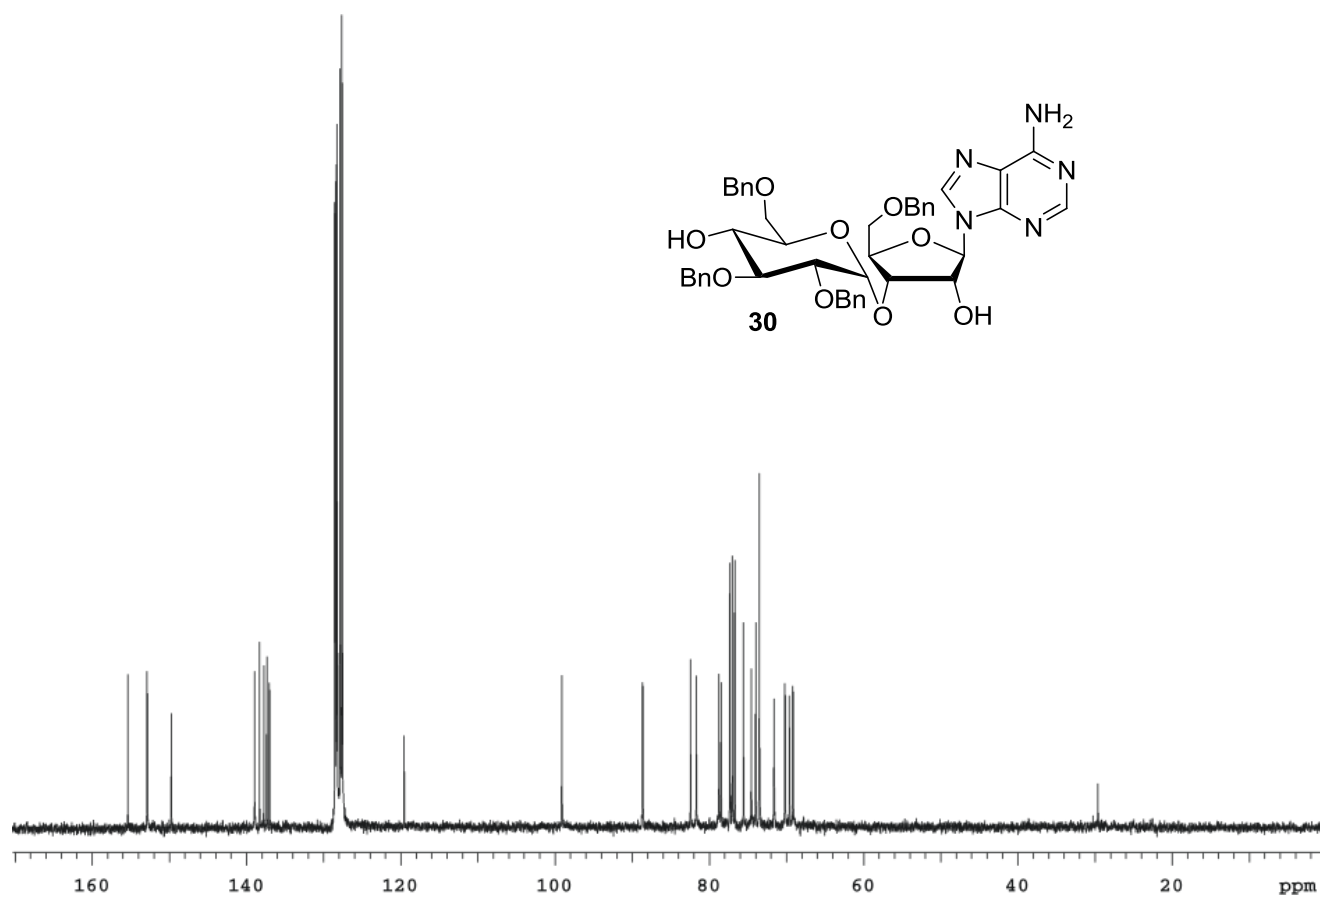

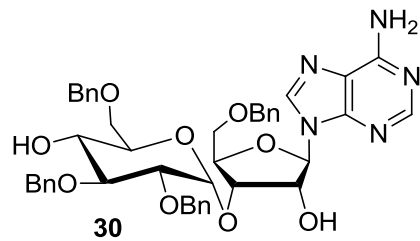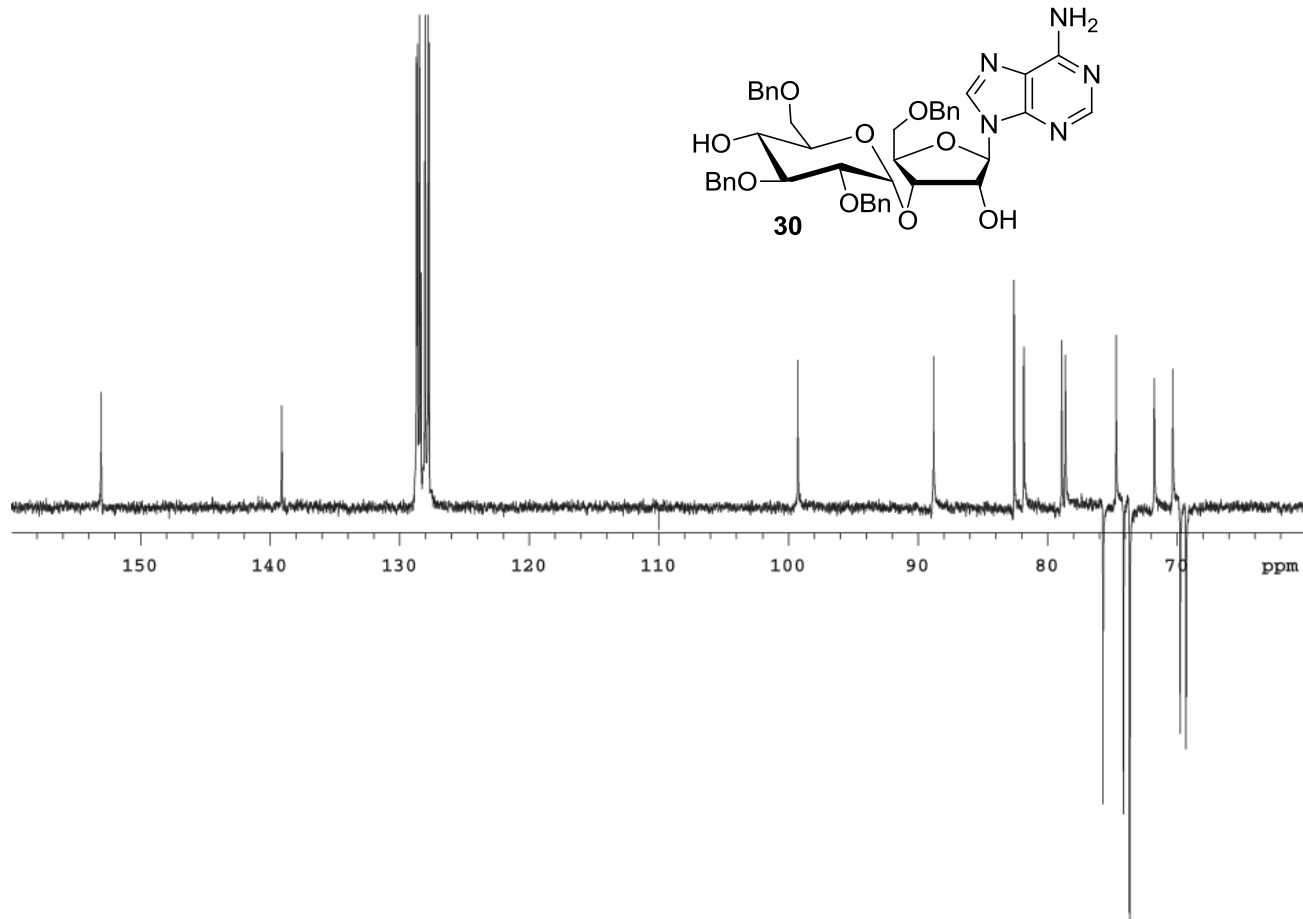

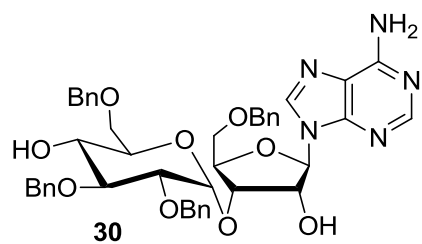

Filename: gHMQC\_01

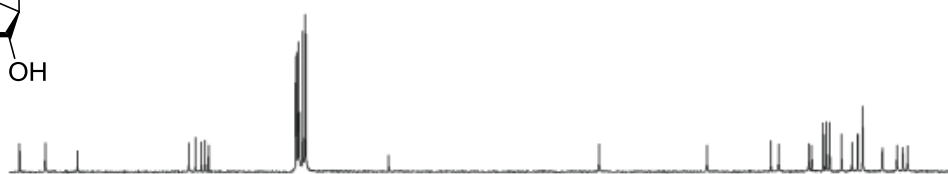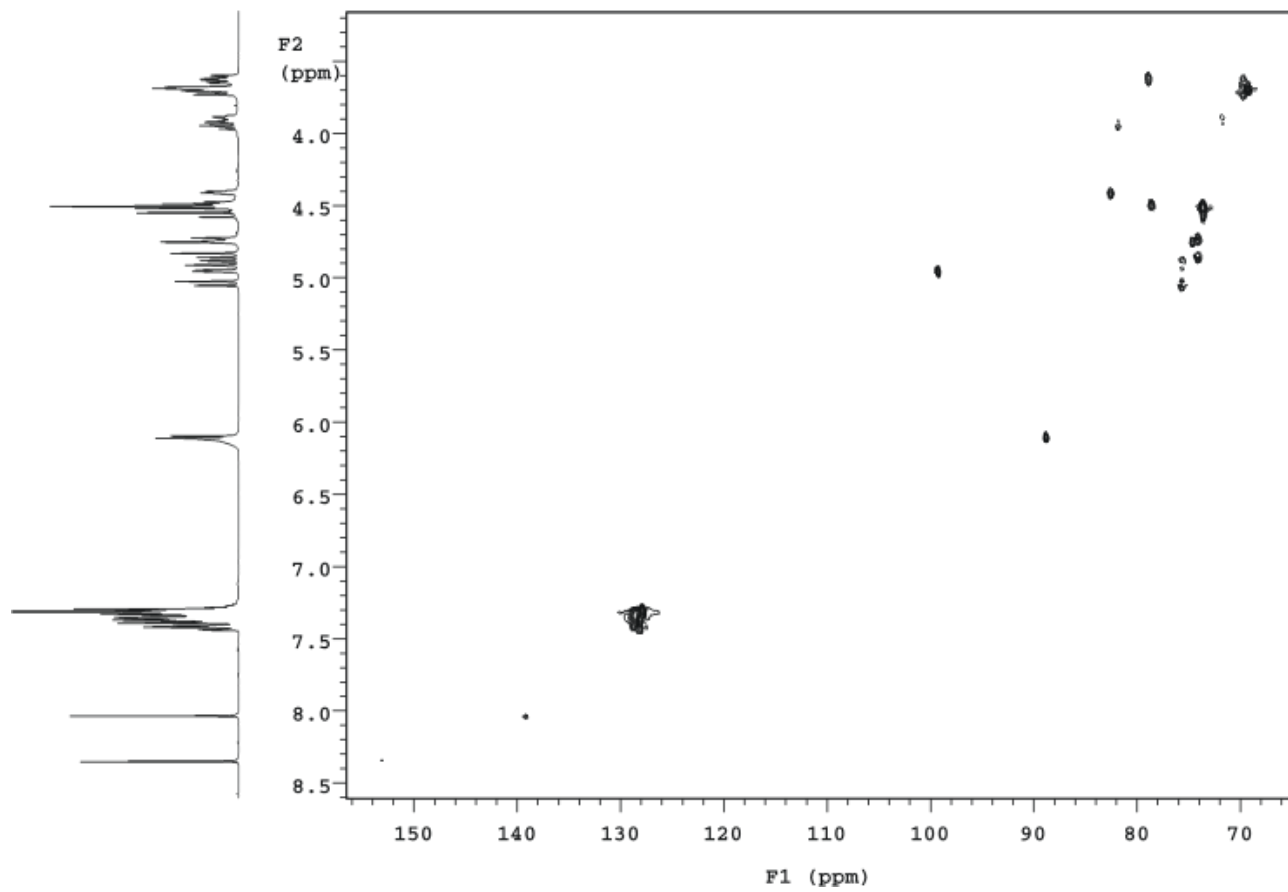

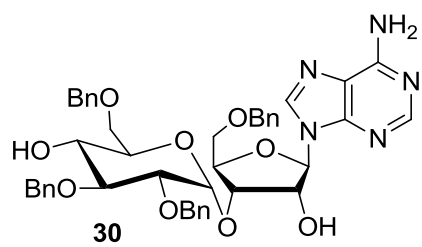

Filename: gHMBC\_01

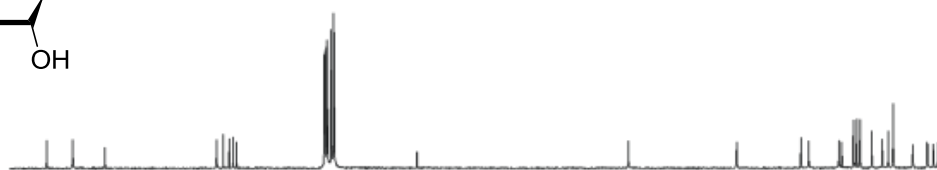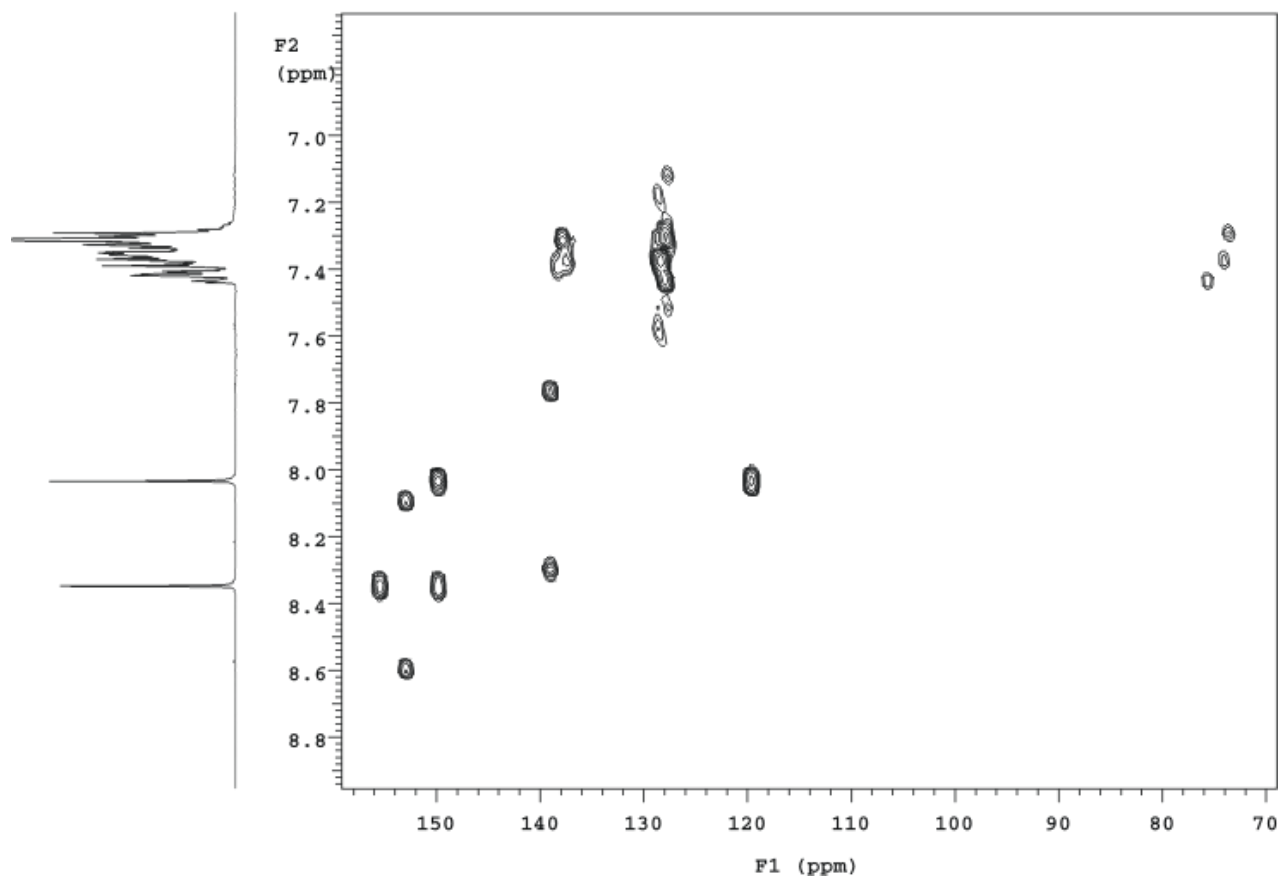

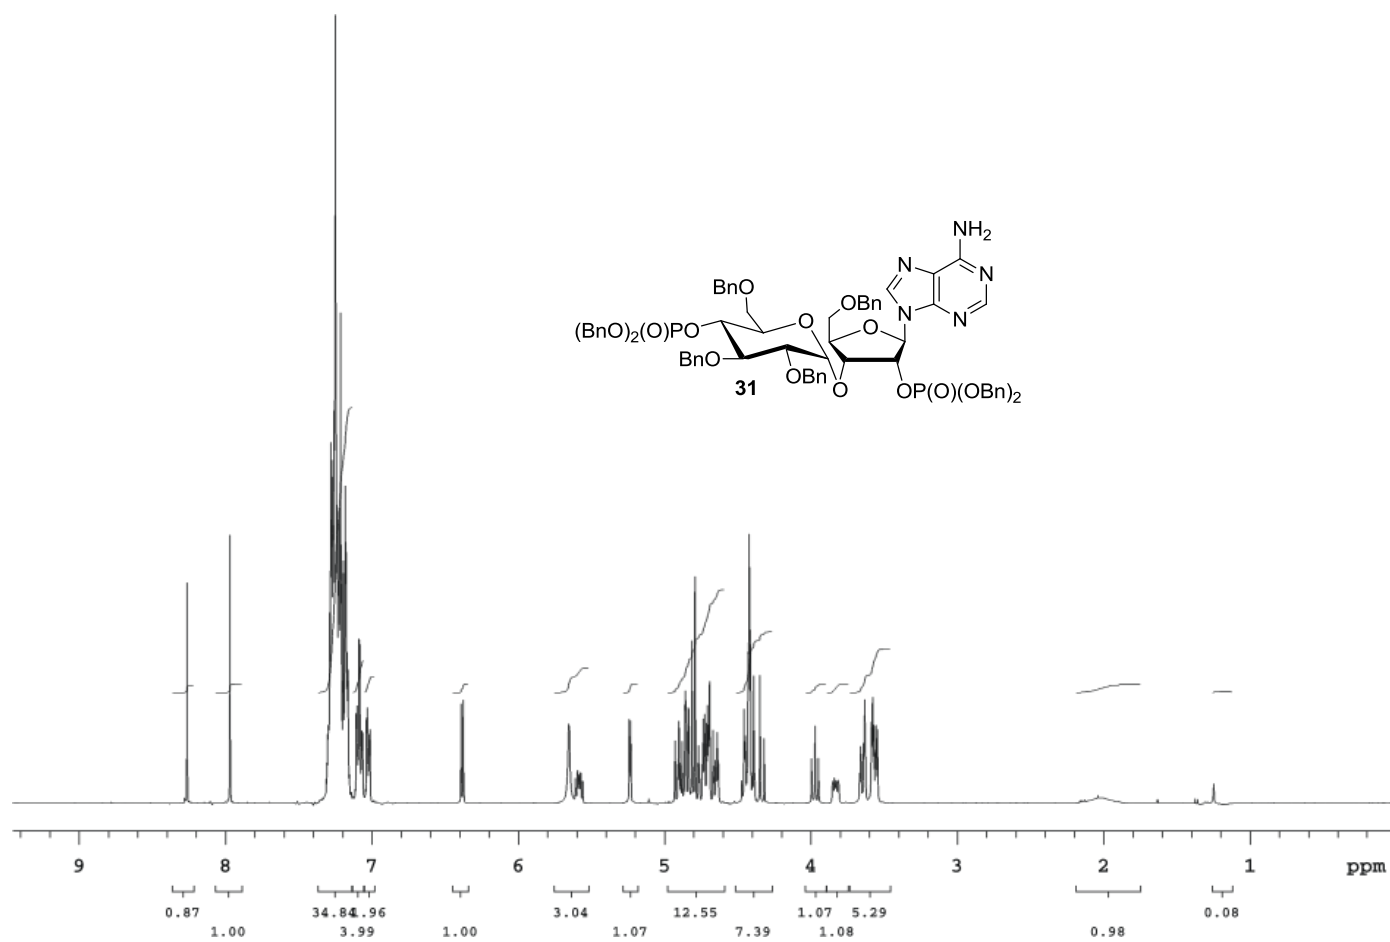

Sample: kms207b\_2006-06-12

Filename: gCOSY\_01

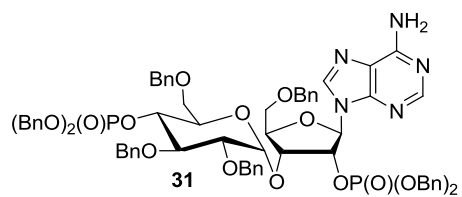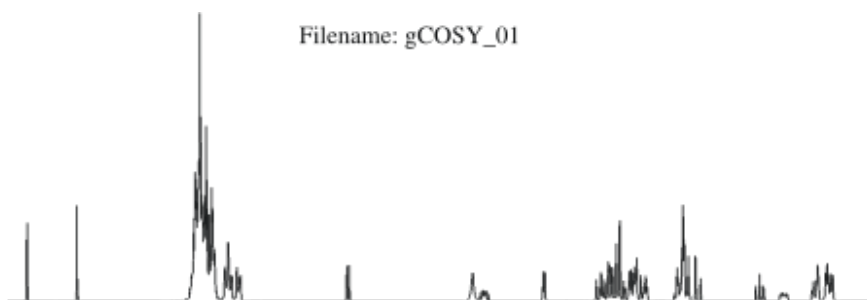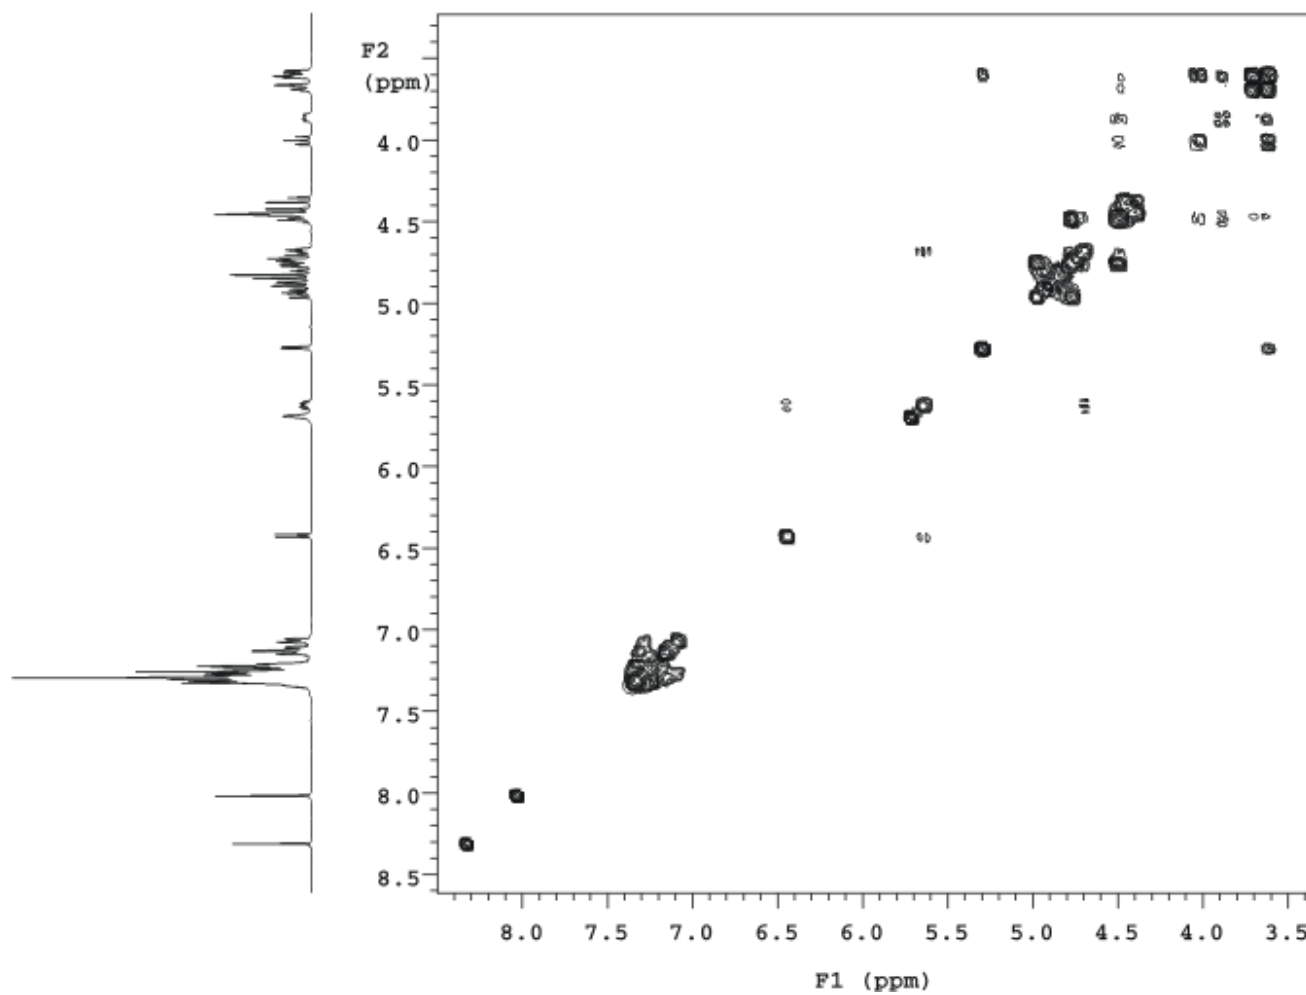

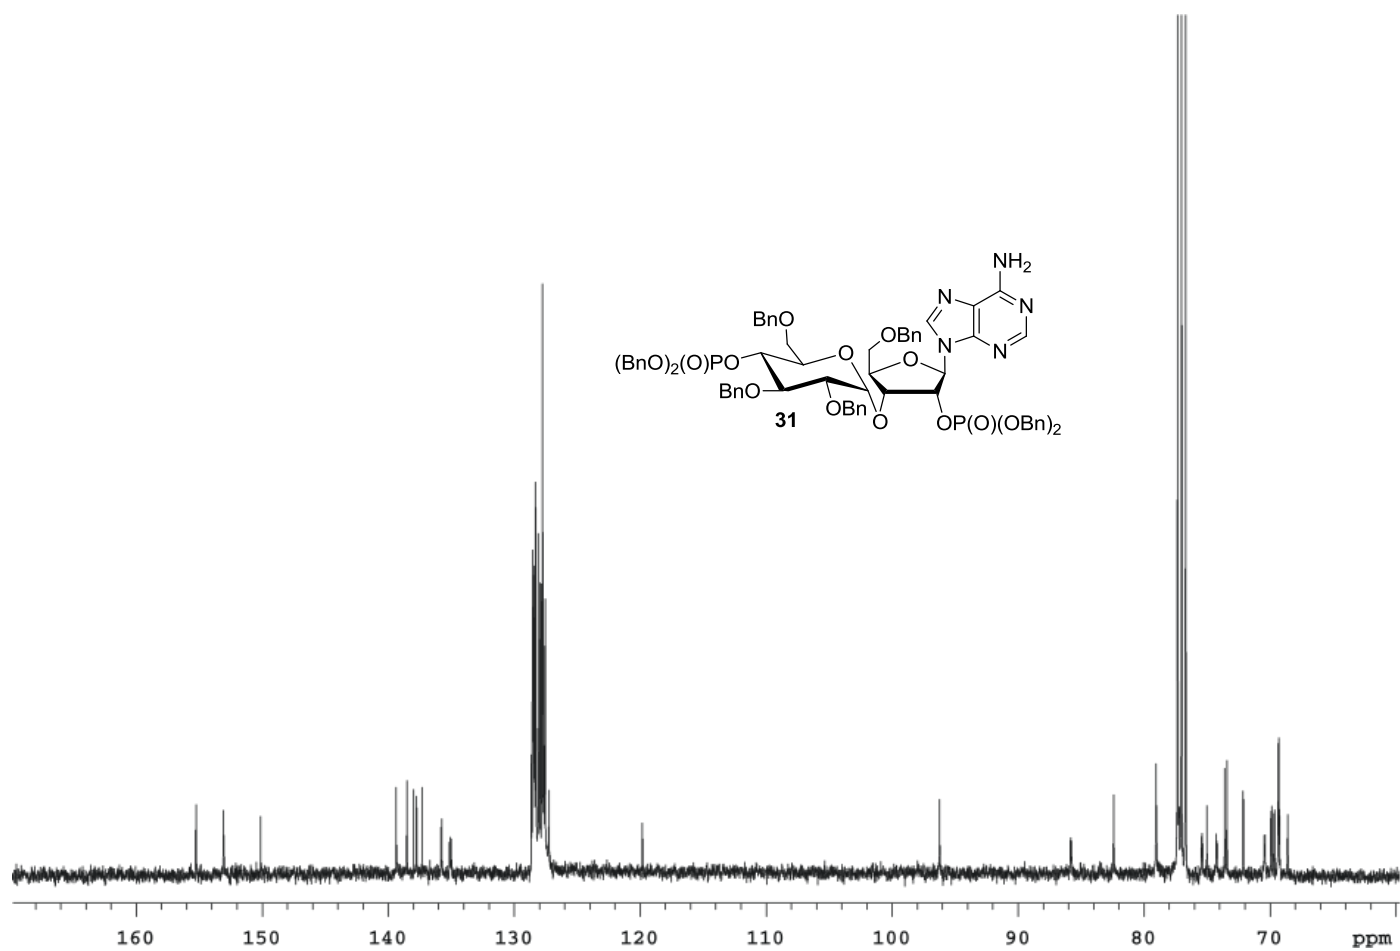



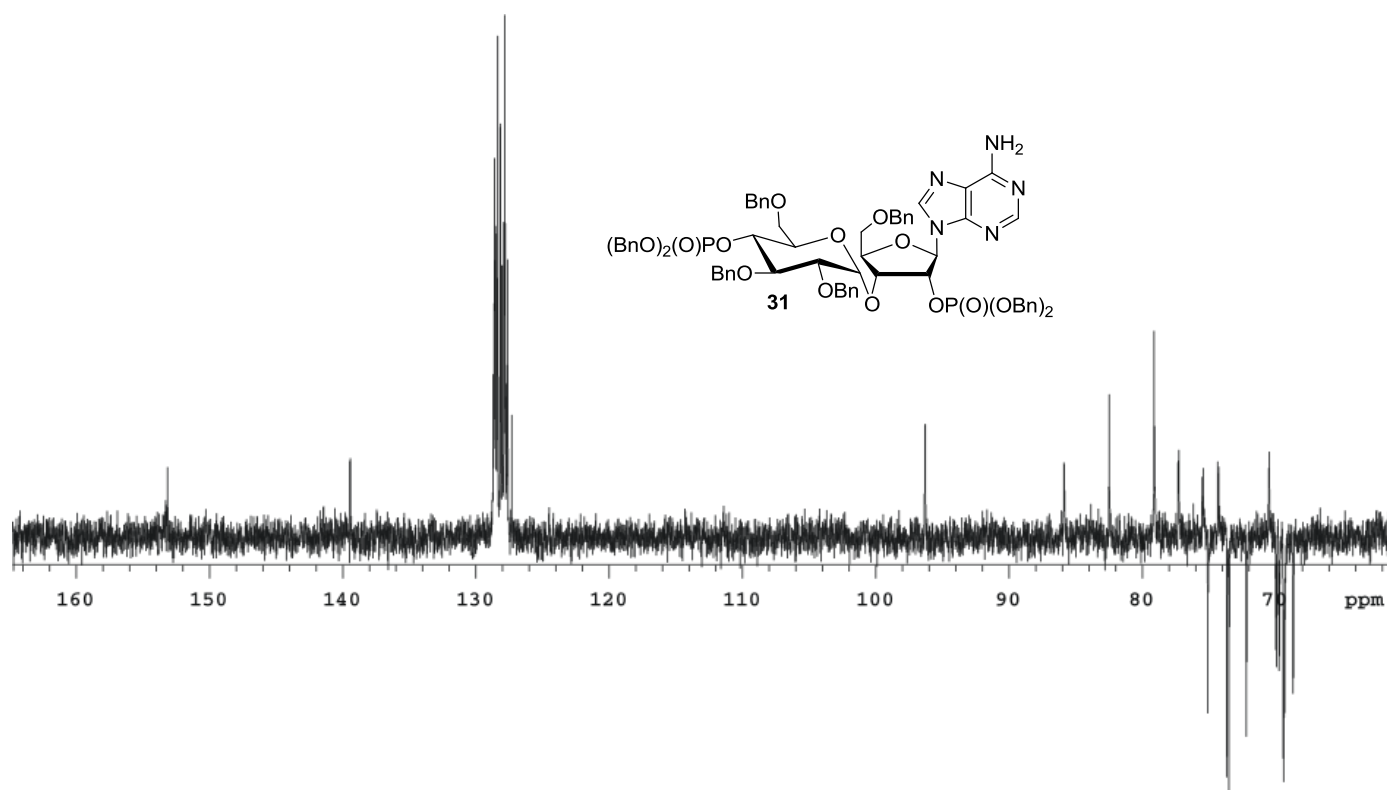

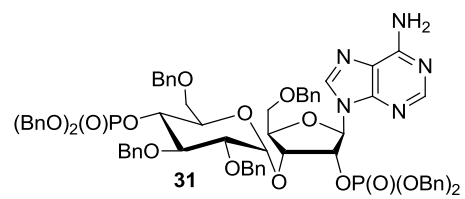

Filename: gHMQC\_01

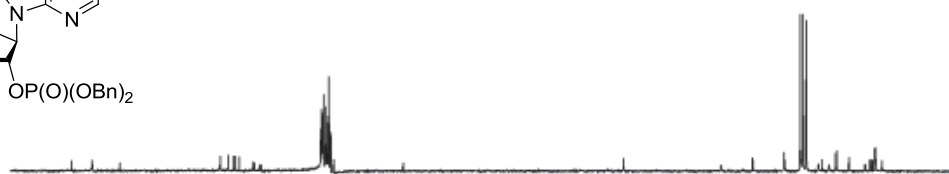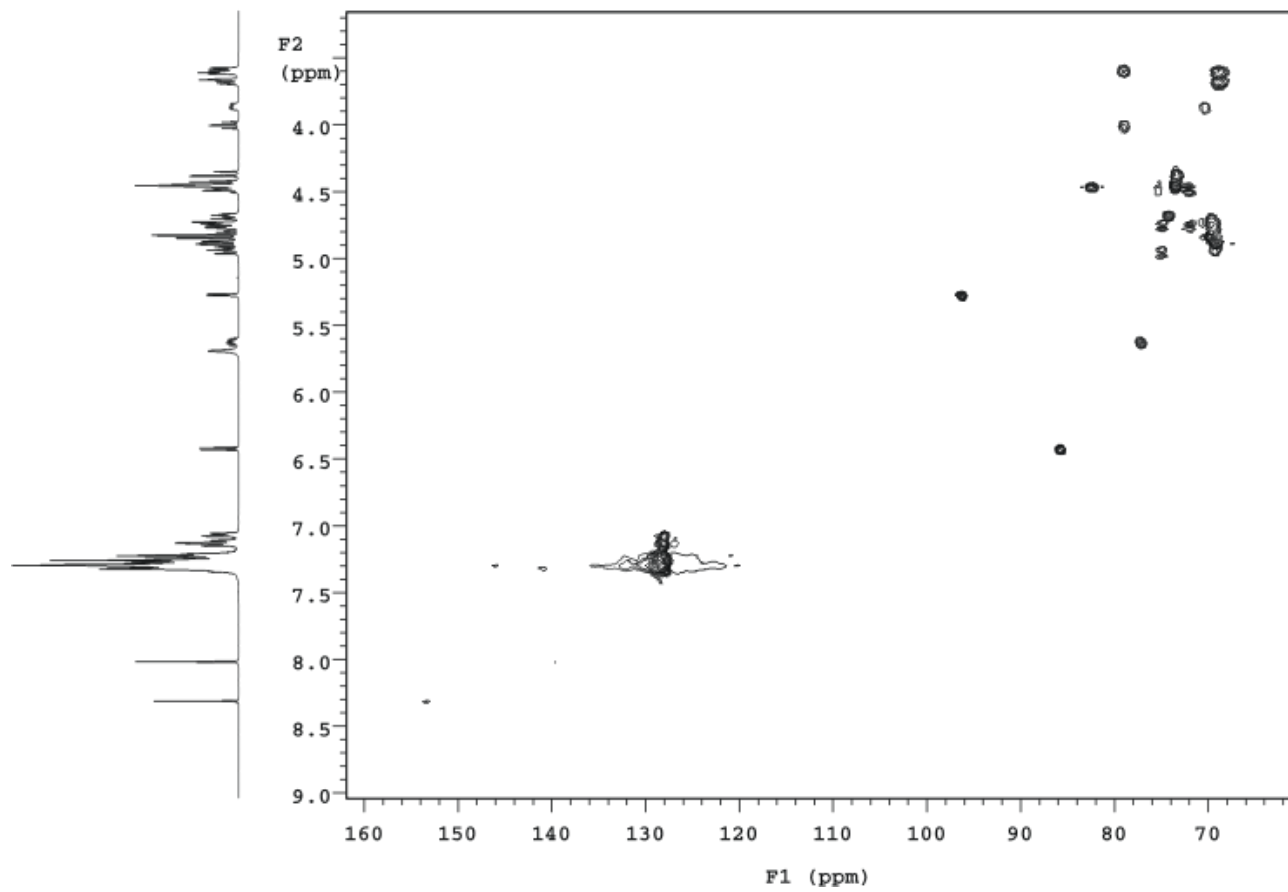

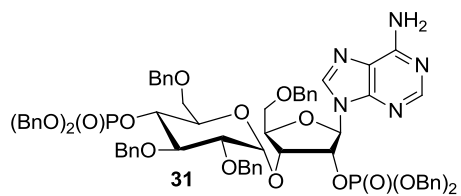

Filename: gHMBC\_01

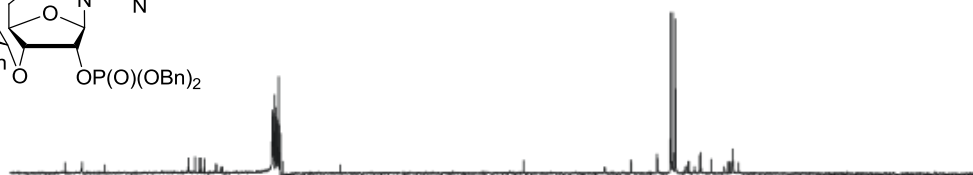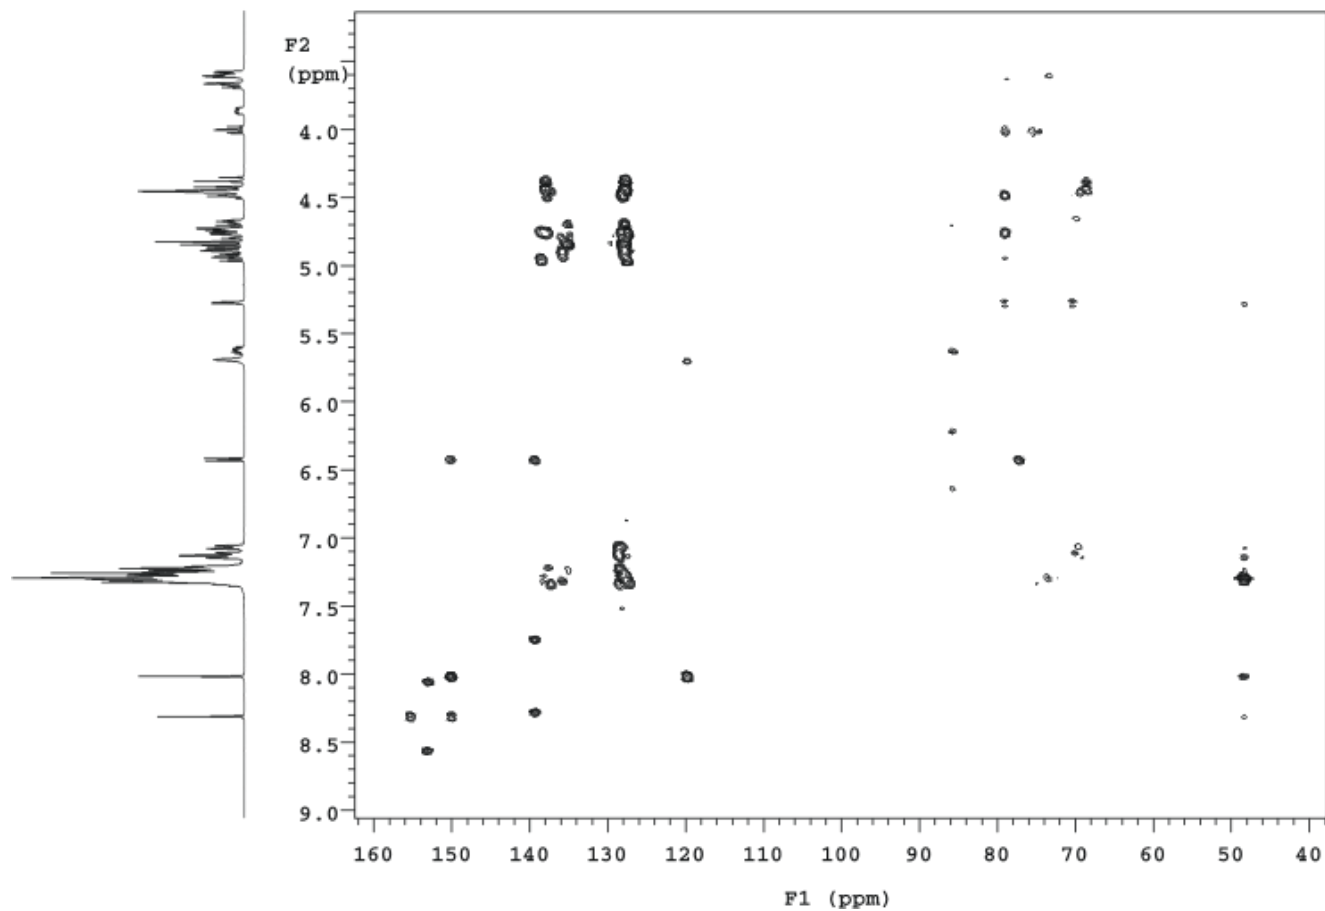

Sample: kms207b\_2006-06-12

Filename: NOESY\_01

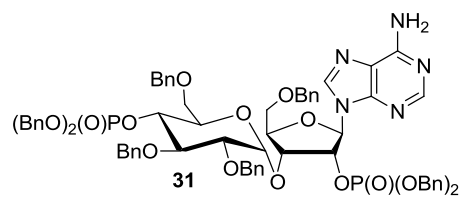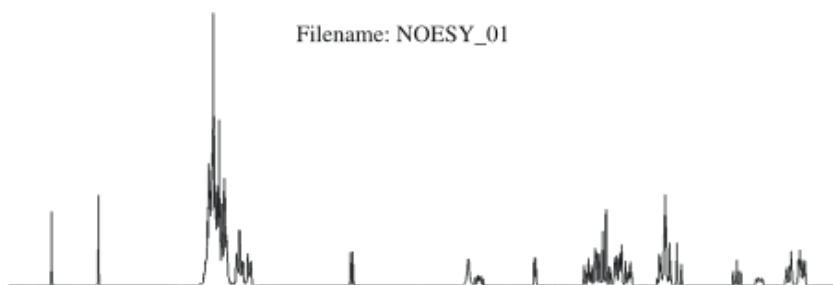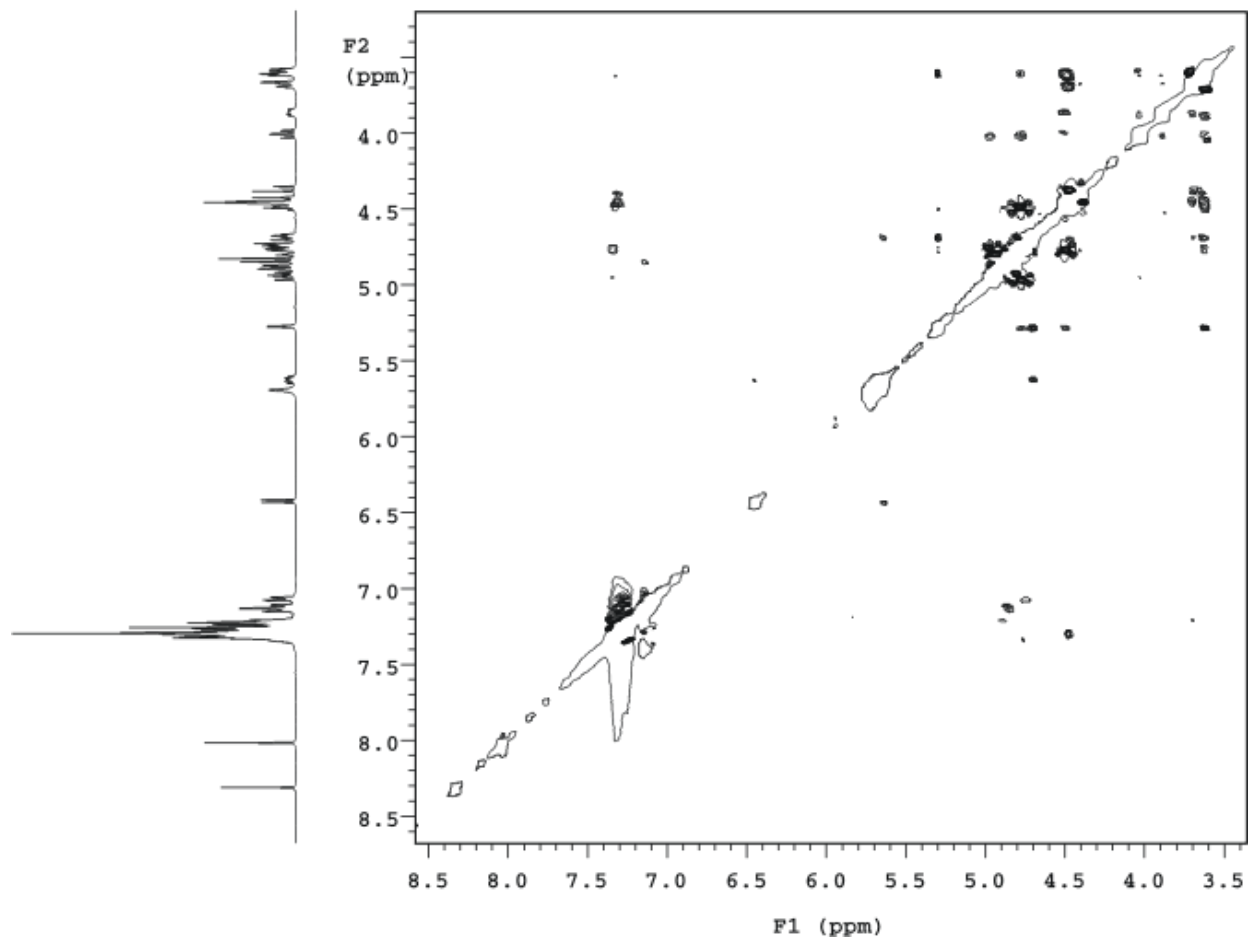

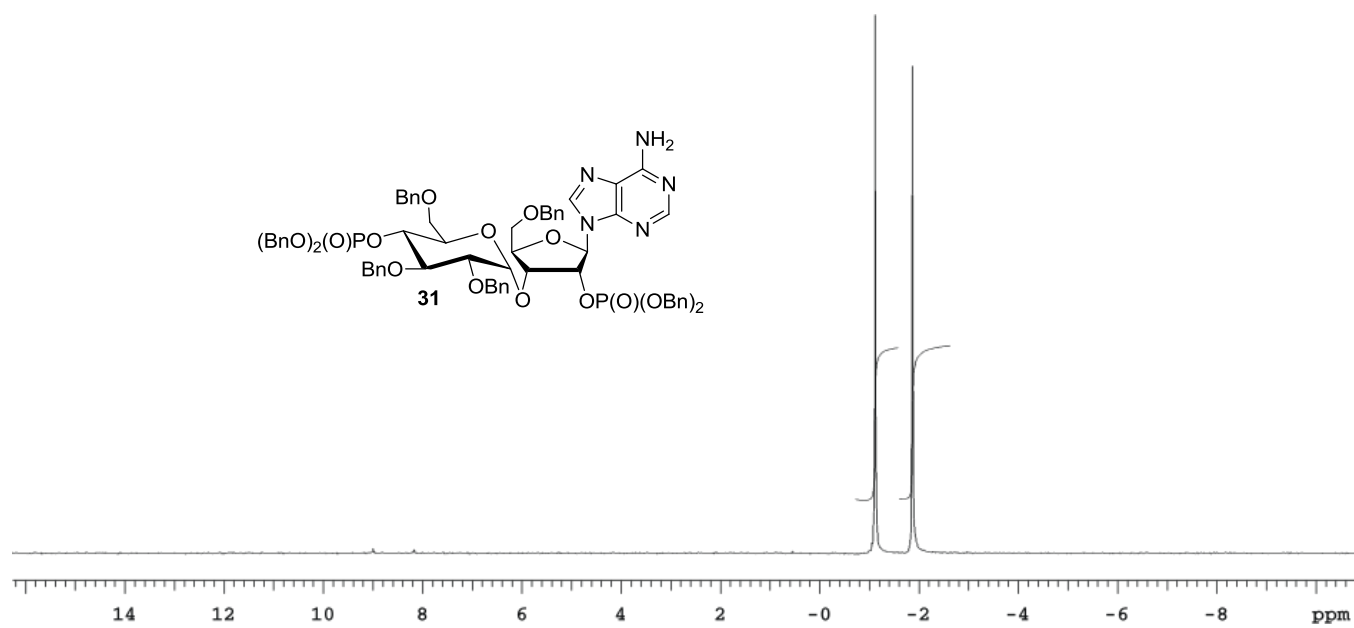

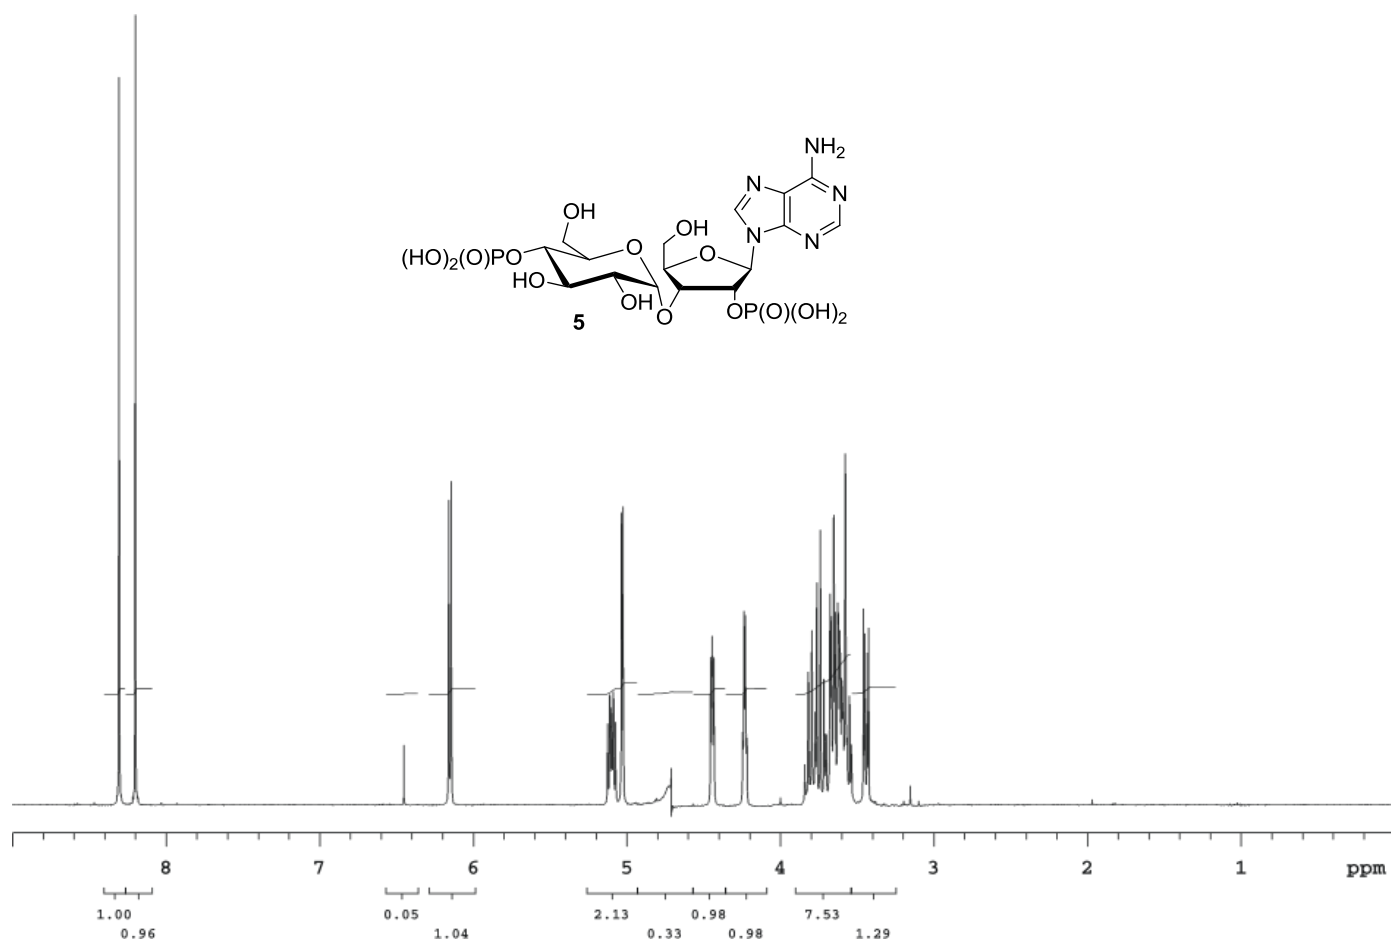

Sample: kms152\_2005-11-14

Filename: gCOSY\_01

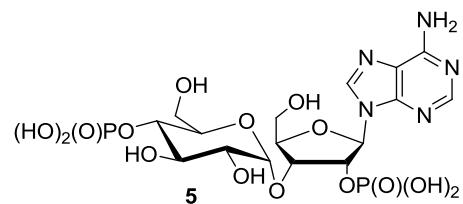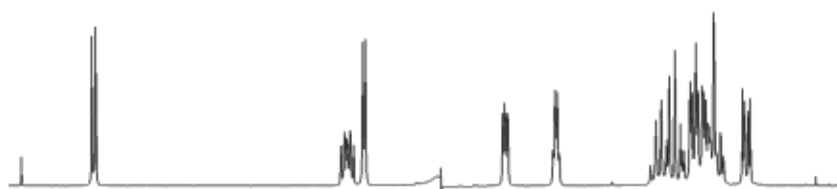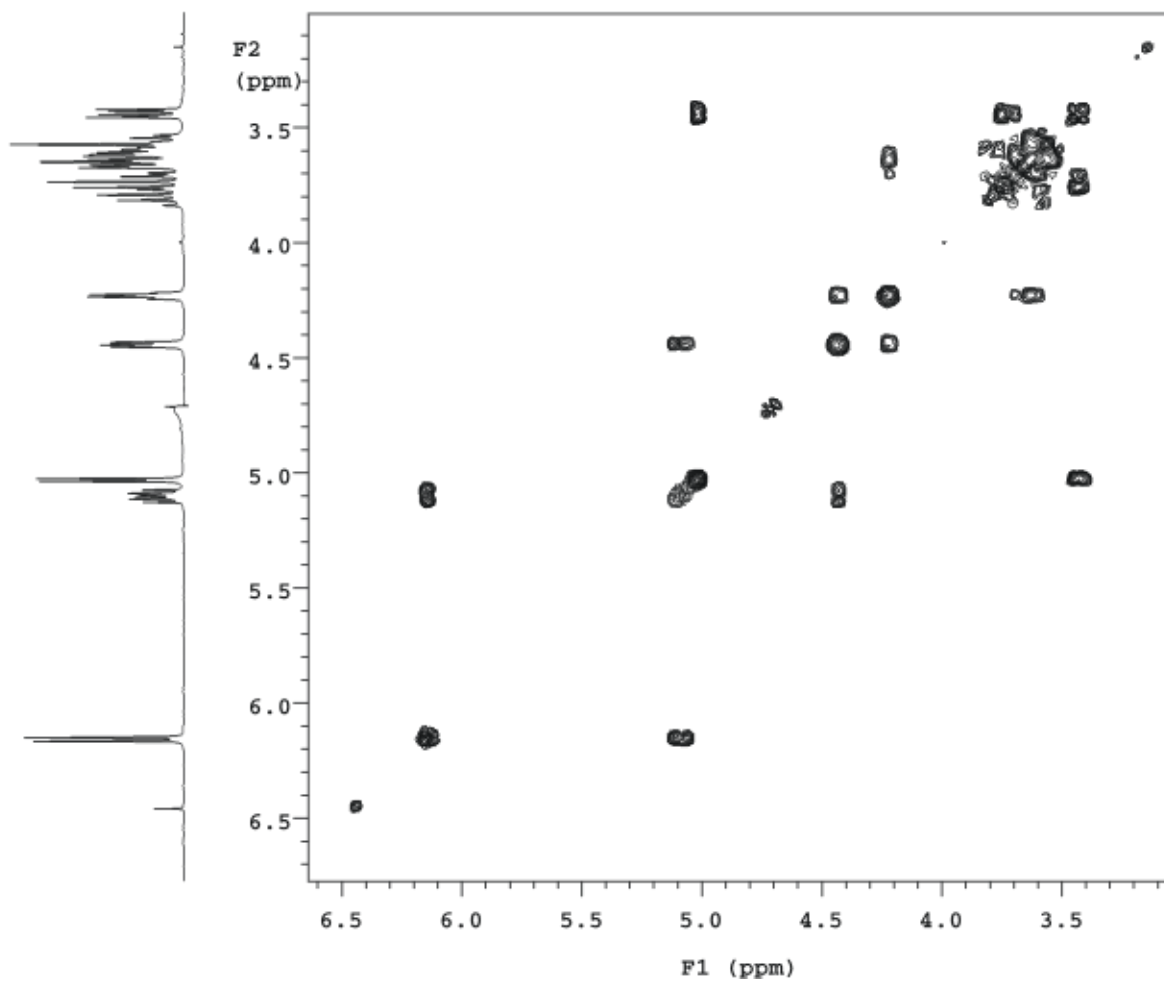

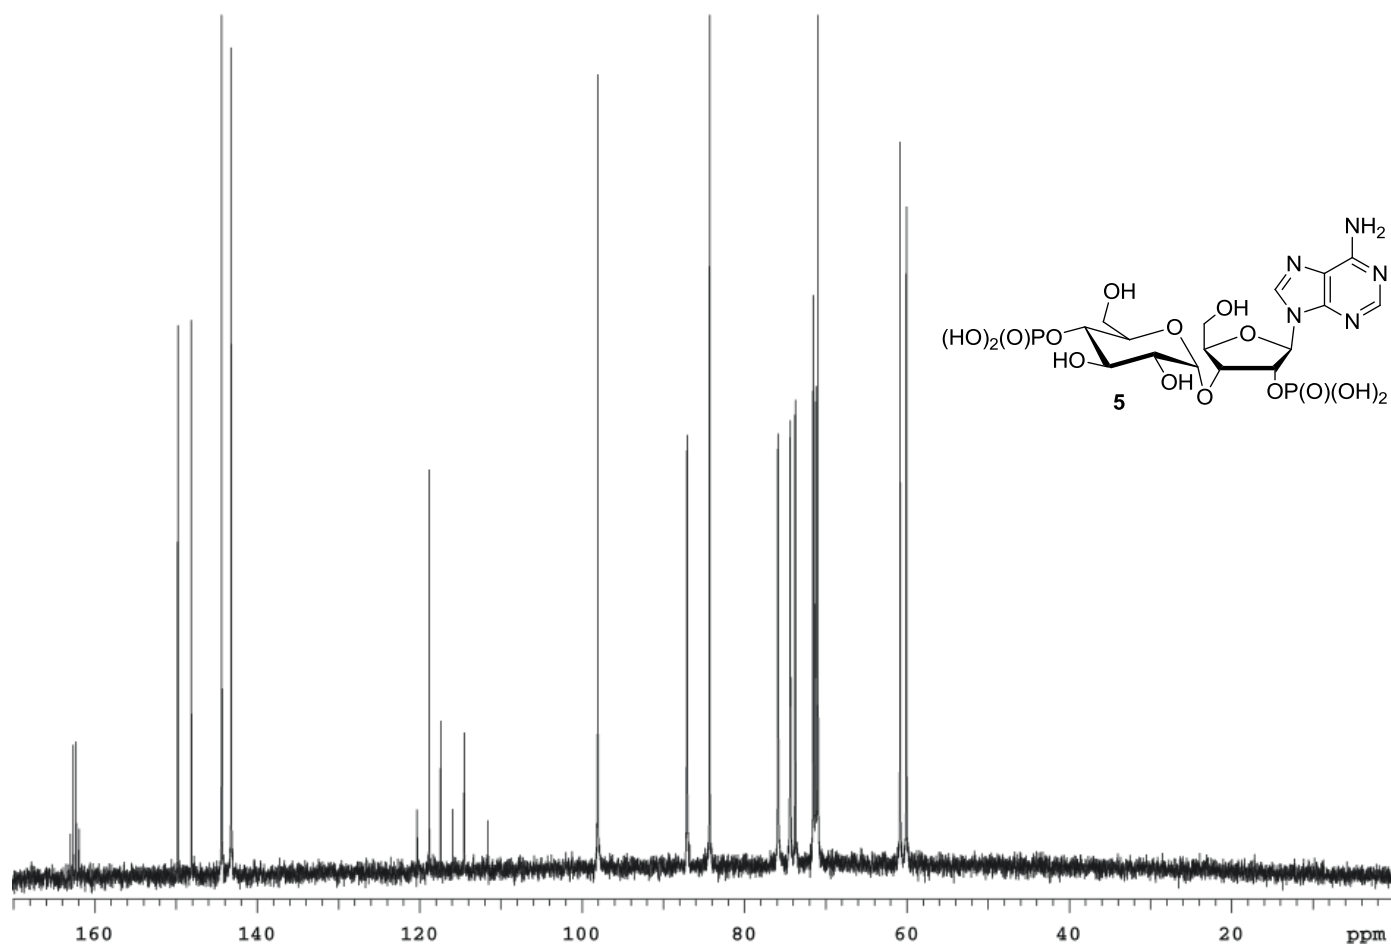



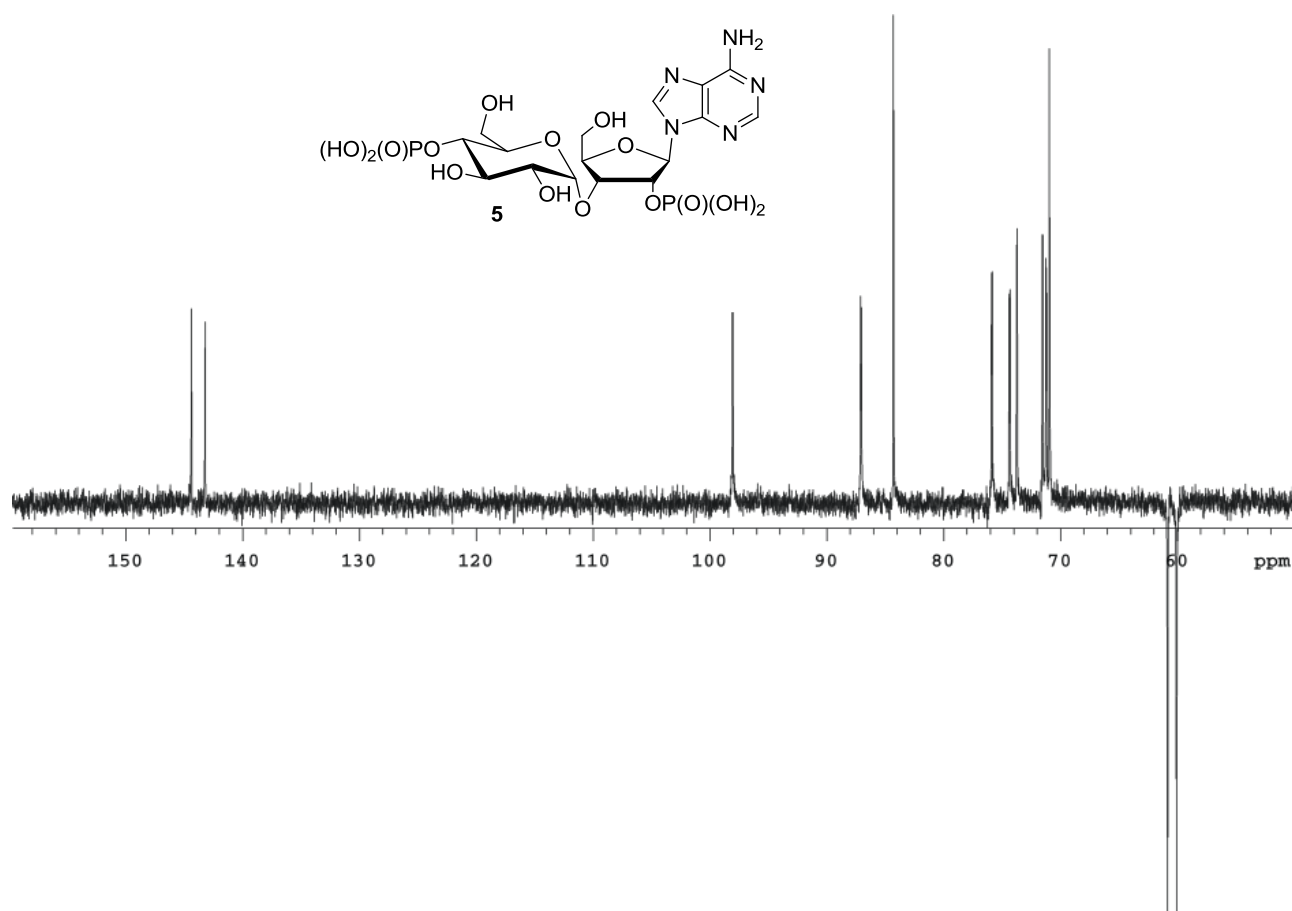

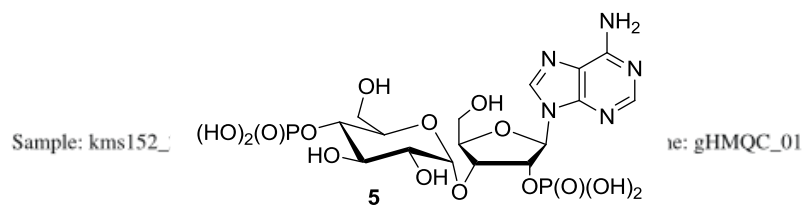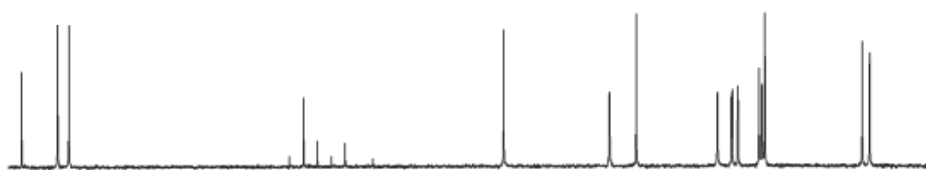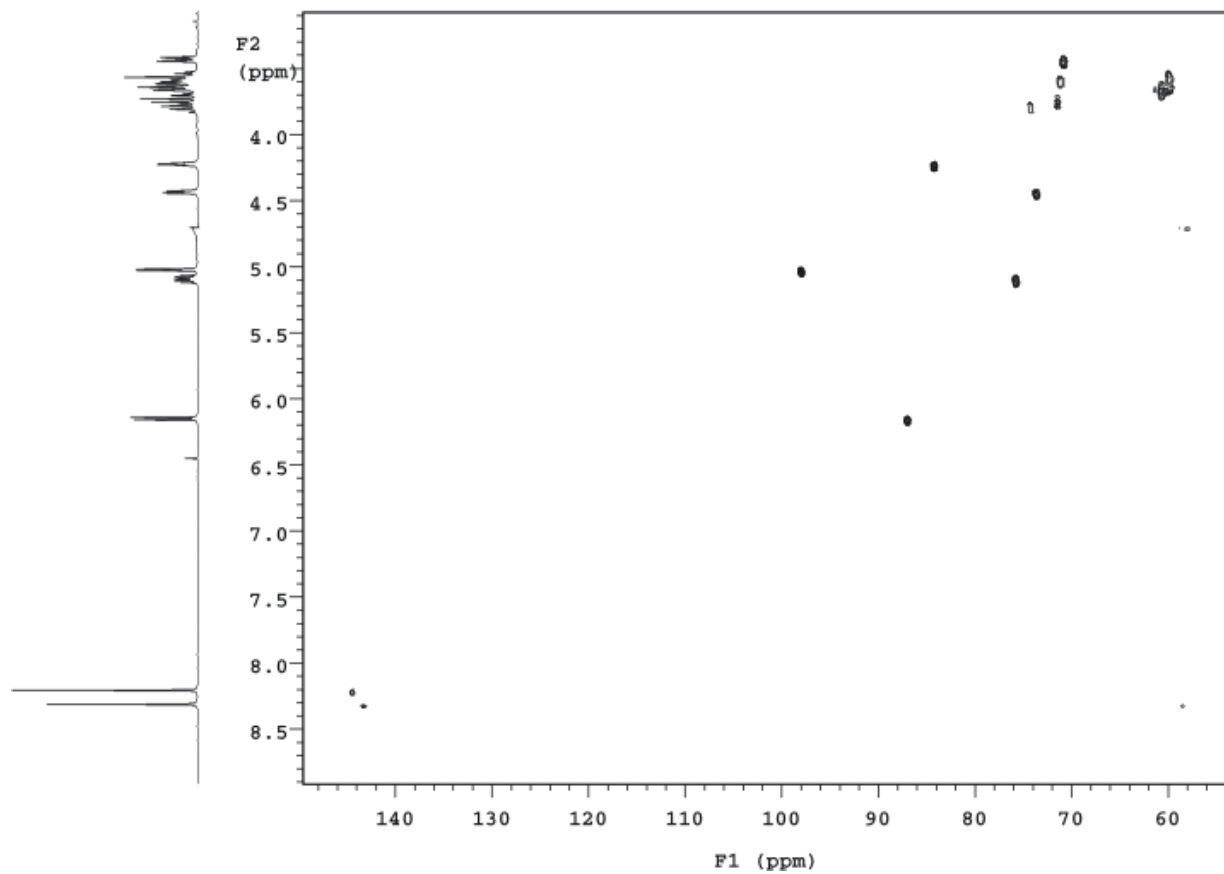

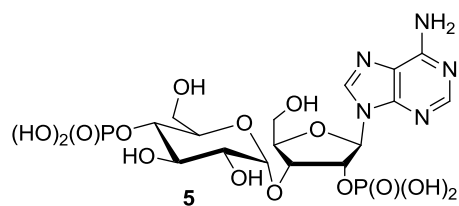

Filename: gHMBC\_01

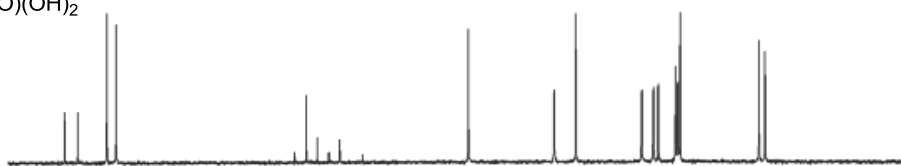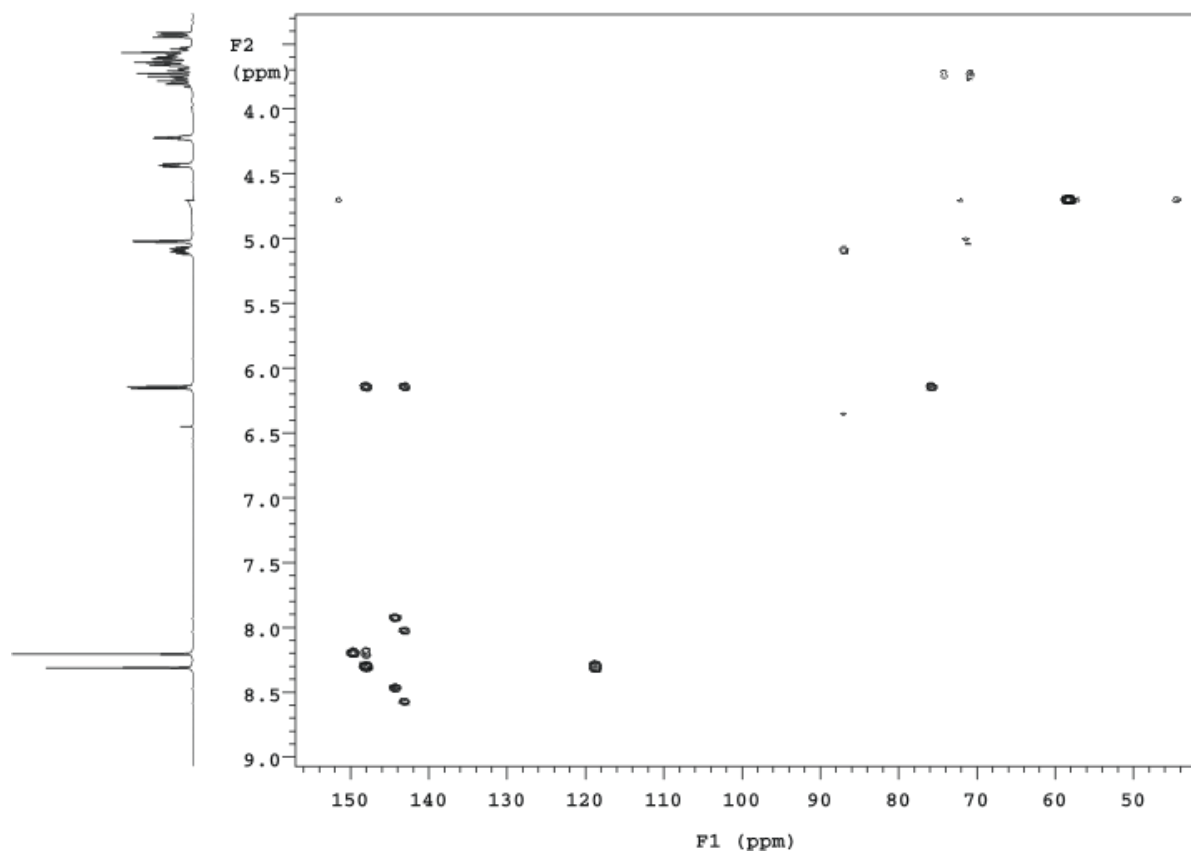

Filename: NOESY\_01

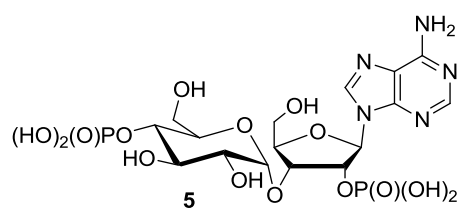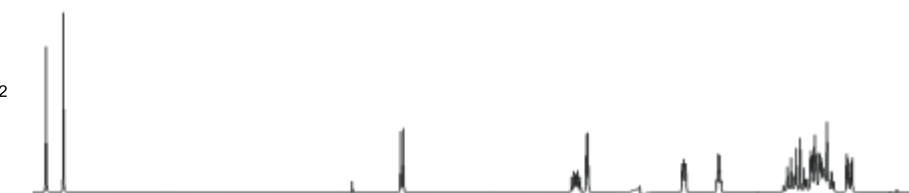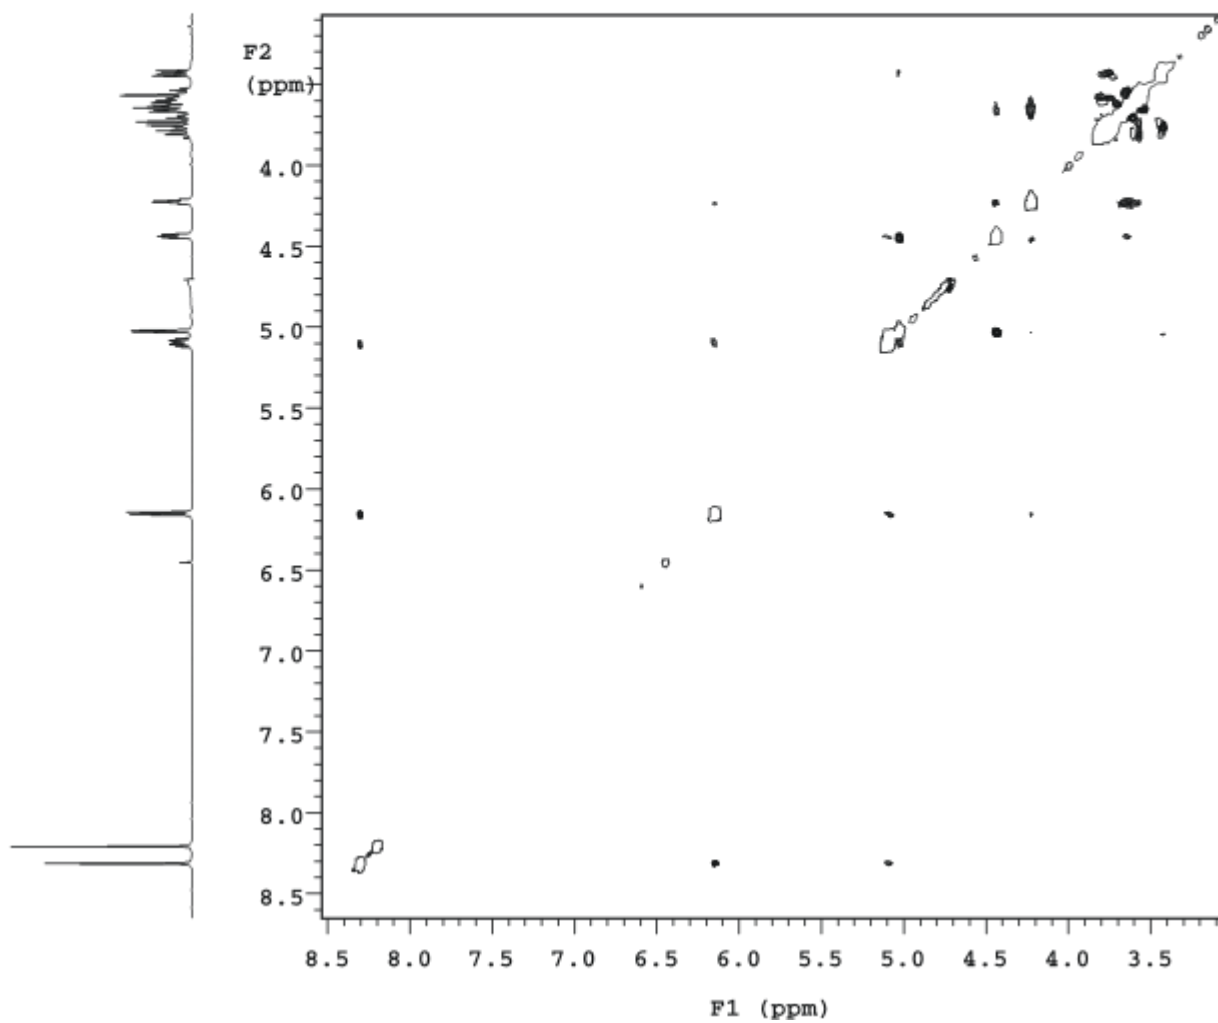

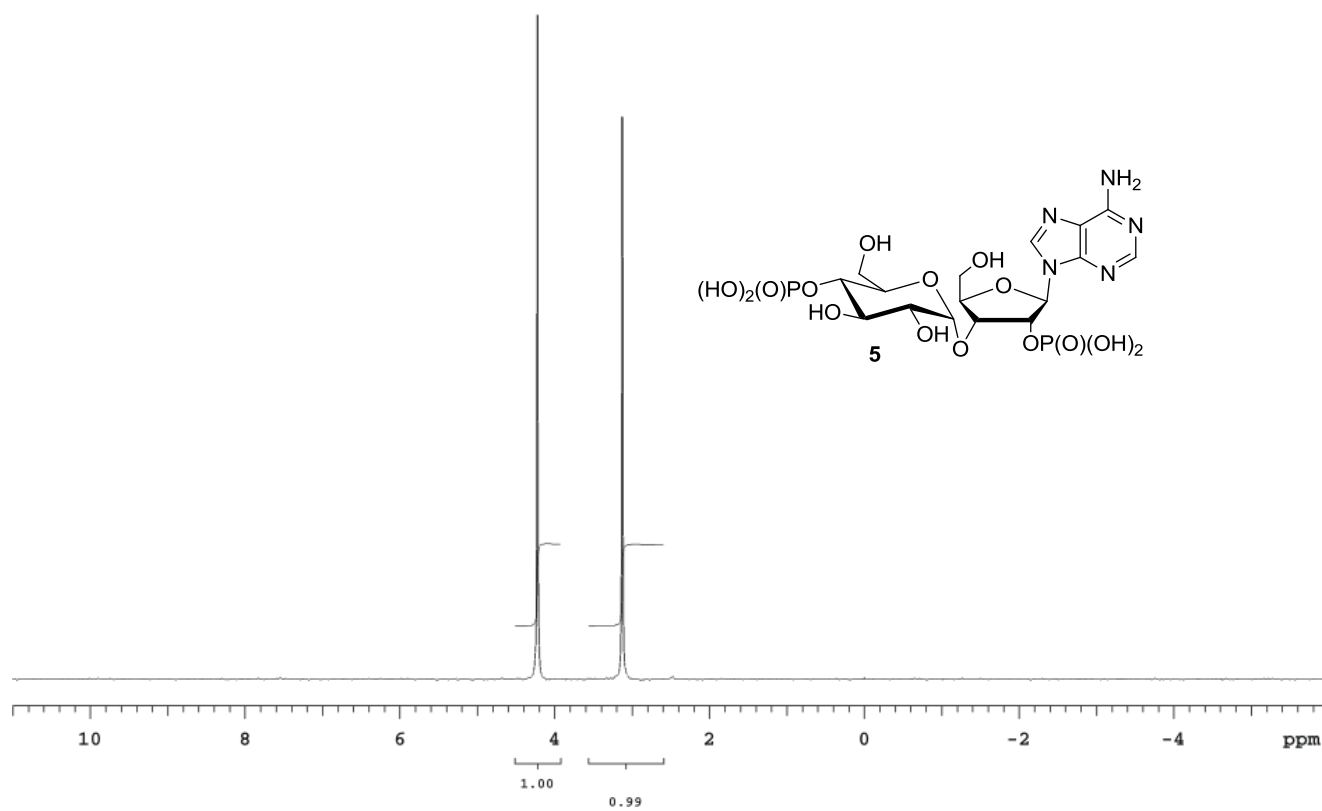

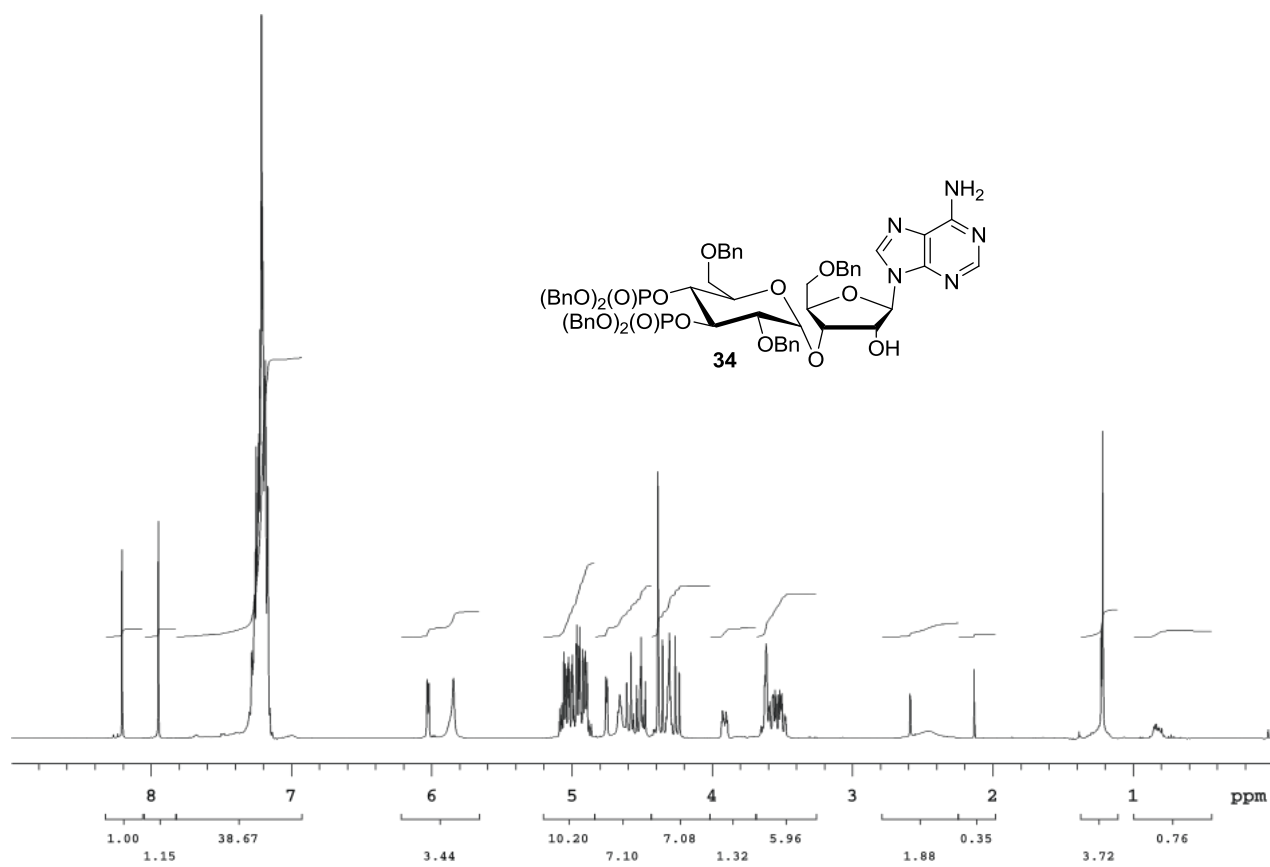

Sample: kms149\_2005-11-02

Filename: gCOSY\_01

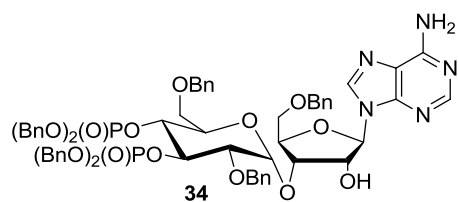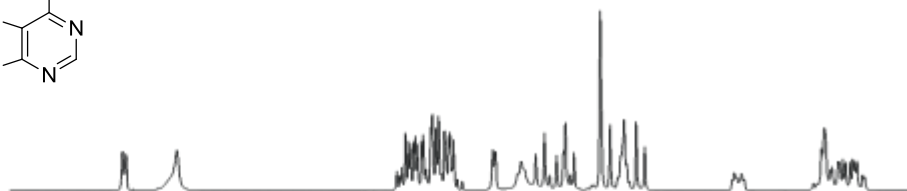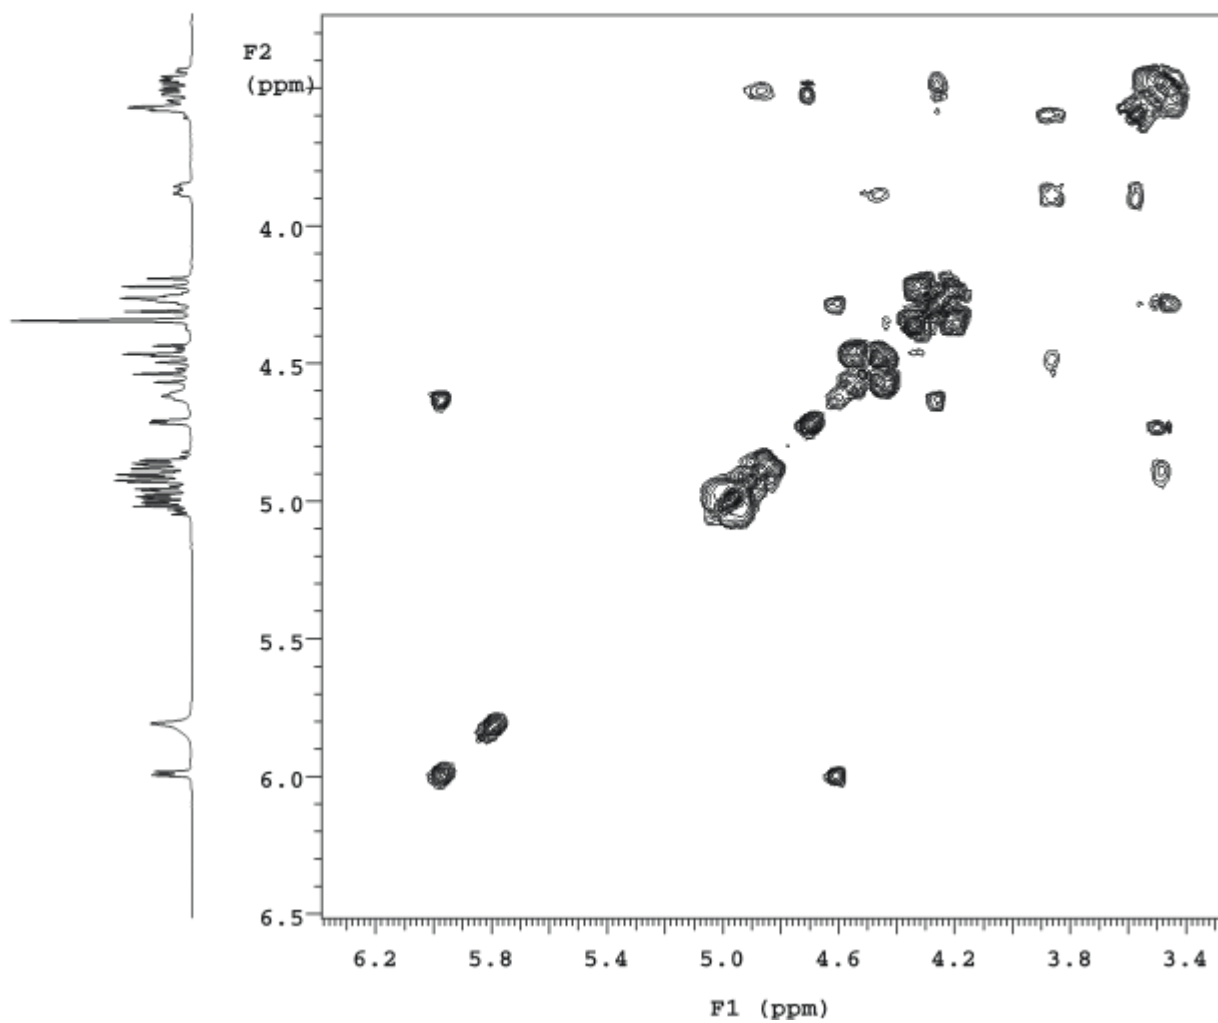

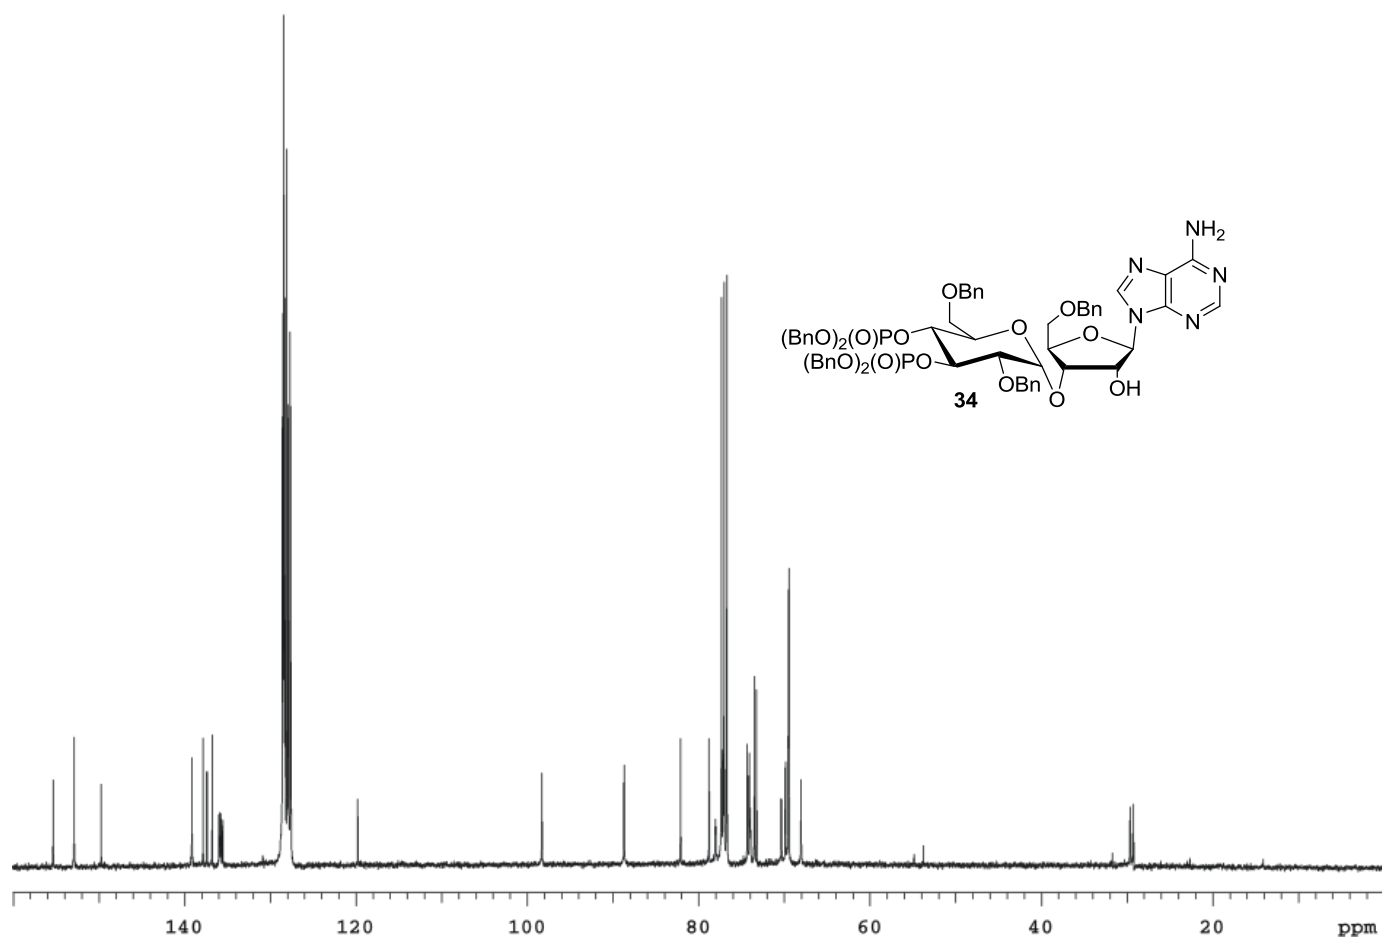



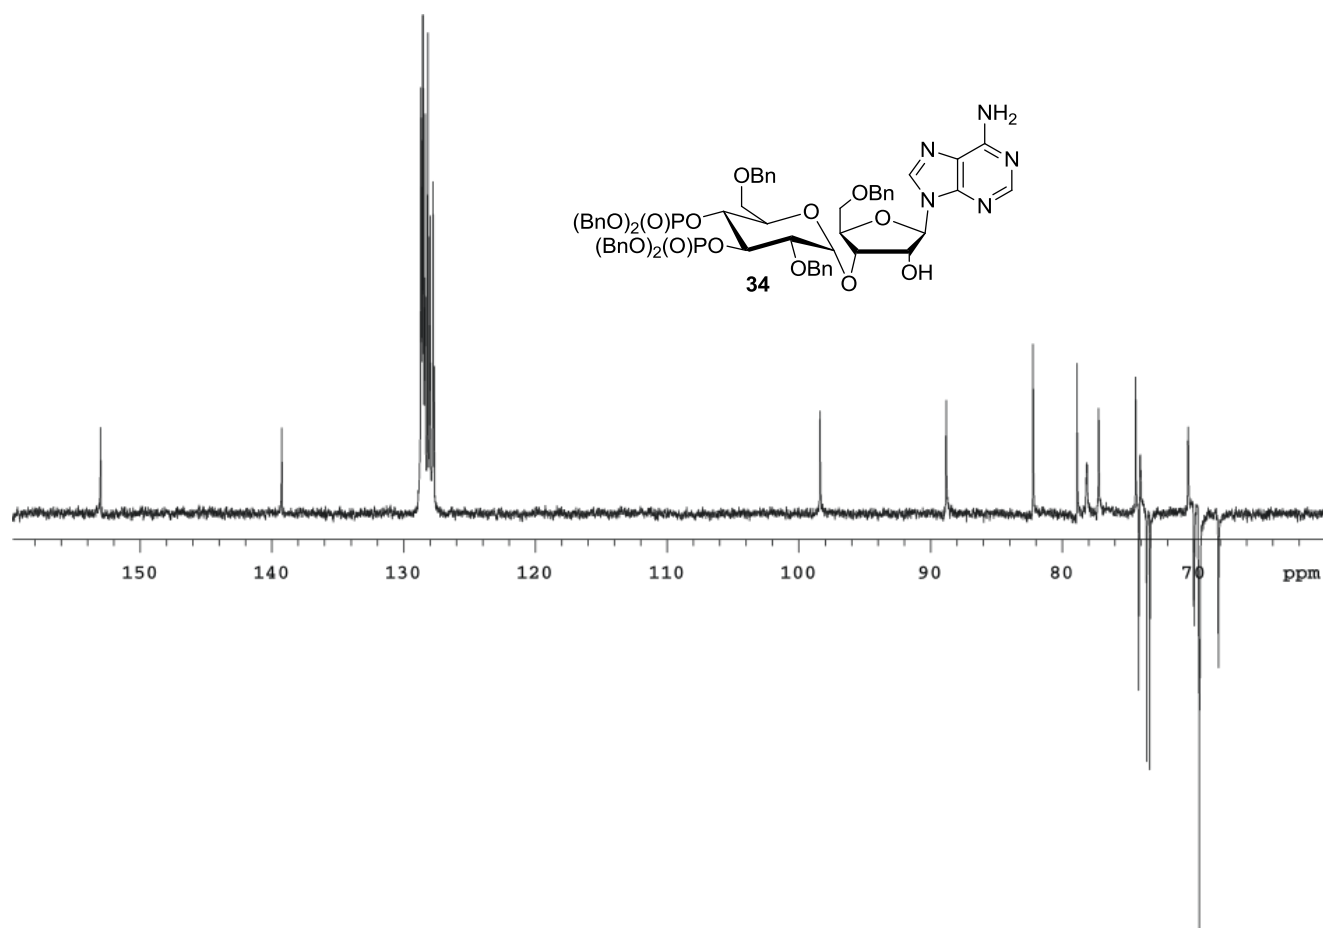

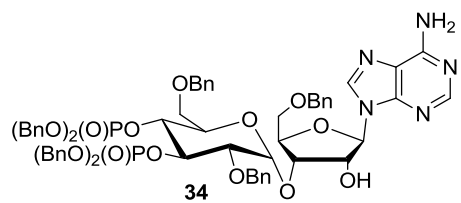

Filename: gHMQC\_01

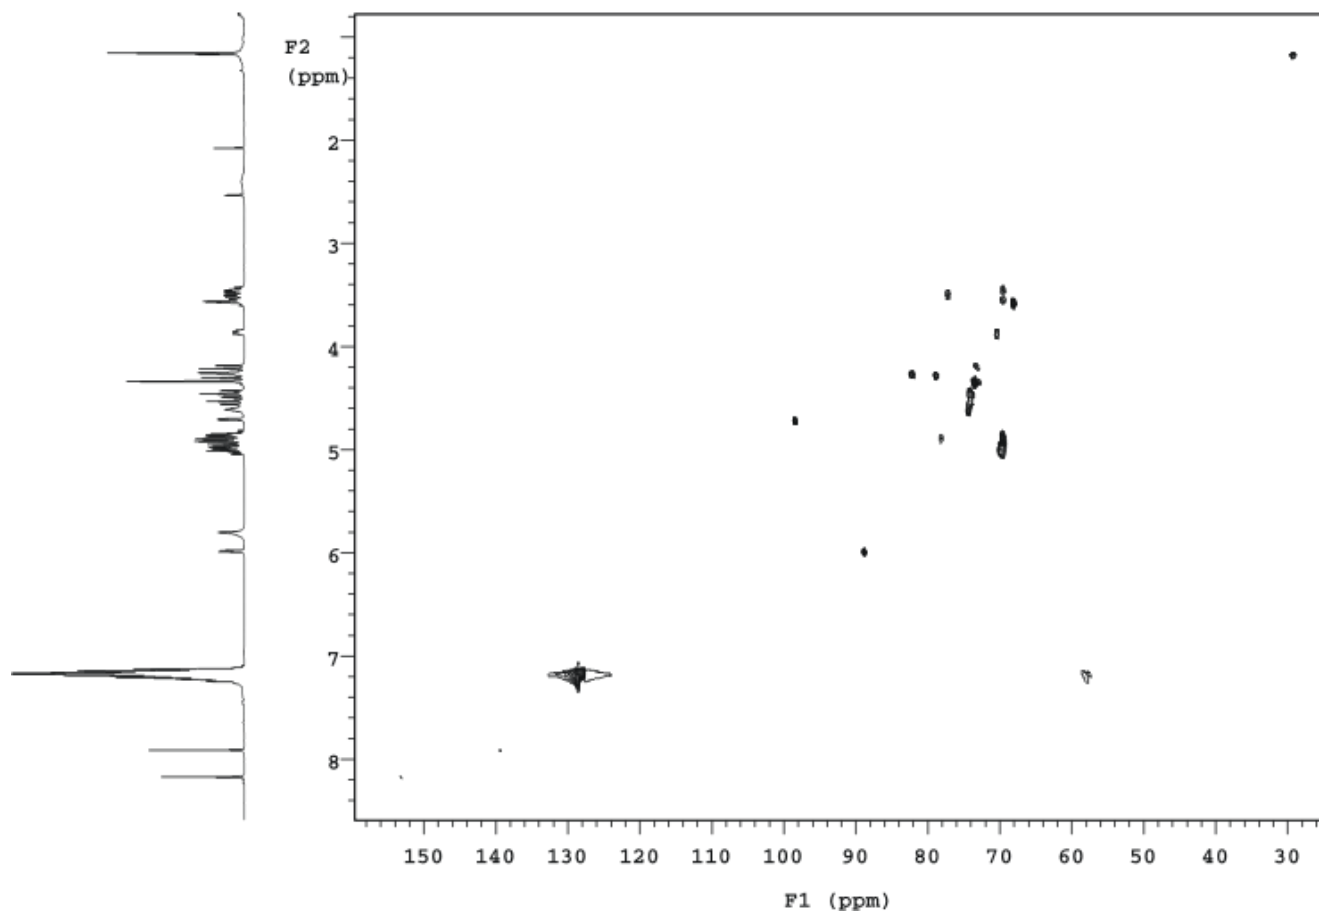

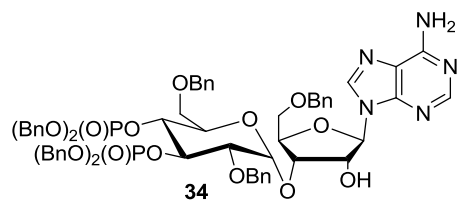

Filename: gHMBC\_01

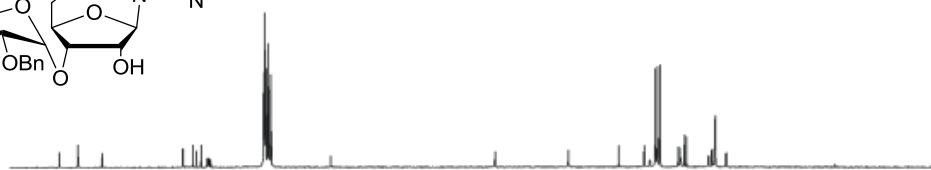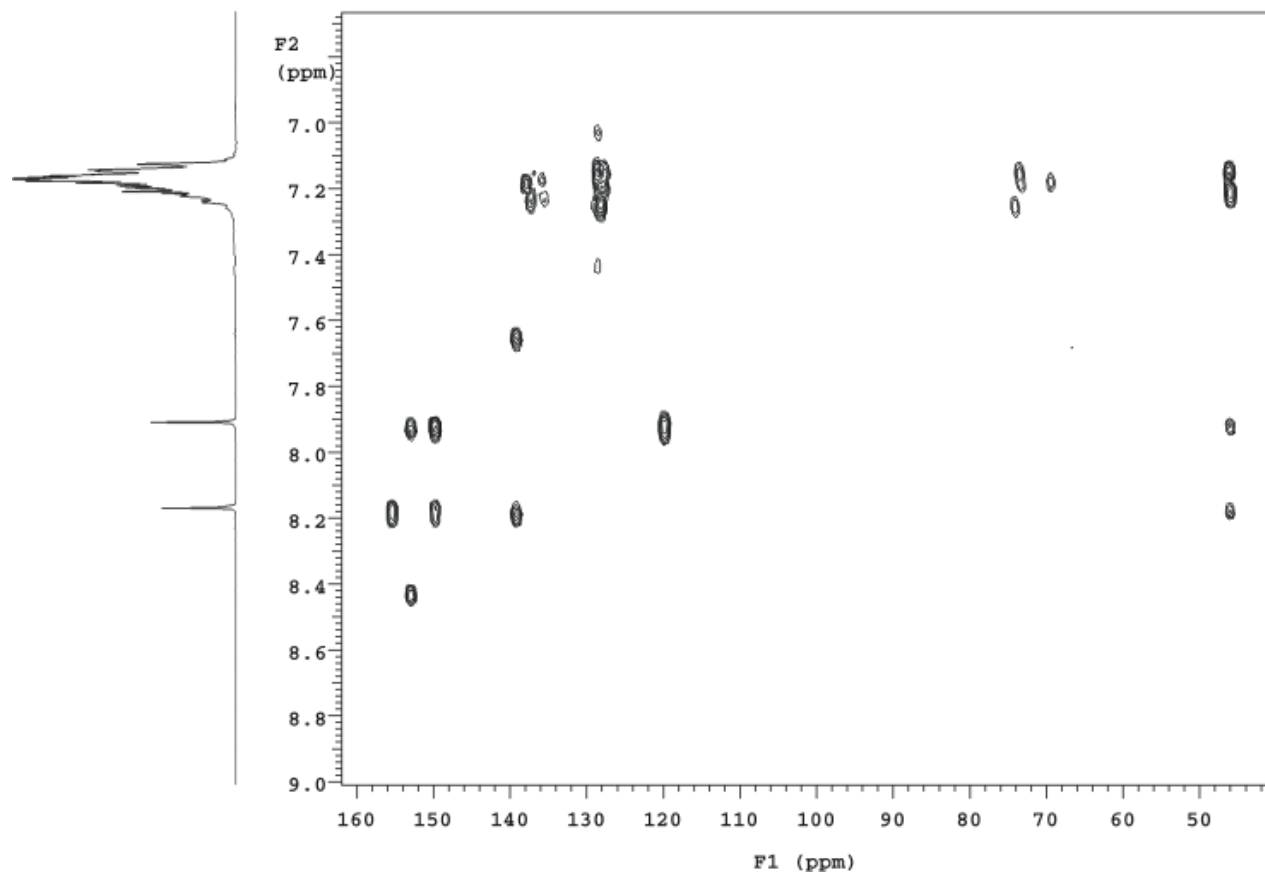

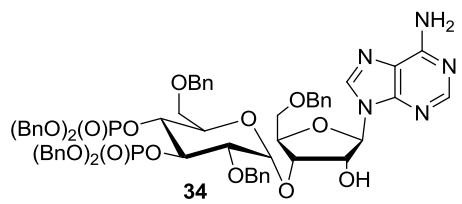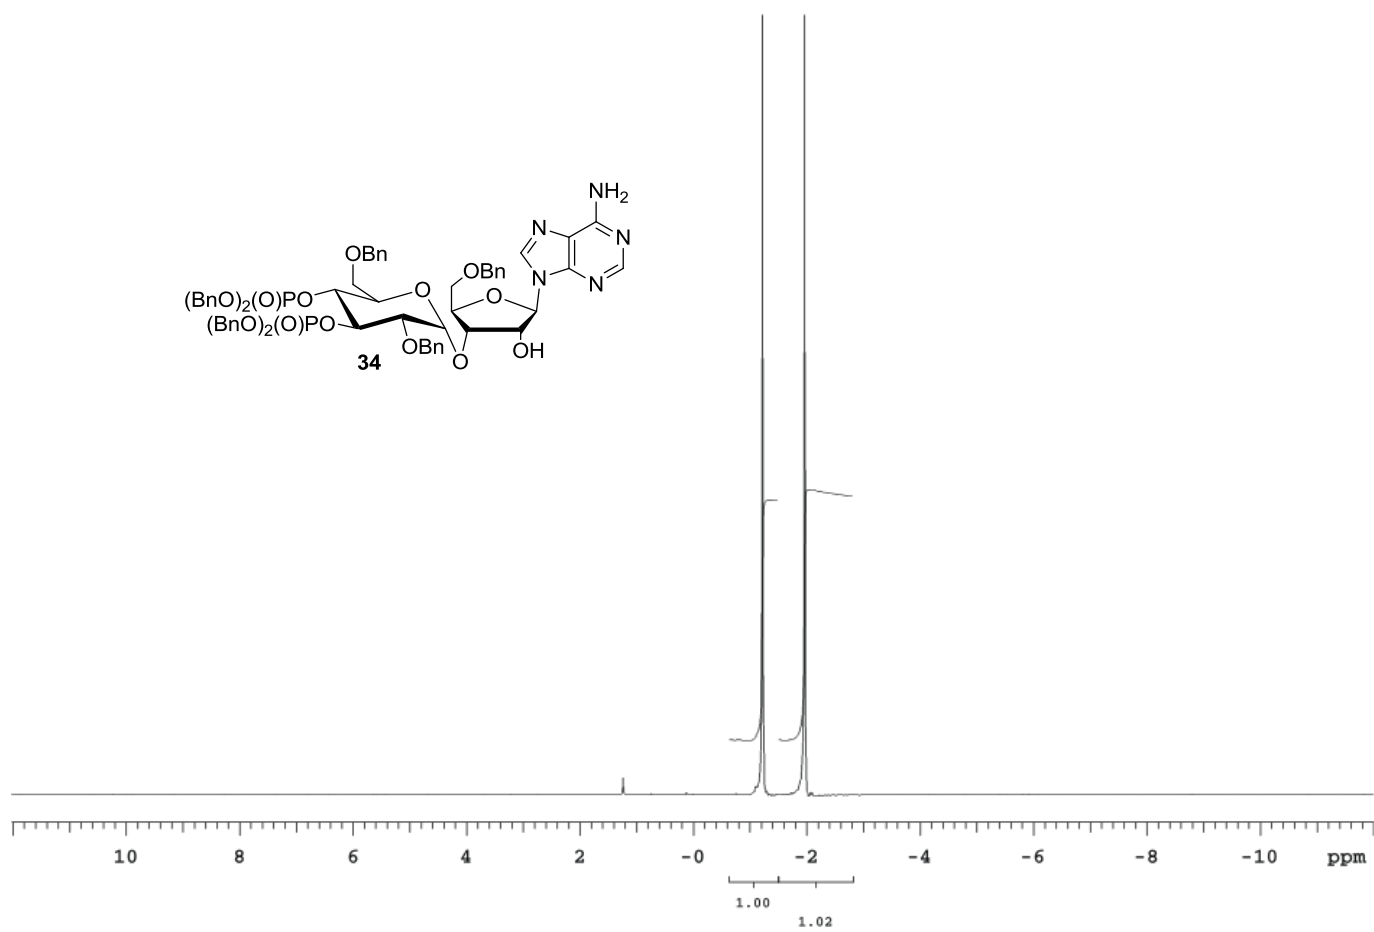

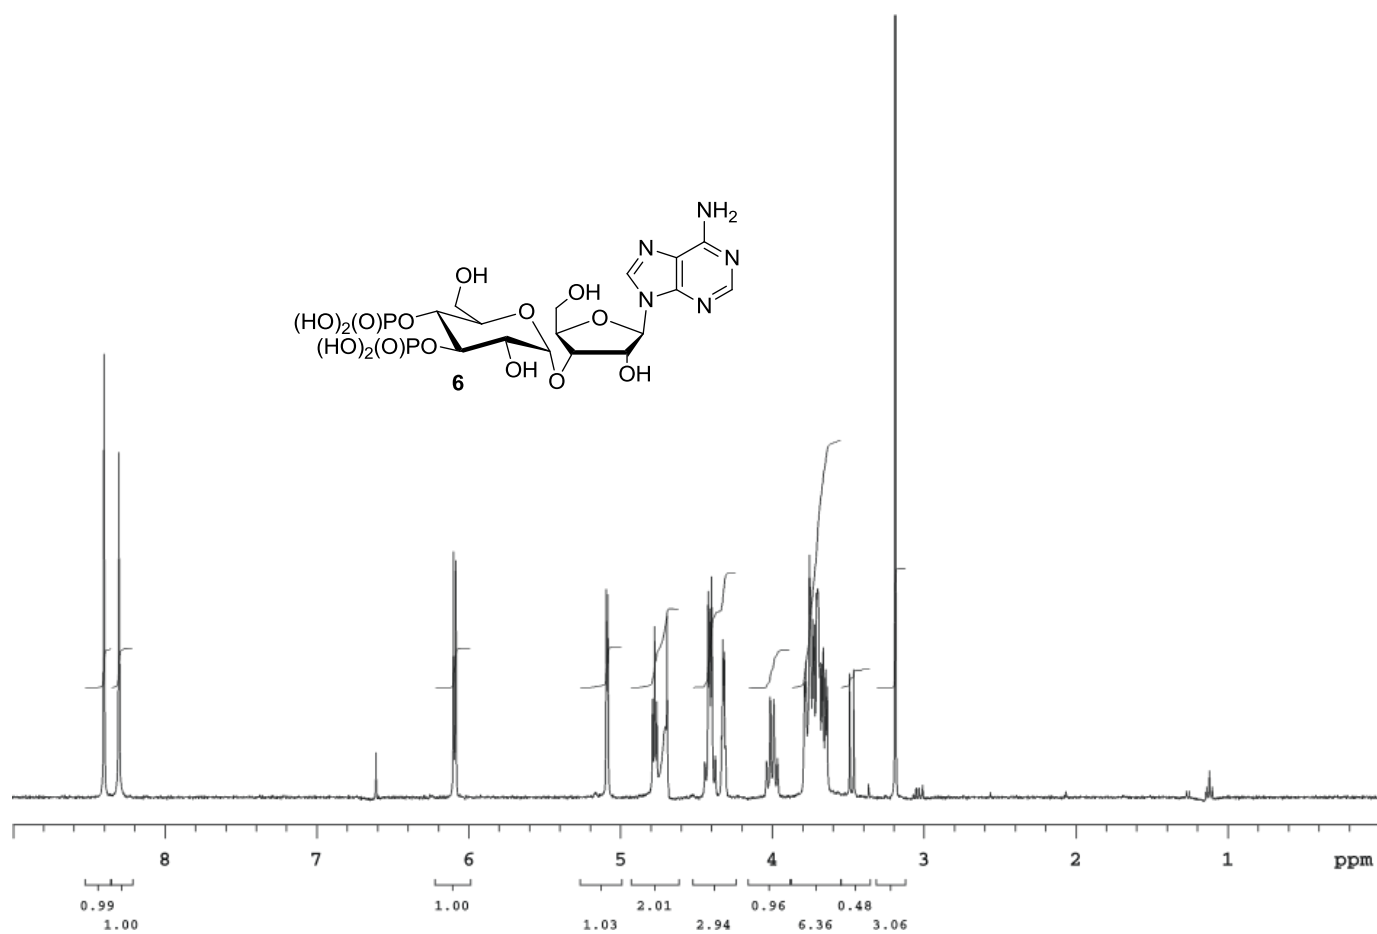



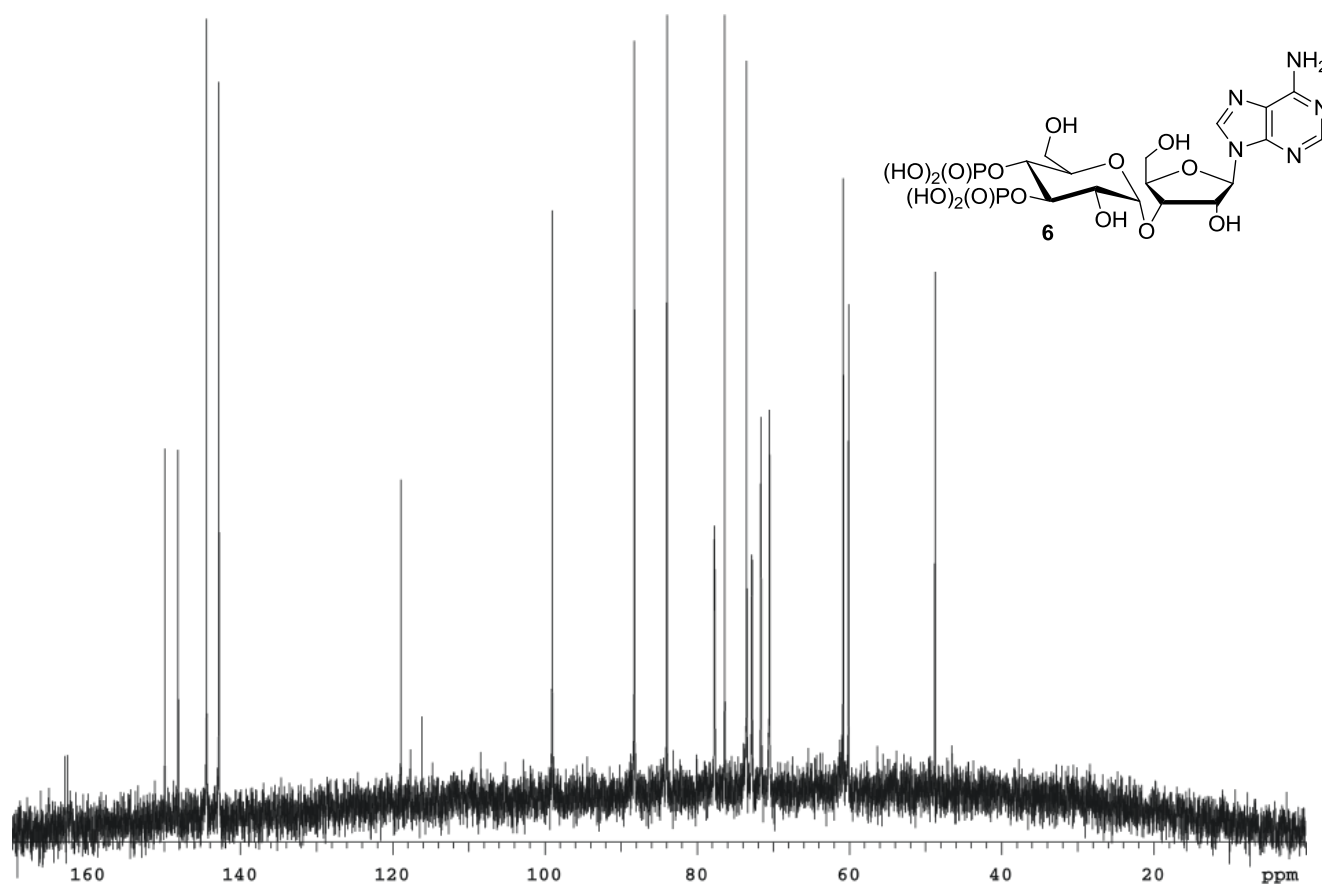

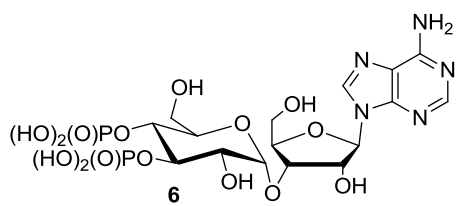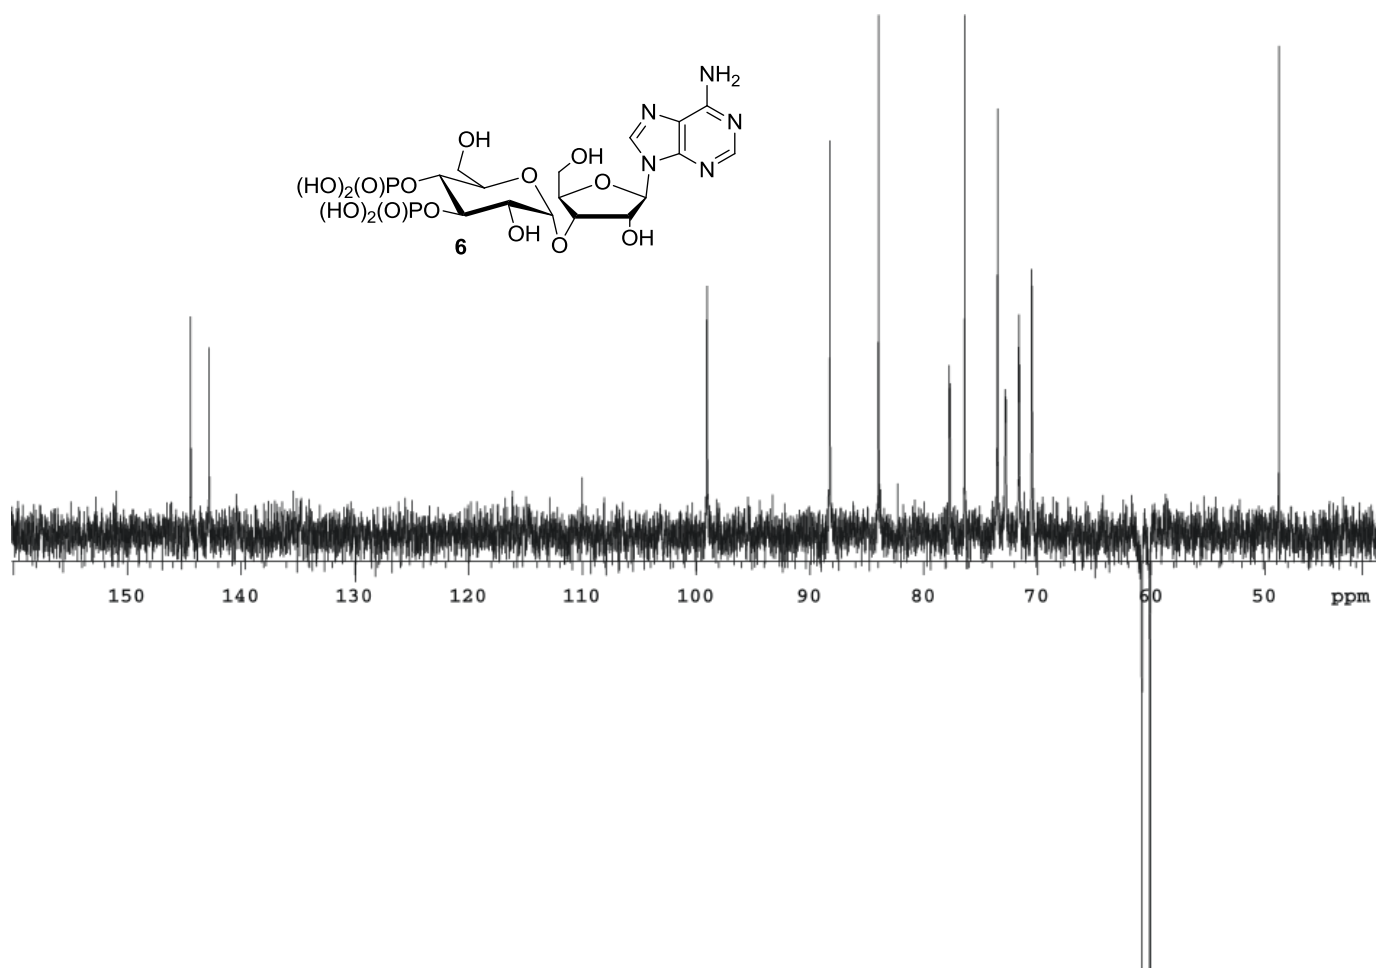



Sample: kms158\_2005-11

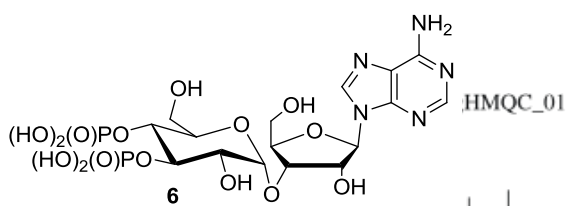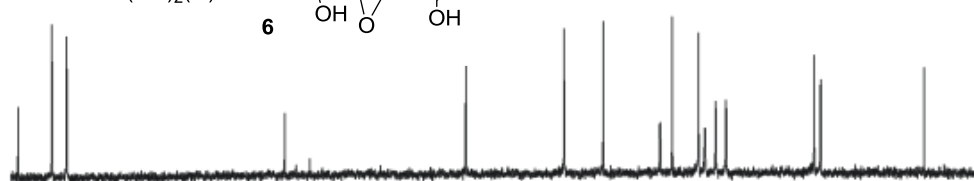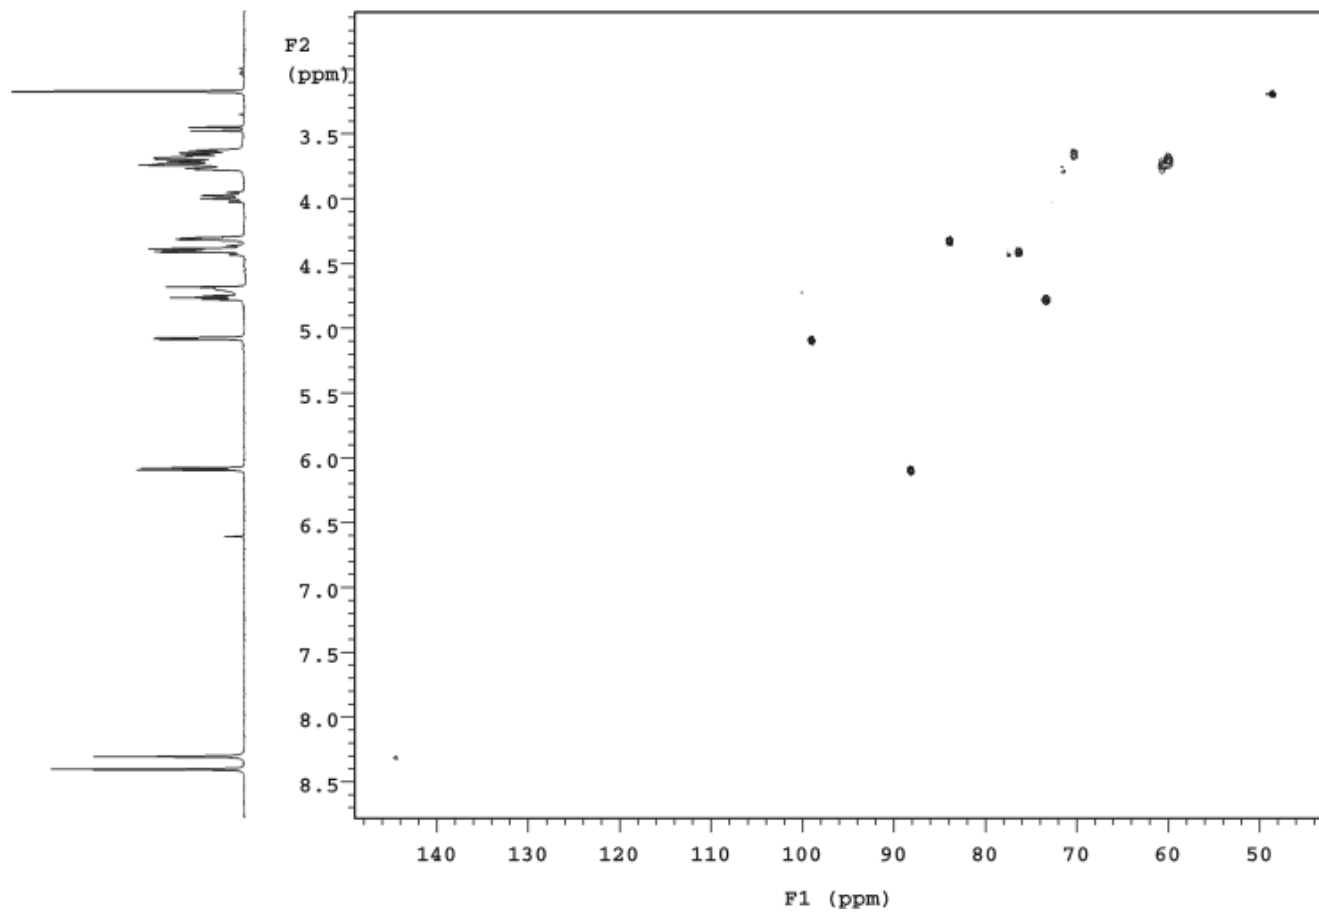

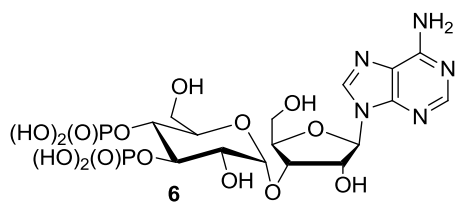

Filename: gHMBC\_01

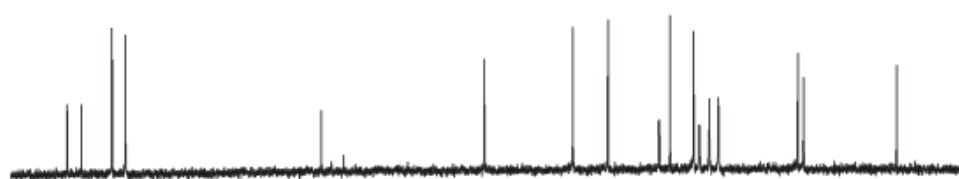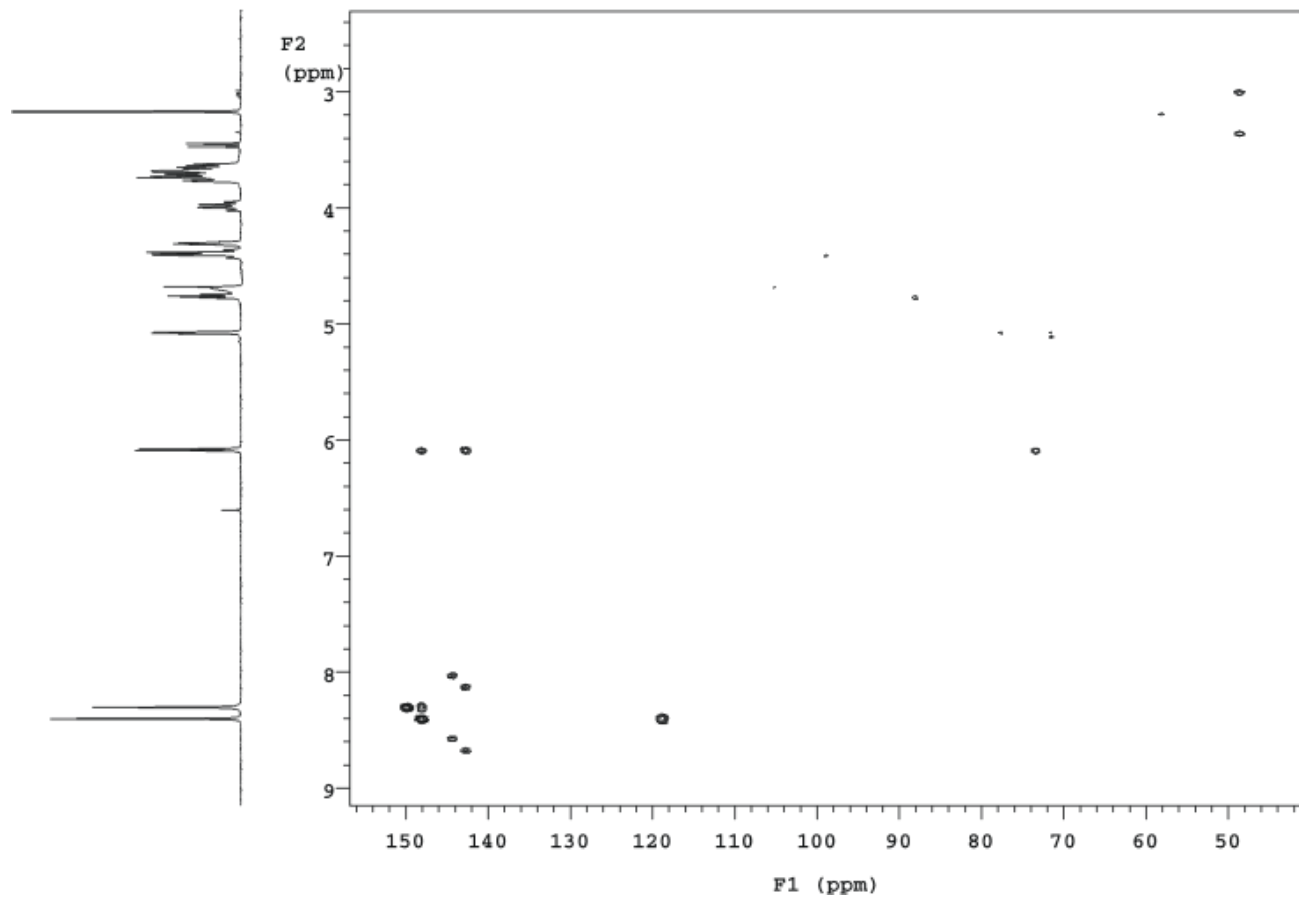

Sample: kms158\_2005-11-25

Filename: NOESY\_01

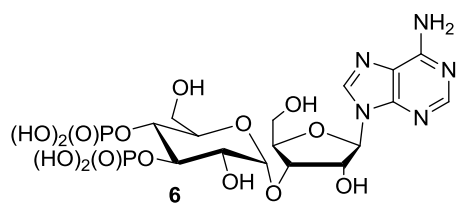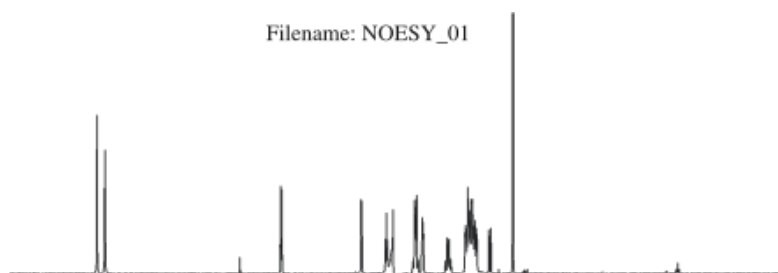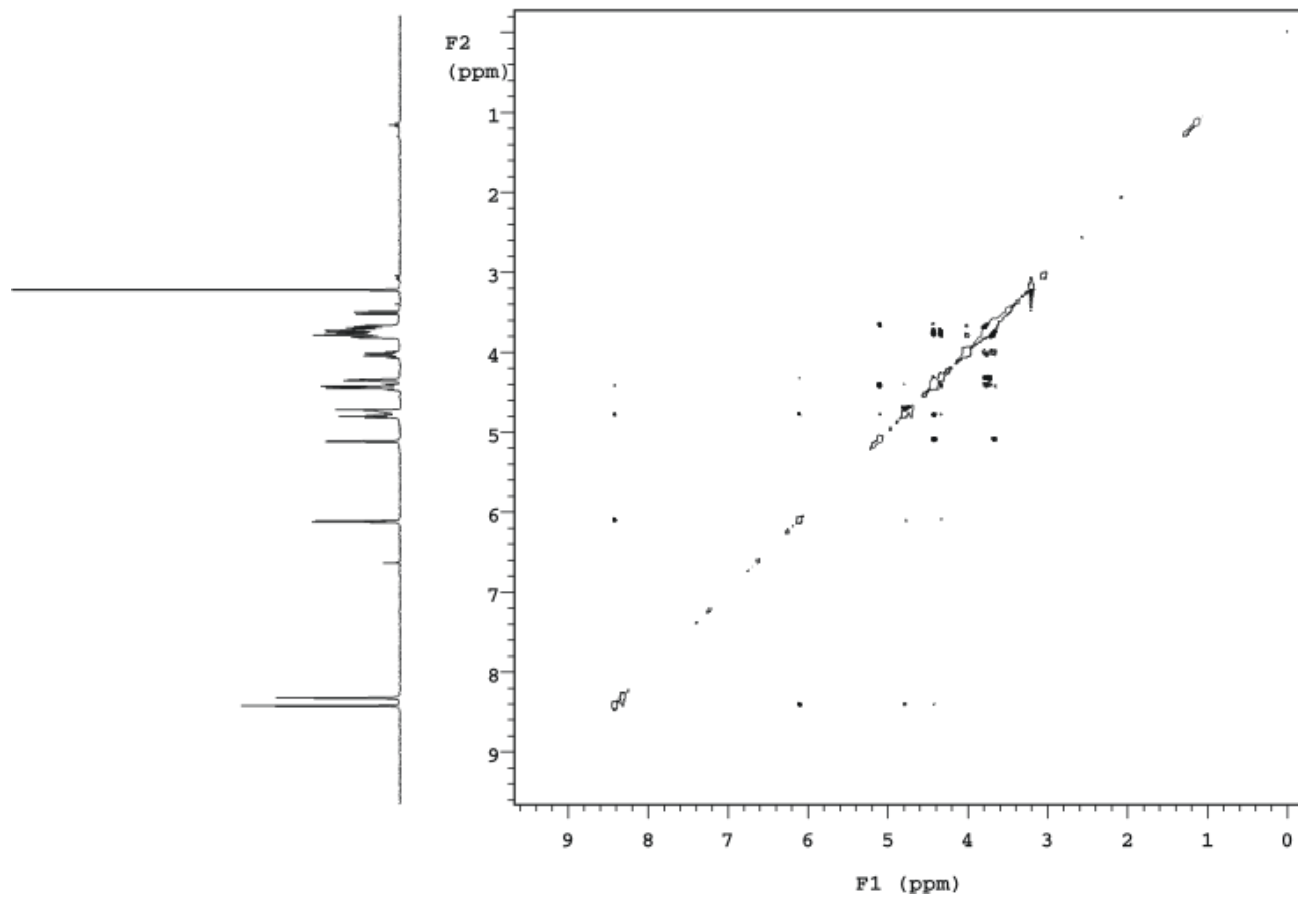

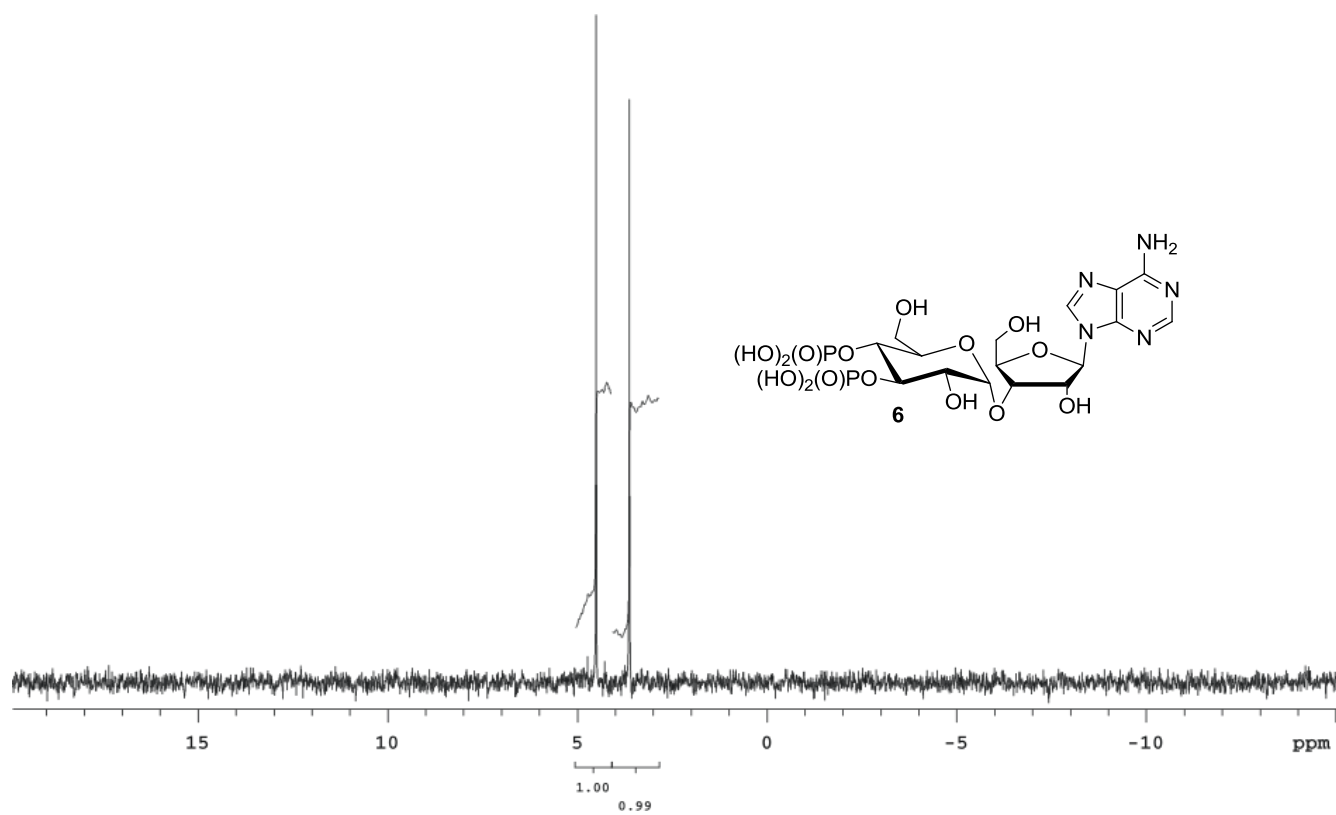

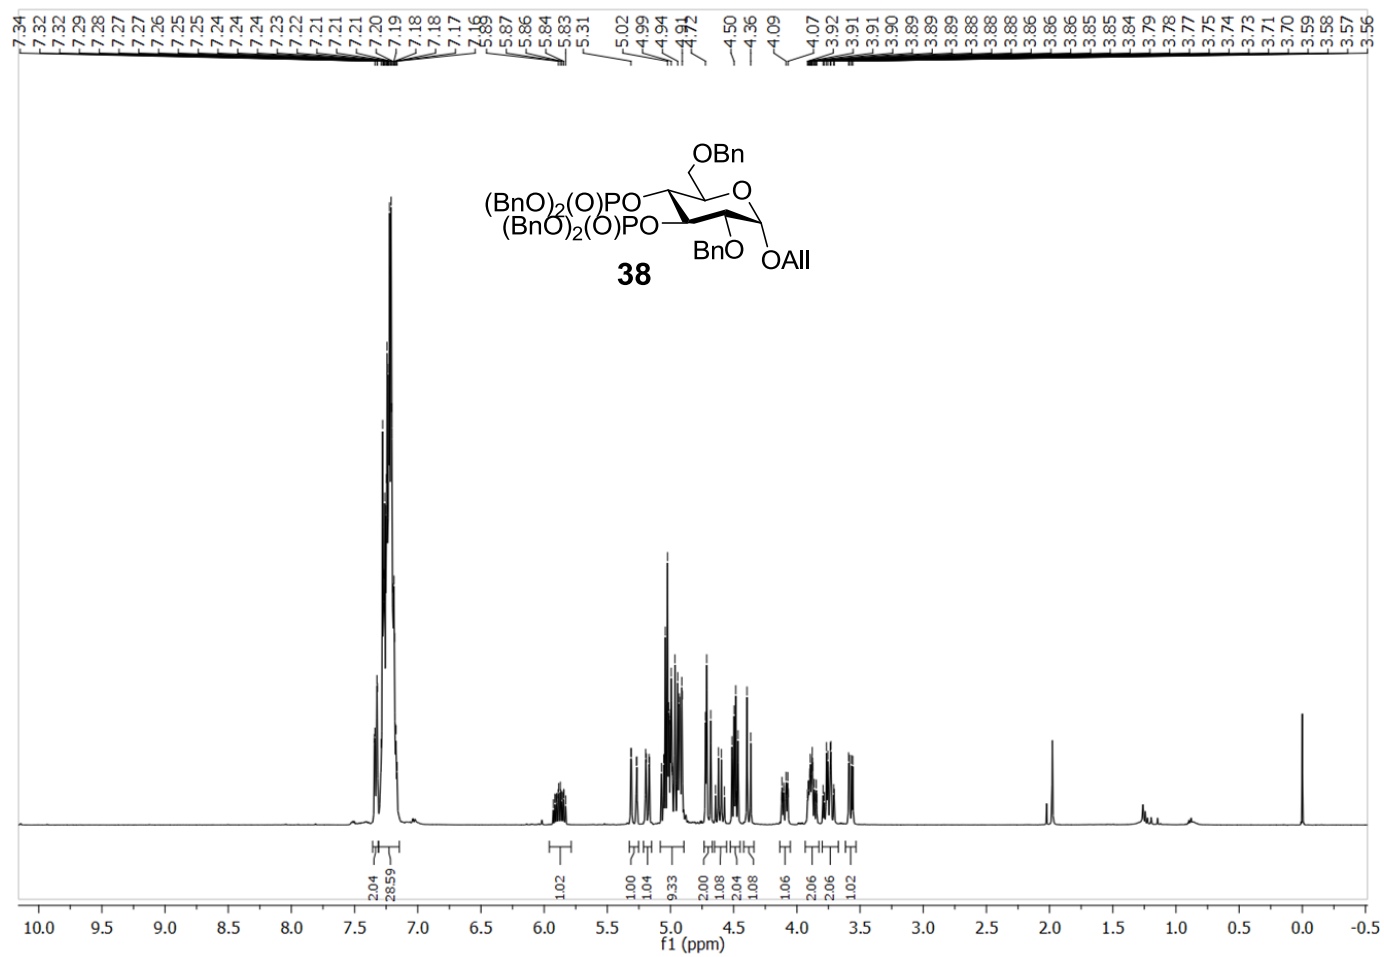

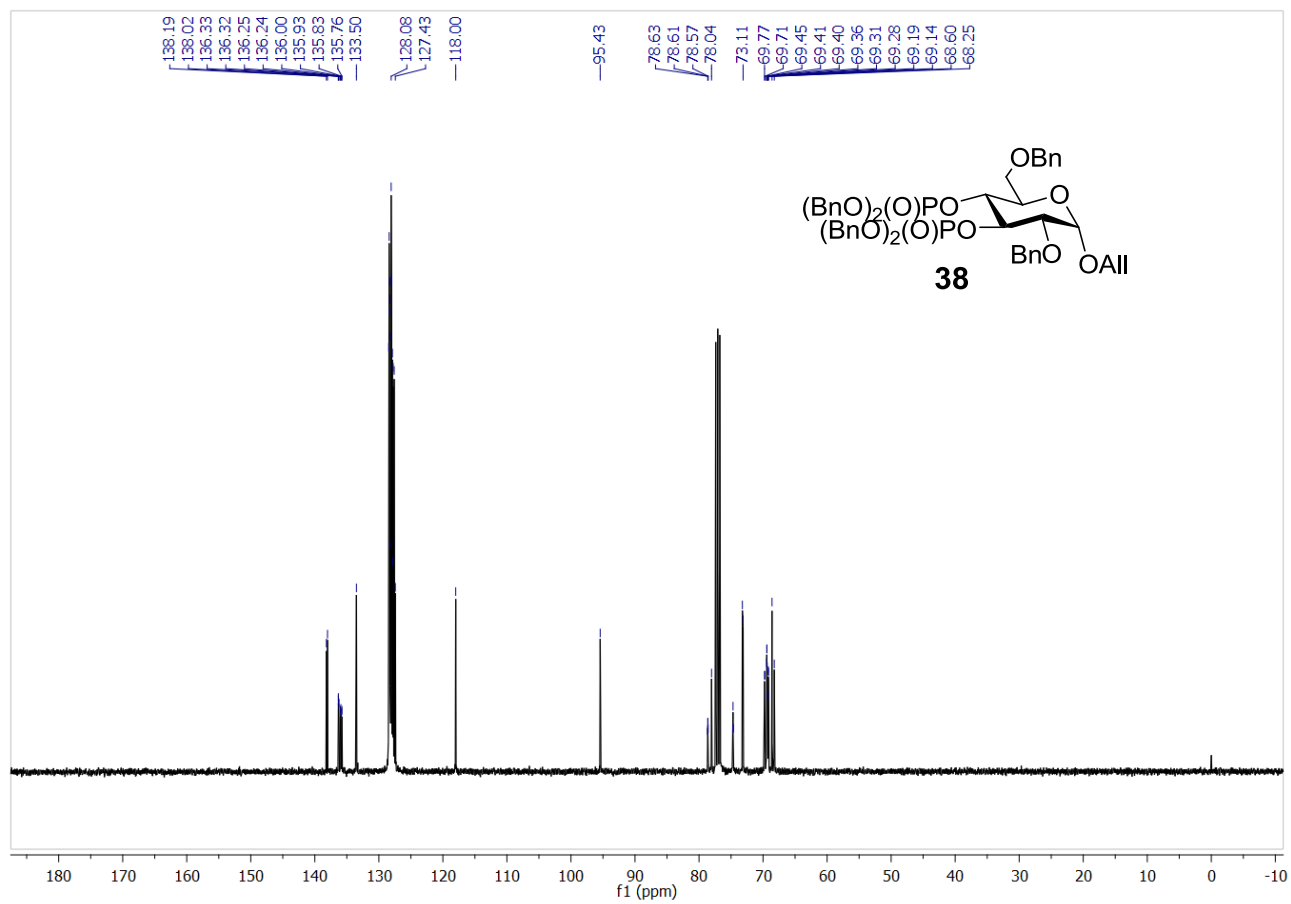

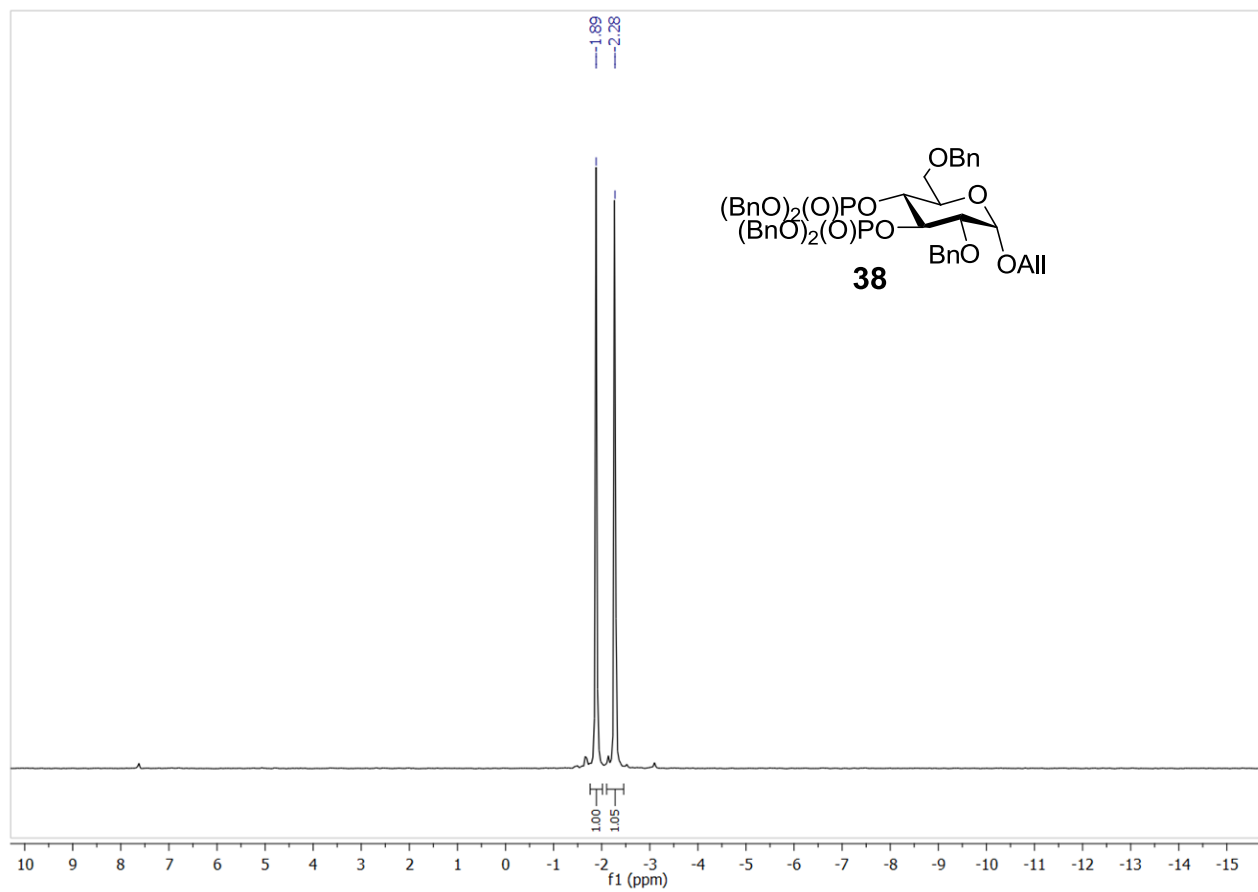

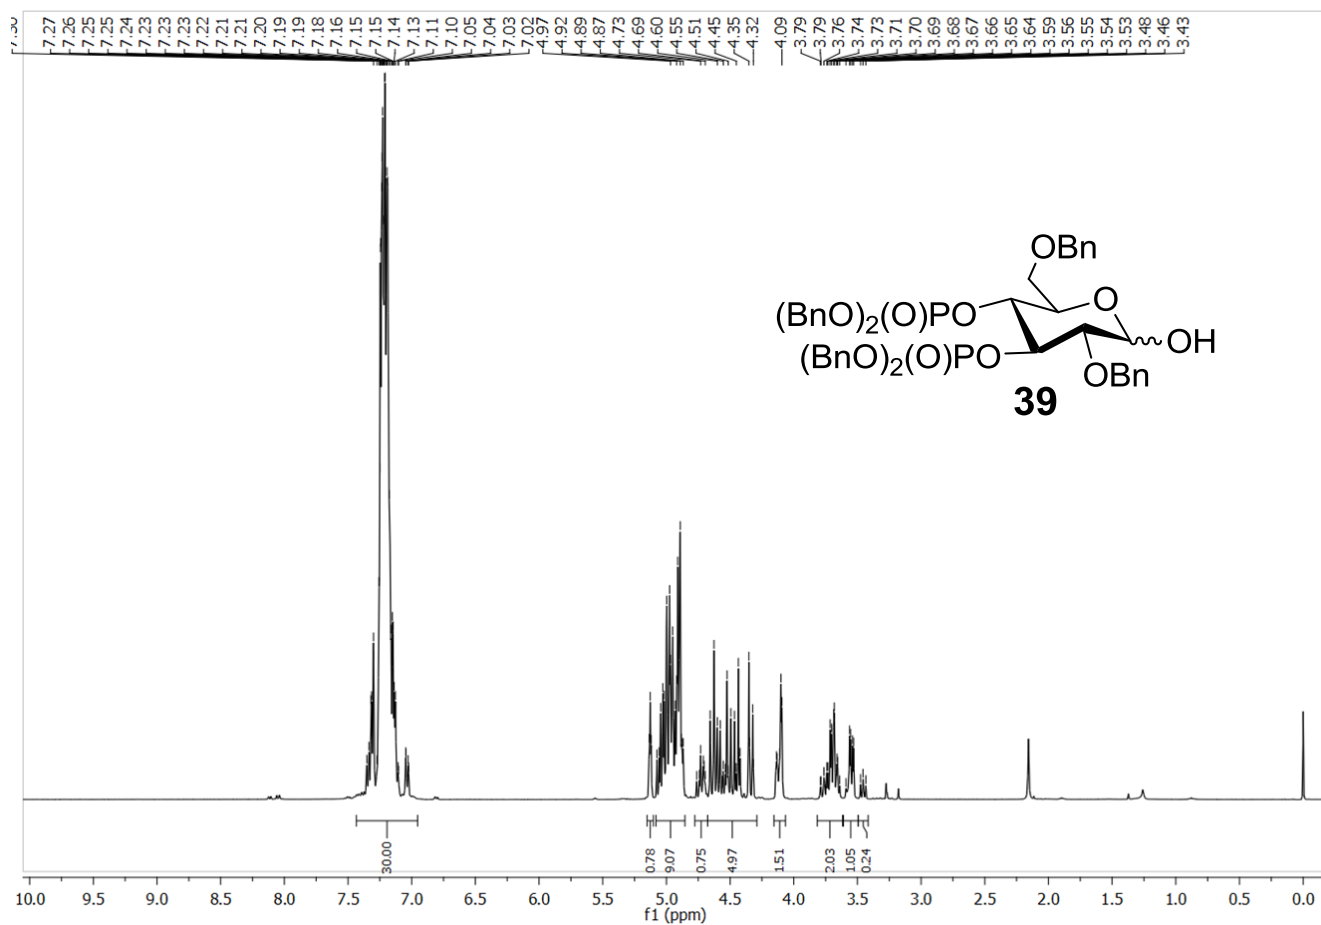



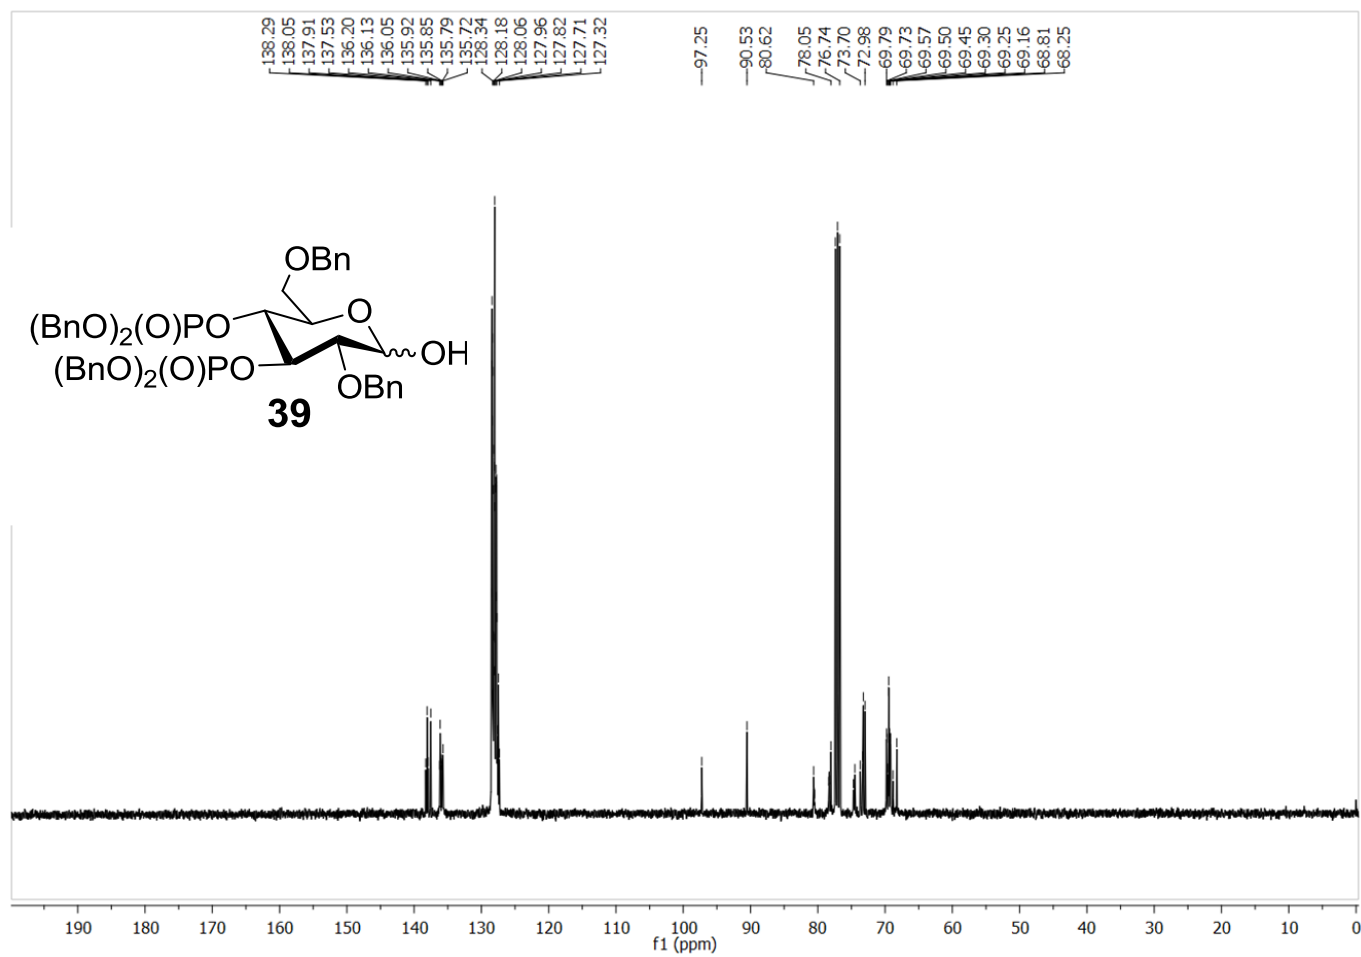

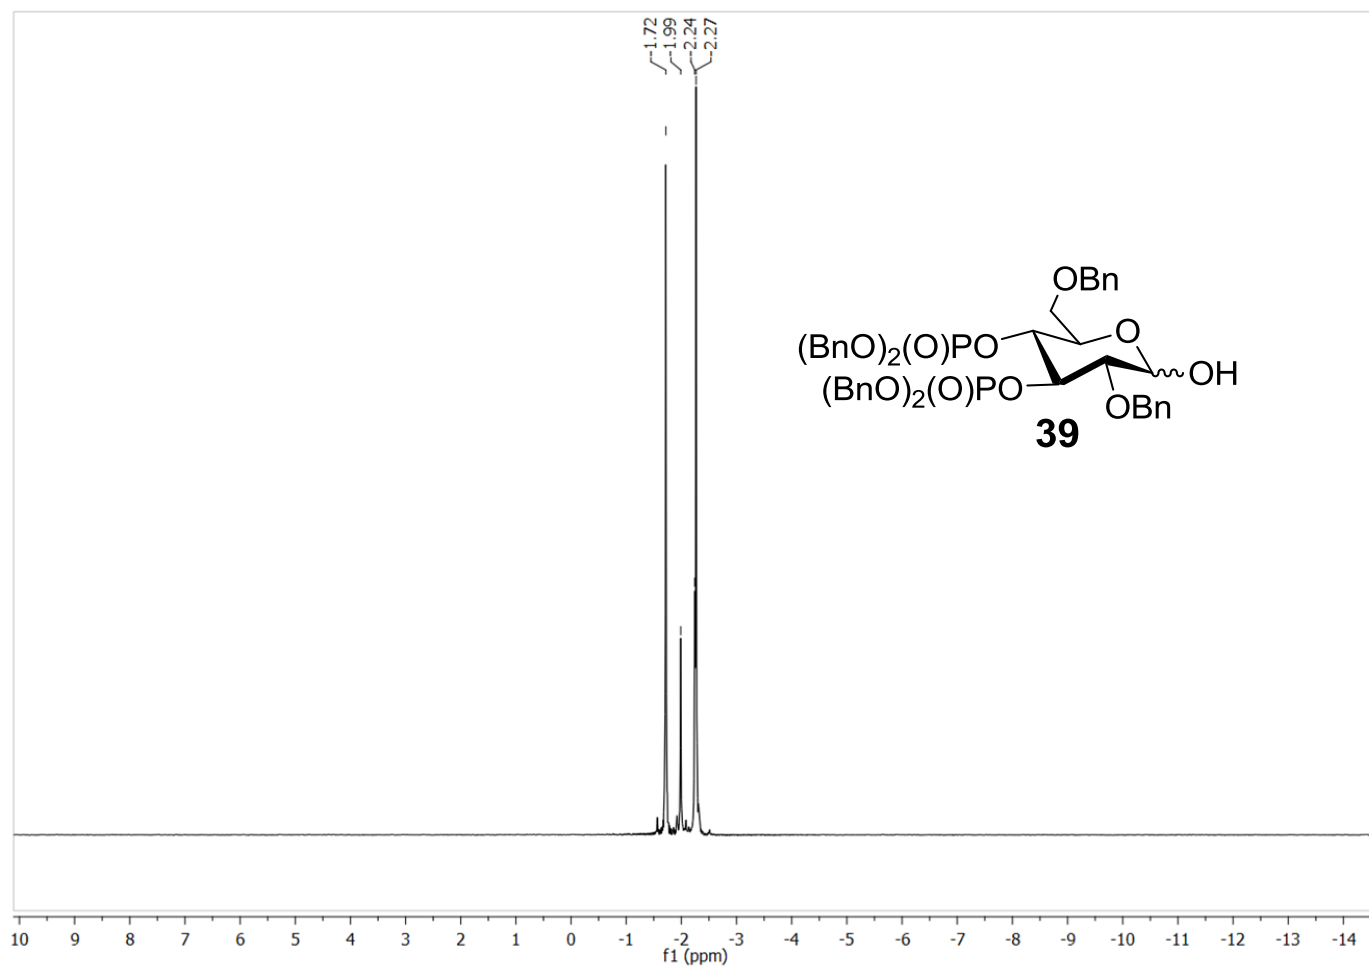

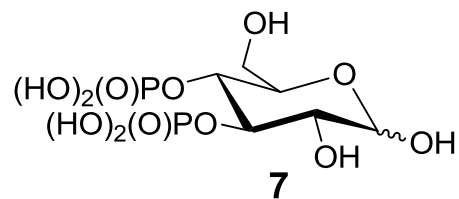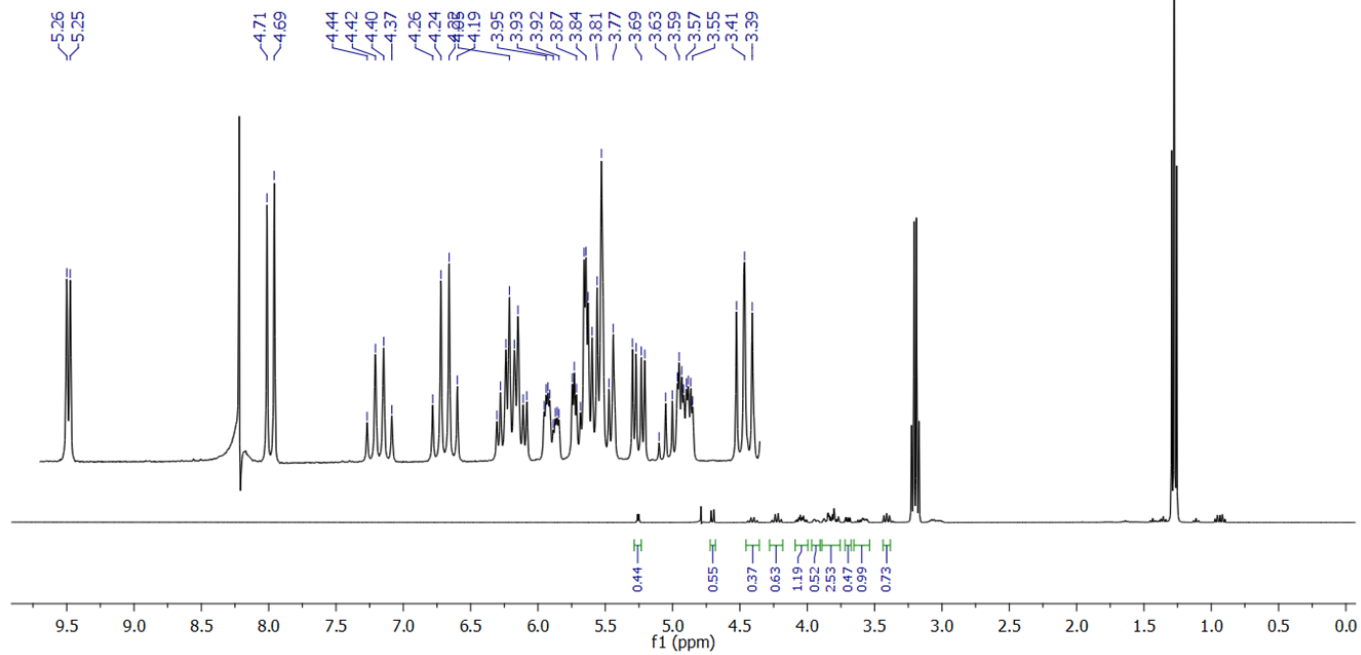

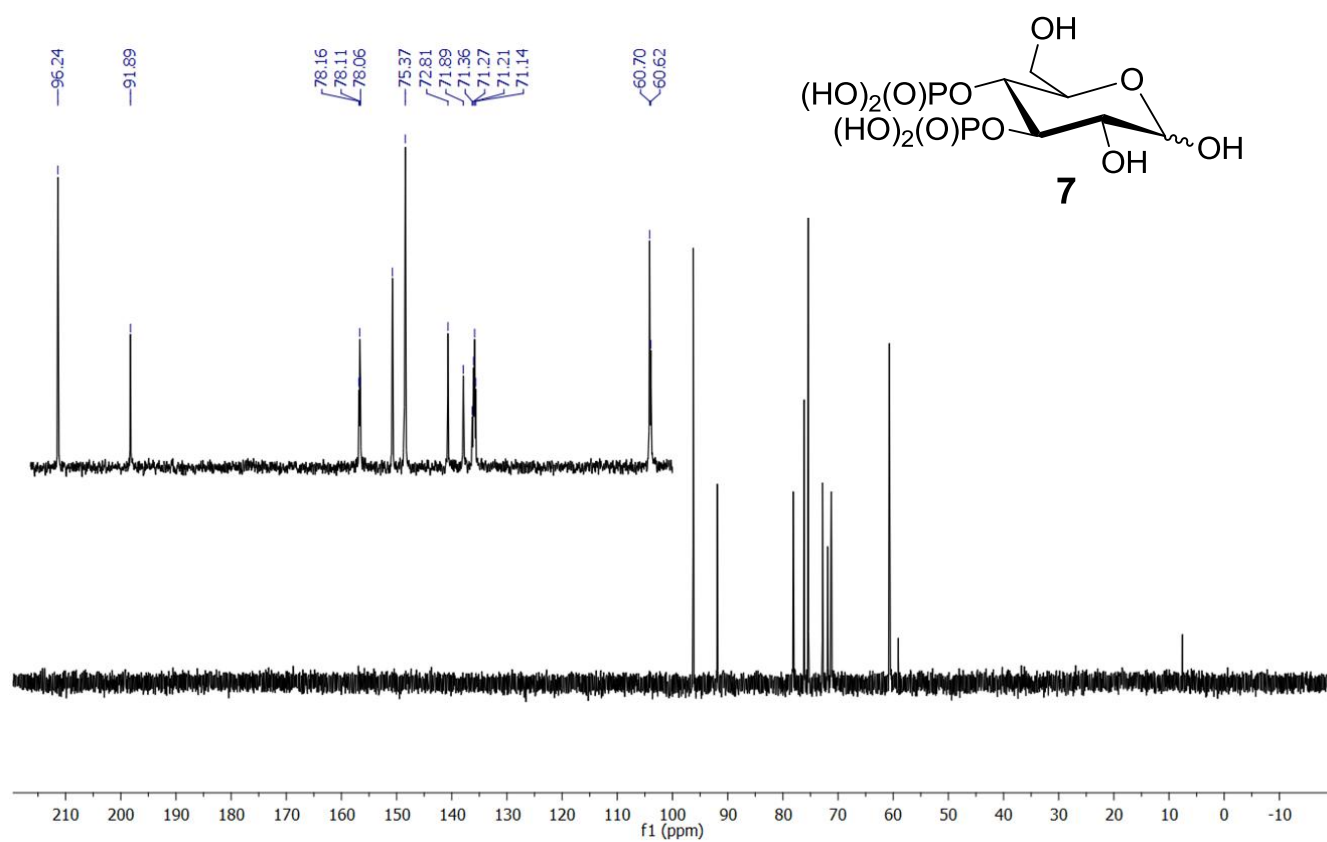

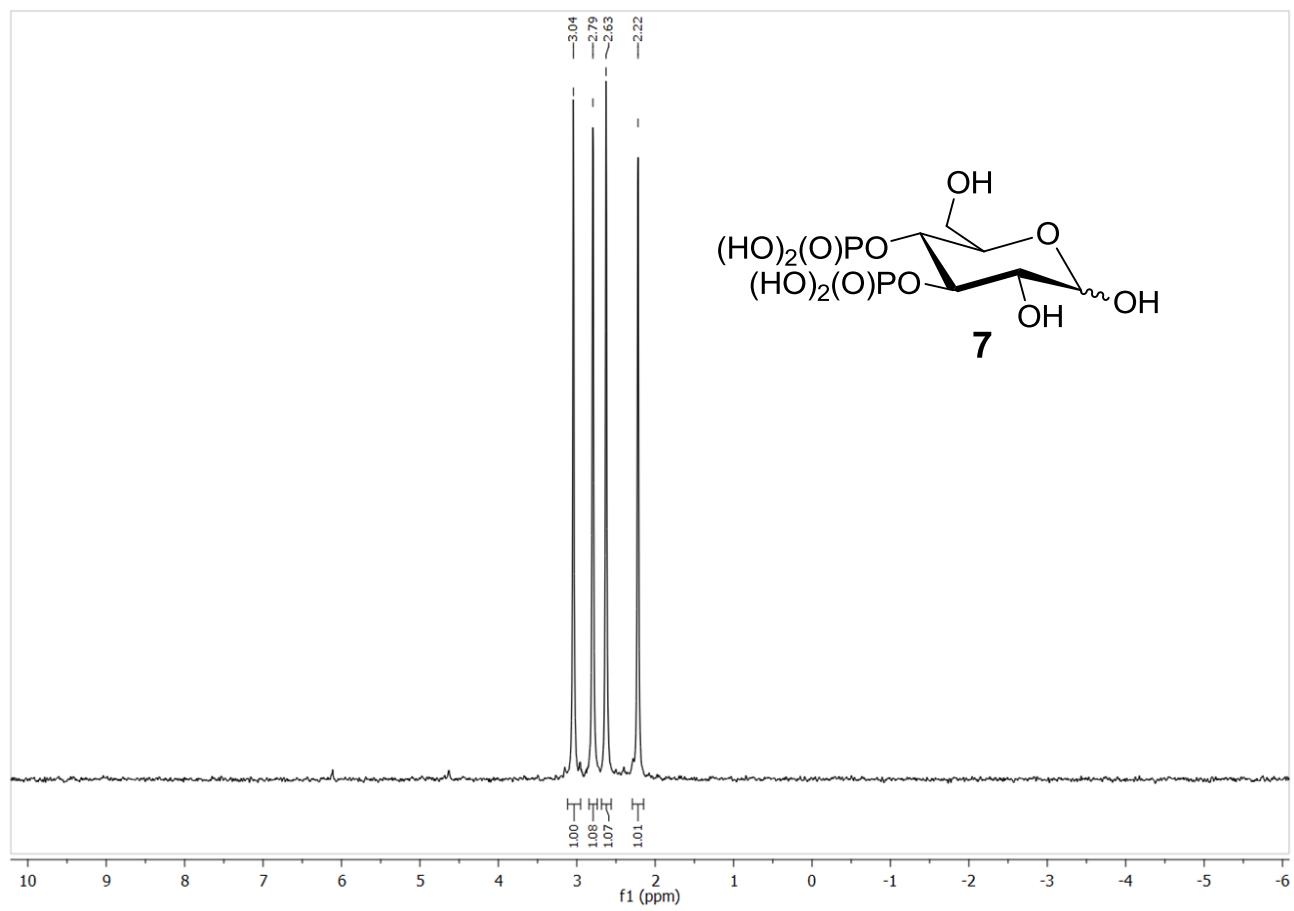

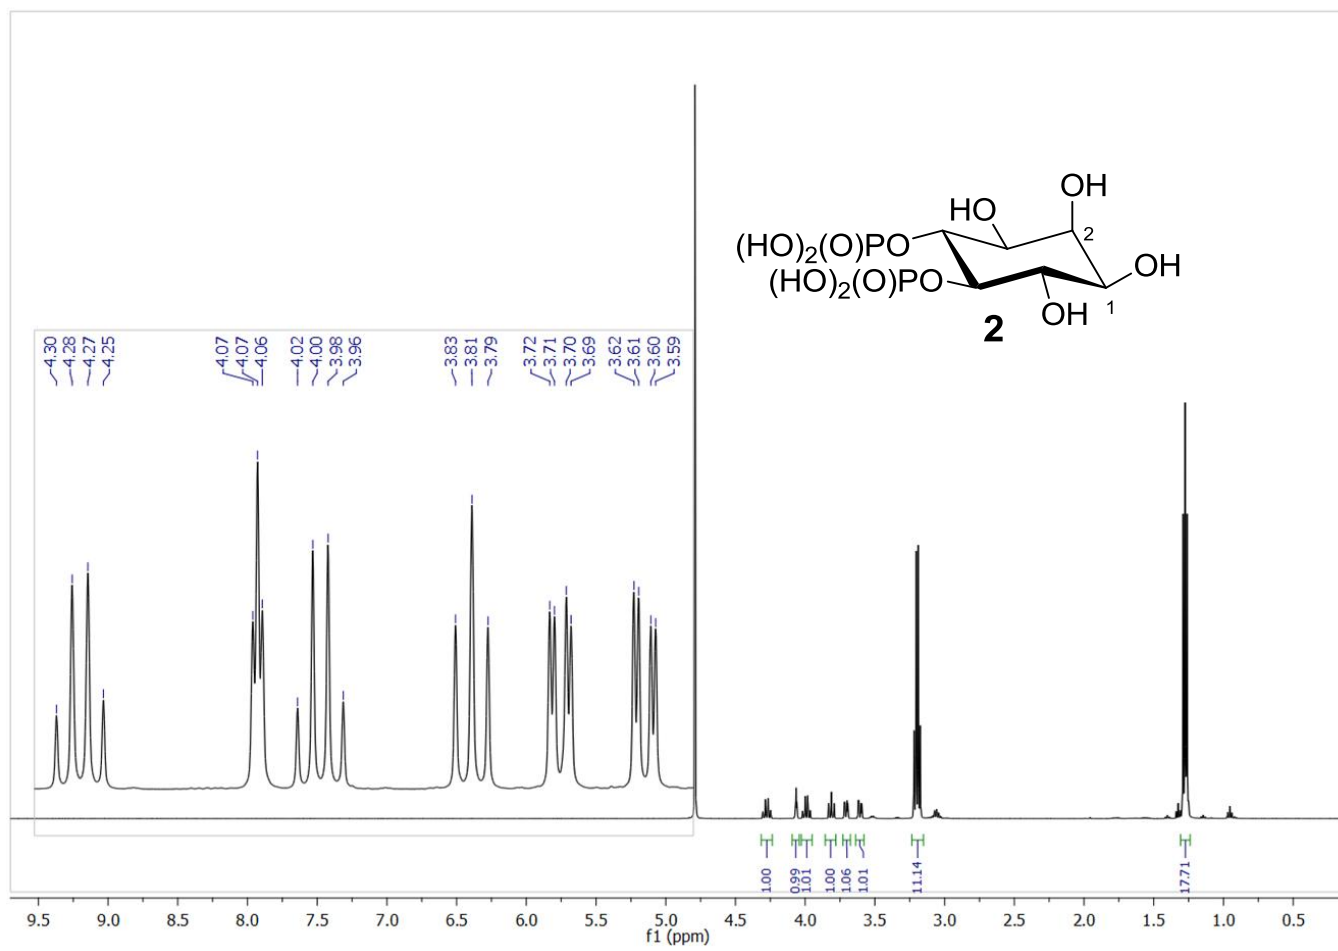

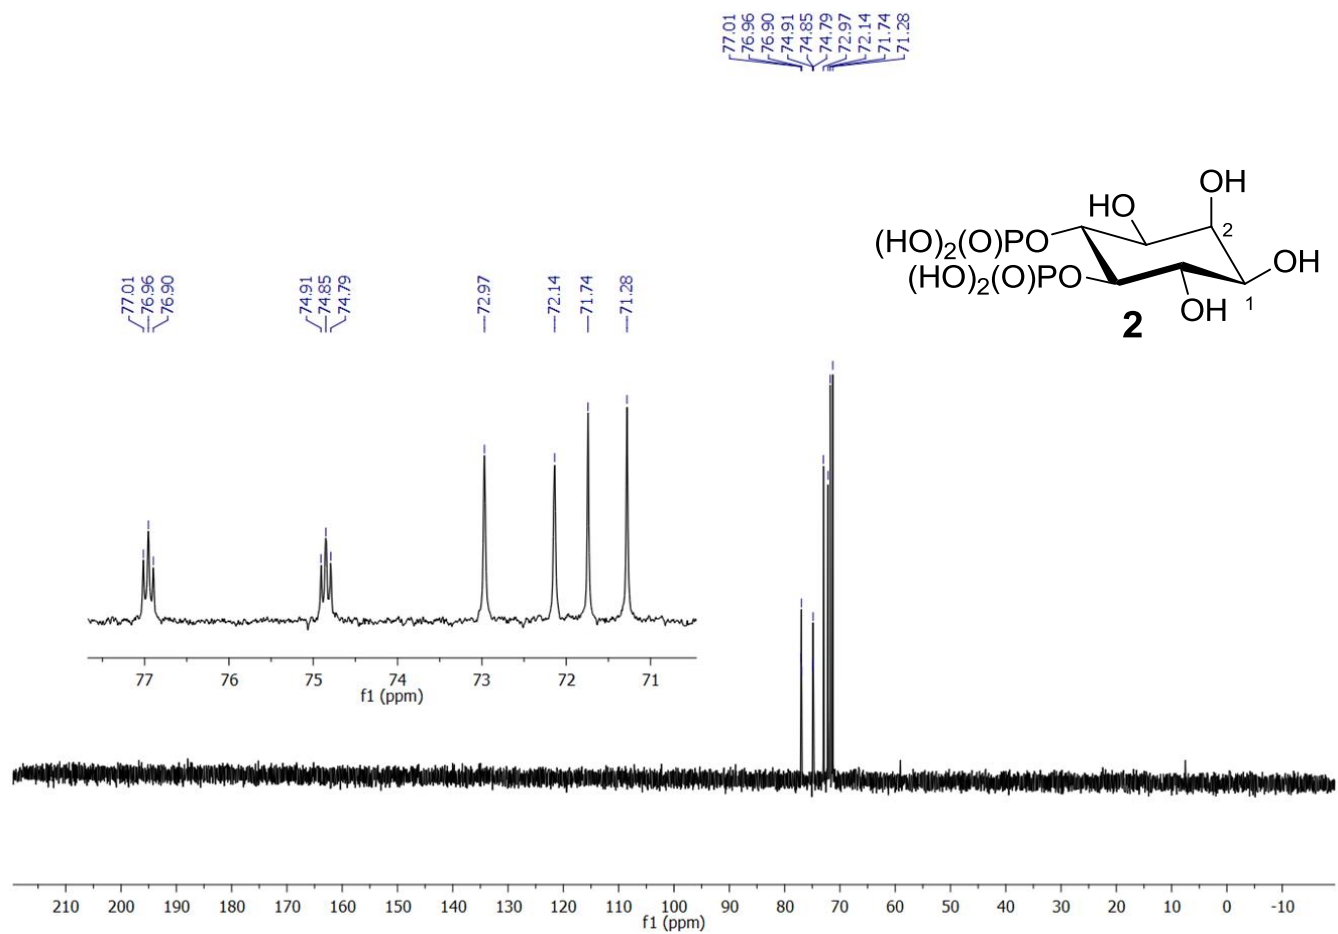

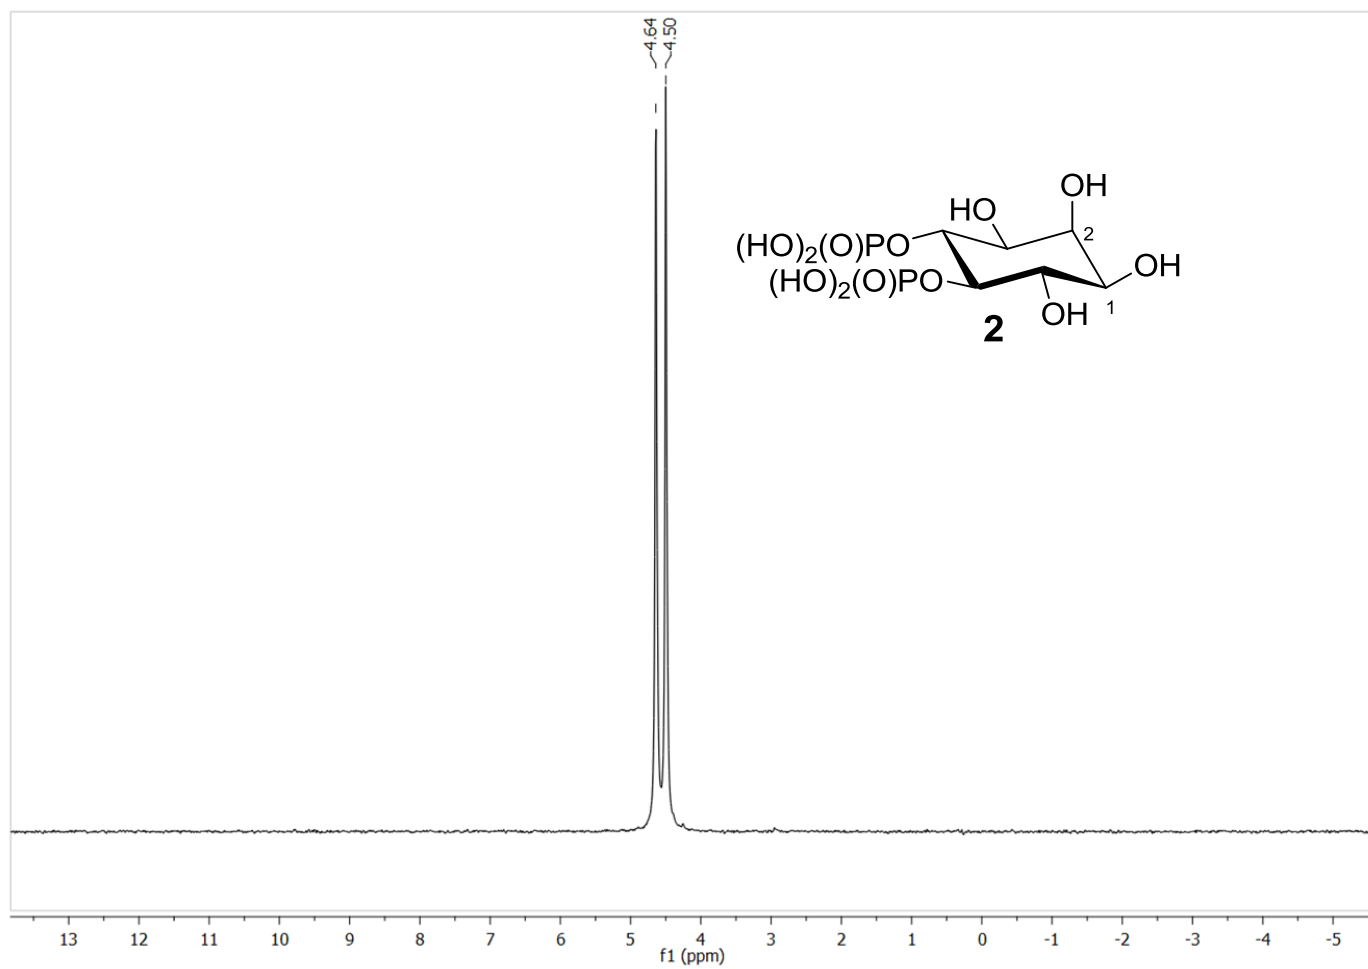

Supplement: jm201571p_si_002.pdf [file jm201571p_si_002.pdf]
